# Supplementary material for: Role of cytoneme structures and extracellular vesicles in Trichomonas vaginalis parasite-parasite communication
Source: eLife. 2023 May 2;12:e86067. doi: 10.7554/eLife.86067 (PMC10270686; doi:10.7554/eLife.86067)
Supplement: Supplementary file 1. — LFQ(label-free quantitation) intensity: Untargeted label-free quantitation of proteins. [file elife-86067-supp1.xlsx]

## Sheet: Hoja1
Locus	Protein names	Predicted GO Biological Process	LFQ intensity CDC1132 sample 1	LFQ intensity CDC1132 sample 2	LFQ intensity CDC1132 sample 3	LFQ intensity G3 sample 1	LFQ intensity G3 sample 2	LFQ intensity G3 sample 3	LFQ intensity B7RC2 sample 1	LFQ intensity B7RC2 sample 2	LFQ intensity B7RC2 sample 3	Surface (de Miguel et al., 2010)	sEVs (Twu et al., 2013)	MVs (Nievas et al., 2018)	Secretome (Štáfková et al., 2018)	sEVs (Govender et al., 2020)	Mix Evs (Salas et al., 2021)	sEVs (Rada et al., 2022)
TVAG_154680	Conserved Hypothetical Protein	Carbohydrate Metabolic Process	302336368560791	312175483703613	317103023529053	272002277374268	263285846710205	272597045898438	279117660522461	27521032333374	279646053314209	X	X	X	X		X
TVAG_485210;TVAG_310030;TVAG_249200;TVAG_200190;TVAG_172680;TVAG_160060;TVAG_149090;TVAG_512800;TVAG_337240;TVAG_090470;TVAG_054030;TVAG_150270;TVAG_534990	Actin, Putative	Uncharacterized	326711158752441	3209619140625	320236663818359	302906589508057	312230854034424	313299922943115	311191062927246	313825225830078	316338710784912			X			X
TVAG_038420	Conserved Hypothetical Protein	Uncharacterized	274648208618164	279384841918945	280508728027344	260954093933105	268089447021484	269615726470947	281683483123779	279250164031982	285258922576904			X	X		X
TVAG_157940	Conserved Hypothetical Protein	Carbohydrate Metabolic Process	306532649993896	310735473632813	317962970733643	269920482635498	263336944580078	271829090118408	285587368011475	284089622497559	284841232299805	X	X	X	X		X
TVAG_394260;TVAG_340940	Conserved Hypothetical Protein	Uncharacterized	260685596466064	26106653213501	268894824981689	250080413818359	283004245758057	276416168212891	266205883026123	264968757629395	259150638580322	X			X		X
TVAG_420390	Phosphoenolpyruvate Carboxykinase, Putative	Gluconeogenesis	286774444580078	279485988616943	283198013305664	274051933288574	276507511138916	284158267974854	276456775665283	279160442352295	276800975799561		X	X	X		X
TVAG_238830	Malic Enzyme, Putative	Pyruvate Metabolic Process	297065029144287	305471057891846	318856201171875	285167560577393	271467609405518	275347499847412	27954158782959	279351139068604	287863750457764	X		X	X		X
TVAG_366380;TVAG_146910	Glyceraldehyde 3-Phosphate Dehydrogenase, Putative	Uncharacterized	301107311248779	292051773071289	299785556793213	311300754547119	306025791168213	311274948120117	287223415374756	286011276245117	289599437713623		X	X			X
TVAG_151220	Heat Shock Protein 70 (Hsp70)-4, Putative	Cellular Response To Unfolded Protein	284081115722656	278626022338867	281714534759521	28782693862915	282961845397949	284717350006104	275512008666992	275040798187256	272479858398438		X	X	X
TVAG_276410;TVAG_016880	Translation Elongation Factor, Putative	Translation	275889949798584	268897151947021	273245735168457	277739810943604	274405517578125	273890323638916	264490814208984	263569602966309	261611175537109	X	X	X	X	X	X
TVAG_420260	Atp Synthase Beta Subunit, Putative	Atp Biosynthetic Process	282379951477051	268455352783203	278293533325195	274849281311035	272207584381104	277643947601318	270596141815186	271314373016357	274018611907959	X	X	X	X		X	X
TVAG_190450;TVAG_190470	Kakapo, Putative	Uncharacterized	285417804718018	284081935882568	289075889587402	279890727996826	284647808074951	287879638671875	272473526000977	273451957702637	274050312042236	X	X	X	X	X	X
TVAG_348330	Glycogen Phosphorylase, Putative	Carbohydrate Metabolic Process	272650814056396	278971214294434	279935073852539	251567668914795	270271759033203	265687580108643	265268630981445	262516021728516	268636054992676	X		X	X	X	X
TVAG_463940;TVAG_067400	Translation Factor, Putative	Uncharacterized	290847663879395	283691959381104	285152530670166	285973663330078	284239025115967	28425464630127	286140022277832	286981964111328	28203125		X	X			X
TVAG_371800	Conserved Hypothetical Protein	Proteolysis	273489990234375	274599056243896	281858882904053	290026817321777	27583553314209	274120769500732	267783126831055	269322452545166	270902290344238	X	X	X	X		X	X
TVAG_239310	Bollus Pemphigoid Antigen, Putative	Uncharacterized	25681209564209	258873462677002	260609760284424	252889099121094	260309066772461	257673664093018	259739284515381	258484992980957	262530822753906	X	X	X	X		X
TVAG_452020	Conserved Hypothetical Protein	Uncharacterized	267420120239258	279748687744141	283553562164307	263091087341309	257478618621826	260725116729736	268565006256104	269074745178223	275998153686523				X		X
TVAG_043500	Enolase, Putative	Glycolytic Process	29277063369751	295307559967041	296675987243652	293869781494141	305144634246826	29121244430542	289747333526611	29076379776001	286650581359863	X	X	X	X		X
TVAG_324980	Atp Synthase, Putative	Ion Transport	28394193649292	271768360137939	282316913604736	283782386779785	27915132522583	285528869628906	274766101837158	274917488098145	27955545425415		X	X	X		X	X
TVAG_360700	Fructose-Bisphosphate Aldolase, Putative	Carbohydrate Metabolic Process	295543899536133	291222324371338	292937088012695	306340885162354	309669857025146	306426334381104	287179679870605	287340526580811	287257251739502		X	X	X		X
TVAG_166580	Conserved Hypothetical Protein	Cell Morphogenesis	263285503387451	251445274353027	262043933868408	253816585540771	256366348266602	256724967956543	249219779968262	252516918182373	255315418243408			X	X		X	X
TVAG_059980	Conserved Hypothetical Protein	Uncharacterized	268168983459473	272977161407471	274334850311279	274513626098633	275134468078613	279692802429199	266548538208008	259602699279785	260912380218506	X			X		X
TVAG_061930;TVAG_389750	Glucose-6-Phosphate Isomerase, Putative	Gluconeogenesis	273964004516602	272562885284424	27730785369873	291464939117432	28572826385498	291044960021973	272852439880371	270826358795166	273051300048828		X	X	X		X
TVAG_321740	Conserved Hypothetical Protein	Uncharacterized	29763557434082	292472171783447	299992713928223	299815540313721	299756889343262	30007984161377	240582942962646	227050380706787	241382904052734	X		X	X		X	X
TVAG_153560;TVAG_155020;TVAG_034720	Heat Shock Protein, Putative	Protein Folding	282025184631348	27363525390625	272628440856934	266394805908203	268705596923828	26974760055542	277364730834961	275305881500244	268209209442139	X	X	X	X		X
TVAG_388650	Serine Palmitoyltransferase I, Putative	Biosynthetic Process	281069431304932	289996757507324	28582010269165	20723840713501	267794399261475	260050888061523	260998287200928	262052707672119	270865898132324				X		X	X
TVAG_210320	Adenosylhomocysteinase, Putative	One-Carbon Metabolic Process	274339637756348	274293403625488	281580295562744	290893440246582	27433723449707	292342300415039	267099094390869	268687953948975	267349243164063			X	X		X
TVAG_318870	Spermatogenesis Associated Factor, Putative	Ubiquitin-Dependent Erad Pathway	260486392974854	257637748718262	25020092010498	252716674804688	249849834442139	249721984863281	258085765838623	254357128143311	254012584686279	X		X	X		X
TVAG_402580	Ribonucleoside-Diphosphate Reductase Alpha Chain, Puta	Dna Replication	281976985931396	269656524658203	269452533721924	253927040100098	25505973815918	258832492828369	279507141113281	281550388336182	277607841491699		X	X	X		X
TVAG_204360	Malate Dehydrogenase, Putative	Tricarboxylic Acid Cycle	287322750091553	284253845214844	282726211547852	294476623535156	289608554840088	290748500823975	274138526916504	272075996398926	273991737365723	X	X	X	X		X
TVAG_092490	Heat Shock Protein 70Kd, Putative	Ubiquitin-Dependent Erad Pathway	291411190032959	301120986938477	296113128662109	227065982818604	244215602874756	254159965515137	263472766876221	265746593475342	271965732574463	X		X	X		X	X
TVAG_351790	Conserved Hypothetical Protein	Uncharacterized	274246234893799	279569301605225	27583122253418	28869441986084	282253150939941	270714263916016	229562606811523	225576572418213	258590145111084	X		X	X		X	X
TVAG_126970	Rab Gdp-Dissociation Inhibitor, Putative	Small Gtpase Mediated Signal Transduction	282236595153809	274059238433838	281675834655762	289185771942139	284253845214844	290421562194824	282839202880859	280691223144531	28112024307251		X	X	X		X	X
TVAG_461020;TVAG_064700;TVAG_478620;TVAG_072410;TVAG_033020	Abc Transporter, Putative	Lipid Transport	270885105133057	269427967071533	270599231719971	27084867477417	264322280883789	265887794494629	222211074829102	216081962585449	251869564056396	X		X			X	X
TVAG_456920;TVAG_062880;TVAG_008680;TVAG_034440;TVAG_525430;TVAG_148400;TVAG_338530	Tubulin Alpha Chain, Putative	Uncharacterized	278166542053223	273759212493896	267910404205322	245818157196045	258364868164063	258433322906494	283221683502197	284016990661621	28592170715332		X	X			X
TVAG_067980;TVAG_054130	60S Ribosomal Protein L7, Putative	Uncharacterized	273184661865234	287064552307129	277488079071045	277226009368896	273510227203369	267868099212646	27915075302124	27589994430542	280790271759033			X	X		X
TVAG_087140	Arp2/3, Putative	Actin Filament Polymerization	258068332672119	260148029327393	270324401855469	249248352050781	254007701873779	261583080291748	209783382415771	0	21363245010376		X	X	X		X
TVAG_156680	Vab10 Spectraplakin, Putative	Uncharacterized	261731224060059	257382526397705	259422149658203	259785175323486	25314754486084	25413480758667	252627372741699	258000087738037	253616199493408		X	X	X		X
TVAG_228780	Alcohol Dehydrogenase, Putative	Uncharacterized	272311420440674	275065021514893	27100191116333	28949686050415	287279319763184	283622303009033	278317718505859	272620372772217	276039237976074	X		X	X		X
TVAG_456340	Conserved Hypothetical Protein	Small Gtpase Mediated Signal Transduction	269489345550537	248794212341309	25514575958252	221116218566895	236208686828613	233003368377686	0	0	207280826568604			X	X		X
TVAG_490240;TVAG_454000;TVAG_064640;TVAG_113720	Ribosomal Protein L5, Putative	Uncharacterized	280180225372314	286599998474121	276194686889648	267454776763916	272110404968262	268757247924805	283442230224609	279743766784668	285672512054443			X			X
TVAG_218130	Conserved Hypothetical Protein	Uncharacterized	26135181427002	261962356567383	265521984100342	232130737304688	255892372131348	245387210845947	2429052734375	228753776550293	243290977478027	X			X		X	X
TVAG_276310	Starch Branching Enzyme Ii, Putative	Carbohydrate Metabolic Process	267009429931641	266496562957764	260165042877197	234005432128906	250689487457275	248469944000244	216471538543701	0	243487453460693			X	X		X
TVAG_351310;TVAG_116370	Plastin, Putative	Actin Filament Bundle Assembly	270380001068115	273393459320068	281554260253906	282759532928467	286527366638184	293800773620605	262837448120117	259041004180908	266816387176514	X	X	X	X		X
TVAG_462940;TVAG_469400	14-3-3 Protein Sigma, Gamma, Zeta, Beta/Alpha, Putative	Signal Transduction	282388610839844	279094772338867	27838098526001	280194549560547	283279590606689	282622165679932	275739097595215	279368000030518	278926124572754		X	X	X		X
TVAG_573910	Conserved Hypothetical Protein	Uncharacterized	267423973083496	26988260269165	27670202255249	286740798950195	295413570404053	296306381225586	281346225738525	277470149993896	275245494842529	X		X	X	X	X
TVAG_360870;TVAG_359090;TVAG_312330;TVAG_206890;TVAG_196270;TVAG_523980;TVAG_519620;TVAG_345420;TVAG_448410;TVAG_428730	Tubulin Epsilon Chain, Putative	Uncharacterized	276764698028564	275208835601807	268671455383301	247297744750977	25789026260376	260551929473877	280306015014648	279611873626709	281585578918457			X			X
TVAG_479540	Phosphoenolpyruvate Carboxykinase, Putative	Gluconeogenesis	285666694641113	276651268005371	281651401519775	27329029083252	275596122741699	27935396194458	274002342224121	275681934356689	275359363555908		X	X	X		X
TVAG_222040	Conserved Hypothetical Protein	Carbohydrate Metabolic Process	295537662506104	29955738067627	309211044311523	256111621856689	237426280975342	258614311218262	262821197509766	249776229858398	253941440582275			X	X		X
TVAG_354040;TVAG_354020	Centractin, Putative	Uncharacterized	269911842346191	261777858734131	263186550140381	255230693817139	253512763977051	256197490692139	258167285919189	261410999298096	260707302093506		X	X			X
TVAG_430830;TVAG_077440;TVAG_335880	Phosphofructokinase, Putative	Fructose 6-Phosphate Metabolic Process	274283828735352	276975002288818	280492630004883	295263233184814	288128967285156	299336795806885	277053680419922	278089447021484	277177066802979		X	X	X		X
TVAG_466640	Conserved Hypothetical Protein	Uncharacterized	251648807525635	232293758392334	242785263061523	240296001434326	233465156555176	239351711273193	232426071166992	218089981079102	220726737976074			X	X		X
TVAG_073860;TVAG_161270	Phosphoenolpyruvate-Protein Phosphotransferase, Putative	Pyruvate Metabolic Process	258694076538086	250211944580078	254597969055176	264515190124512	26737377166748	265912075042725	248535766601563	243396015167236	247757034301758	X	X	X	X		X
TVAG_178890;TVAG_177930	Chaperonin, Putative	Protein Folding	258105392456055	256186294555664	243962364196777	244598274230957	239873714447021	247512874603271	238065624237061	223380508422852	24516170501709		X	X	X		X
TVAG_213210	Conserved Hypothetical Protein	Uncharacterized	277698268890381	282713298797607	282537670135498	272914066314697	283161792755127	277194061279297	249917449951172	0	256395359039307	X		X	X		X	X
TVAG_453790	Conserved Hypothetical Protein	Ion Transport	279358444213867	285394535064697	281148567199707	27433723449707	293156623840332	275821895599365	288114891052246	287629699707031	286607475280762	X	X	X	X		X	X
TVAG_464010;TVAG_204940	Calreticulin, Putative	Protein Folding	271483135223389	278277797698975	282624855041504	214285926818848	215510749816895	229463157653809	0	211313819885254	244955806732178	X			X		X	X
TVAG_064150;TVAG_204680;TVAG_132550	Adp-Ribosylation Factor, Arf, Putative	Intracellular Protein Transport	285351581573486	277596416473389	287298126220703	281752662658691	281352596282959	28693286895752	277097110748291	271713104248047	277958164215088			X
TVAG_205910	Phosphoglucomutase, Putative	Carbohydrate Metabolic Process	274673099517822	274241428375244	276432704925537	292552089691162	28513484954834	292051086425781	276877918243408	277360229492188	278335819244385		X	X	X		X
TVAG_329880	Conserved Hypothetical Protein	Protein Ubiquitination	245561962127686	216142311096191	228979434967041	244768581390381	210711688995361	220008926391602	210696620941162	208615112304688	21906831741333			X	X			X
TVAG_344700	60S Acidic Ribosomal Protein P0, Putative	Ribosomal Large Subunit Assembly	269451427459717	279149608612061	279463138580322	268131103515625	265722618103027	266151237487793	275369739532471	269067859649658	282929420471191			X	X
TVAG_037610	Vacuolar Atp Synthase Subunit C, Putative	Ion Transport	268730278015137	258139190673828	270960731506348	274511260986328	271111793518066	273607654571533	258733081817627	256028614044189	26231746673584			X	X		X	X
TVAG_189150	Conserved Hypothetical Protein	Uncharacterized	243866004943848	252772483825684	238660850524902	0	214844875335693	0	256100921630859	257000961303711	246009922027588	X			X
TVAG_262750	Vacuolar Atp Synthase Subunit H, Putative	Ion Transport	263820705413818	25234619140625	263643779754639	269391002655029	261707000732422	266063957214355	252995681762695	25235969543457	252690296173096			X	X		X	X
TVAG_369310	Conserved Hypothetical Protein	Cell Migration	245941162109375	241582317352295	251164436340332	267677459716797	257002830505371	255799198150635	256563014984131	25253568649292	257436046600342			X			X	X
TVAG_583060;TVAG_379260;TVAG_239500;TVAG_131210;TVAG_098450;TVAG_335480;TVAG_098430	30S/40S Ribosomal Protein S4, Putative	Uncharacterized	2621462059021	262655296325684	254908466339111	25296070098877	250551528930664	248915233612061	2652956199646	266427879333496	266903247833252	X		X	X		X
TVAG_189110;TVAG_128790	60S Ribosomal Protein L4, Putative	Uncharacterized	263456878662109	266486968994141	262252521514893	28281623840332	267001495361328	270981826782227	268764266967773	276039237976074	275628910064697		X	X
TVAG_171100	Malate Dehydrogenase, Putative	Tricarboxylic Acid Cycle	274735946655273	266217060089111	272741775512695	288310470581055	288512363433838	291034717559814	279786930084229	279936695098877	282281169891357						X
TVAG_224980	Clan Mh, Family M20, Peptidase T-Like Metallopeptidase	Proteolysis	265015907287598	259192523956299	264306011199951	267779369354248	271153526306152	27830924987793	27646089553833	278040904998779	280071544647217		X	X	X		X
TVAG_386080	Clan Mg, Familly M24, Aminopeptidase P-Like Metallop	Uncharacterized	278277797698975	278192768096924	281773109436035	285446949005127	295438098907471	294655208587646	280752067565918	279621257781982	287282562255859			X	X		X
TVAG_124870	Wd-Repeat Protein, Putative	Actin Filament Organization	283373489379883	277867488861084	274457702636719	28346212387085	285940589904785	291378021240234	27990966796875	279727897644043	283373489379883		X	X	X		X
TVAG_261950	Conserved Hypothetical Protein	Uncharacterized	282055511474609	285235767364502	288389701843262	28943998336792	290657901763916	286846523284912	274880752563477	275901374816895	281023445129395		X	X	X		X	X
TVAG_274750	Gtp-Binding Protein Alpha Subunit, Gna, Putative	Signal Transduction	275638370513916	261965560913086	27293249130249	273875541687012	267628116607666	272085304260254	250408039093018	259948768615723	260355491638184		X	X	X		X	X
TVAG_359120	Ribosomal S Subunit, Putative	Translation	262249946594238	263874053955078	252486553192139	25317102432251	250396327972412	253217887878418	271395587921143	272876243591309	27529993057251			X	X
TVAG_474980	Dihydrolipoamide Dehydrogenase, Putative	Removal Of Superoxide Radicals	26921049118042	264948024749756	270403022766113	278167152404785	279380340576172	283627738952637	260334072113037	261206817626953	264476318359375		X	X	X		X
TVAG_532880;TVAG_562540	Clathrin Heavy Chain, Putative	Intracellular Protein Transport	252077674865723	245605754852295	249928703308105	23711353302002	240199642181396	236847457885742	246475715637207	227944755554199	223978309631348			X	X		X
TVAG_066690	Chaperonin Containing T-Complex Protei	Protein Folding	258587532043457	2571630859375	248346557617188	242154159545898	239647274017334	245583000183105	251846122741699	252744083404541	251495742797852			X	X		X
TVAG_258230	Conserved Hypothetical Protein	Uncharacterized	263929824829102	261288051605225	270586853027344	272598838806152	265205974578857	267798156738281	238411502838135	227281036376953	246902980804443	X	X	X	X		X	X
TVAG_398480	Chaperonin-60Kd, Ch60, Putative	Protein Folding	266100635528564	259076805114746	254827461242676	243709926605225	244109935760498	247228088378906	244842529296875	237223415374756	245599346160889		X	X	X
TVAG_444970	Conserved Hypothetical Protein	Carbohydrate Metabolic Process	260719795227051	254698581695557	260116939544678	0	210788097381592	0	0	0	211845893859863				X		X
TVAG_461030;TVAG_245200;TVAG_440500;TVAG_064710	Abca6, Putative	Lipid Transport	268604125976563	268942337036133	268905277252197	265465278625488	26323558807373	263506526947021	0	0	240405941009521	X		X			X	X
TVAG_485580	Synaptotagmin 1,2, Putative	Uncharacterized	248670291900635	250508422851563	258401660919189	255417079925537	260312423706055	258182888031006	0	0	218638935089111	X			X		X	X
TVAG_024690	Isoleucyl Trna Synthetase, Putative	Translation	248530521392822	232073802947998	244214324951172	24072265625	250779800415039	242018737792969	220270538330078	210293140411377	216511459350586			X	X
TVAG_038550	Conserved Hypothetical Protein	Uncharacterized	242768936157227	245709171295166	256884059906006	266624794006348	261901435852051	258651885986328	236705532073975	232534828186035	247193145751953	X		X				X
TVAG_297470;TVAG_255140;TVAG_198960;TVAG_054500	60S Ribosomal Protein L9, Putative	Uncharacterized	266864566802979	272368087768555	273401107788086	261012725830078	261794204711914	260248336791992	27105094909668	268248100280762	274259834289551			X			X
TVAG_056190	Clan Mh, Family M20, Peptidase T-Like Metallopeptidase	Proteolysis	263371181488037	26302848815918	269542694091797	280475997924805	284190864562988	2867431640625	266069602966309	25874153137207	26344518661499		X	X	X		X
TVAG_096350	Triosephosphate Isomerase, Putative	Gluconeogenesis	282074146270752	277680606842041	282632026672363	3058154296875	299280414581299	30161828994751	245724201202393	254074649810791	254984741210938		X	X	X			X
TVAG_462690;TVAG_420140;TVAG_314710;TVAG_263040;TVAG_178710;TVAG_106800	30S Ribosomal Protein S3, Putative	Uncharacterized	274606876373291	28311336517334	275154037475586	258790016174316	268026733398438	257525901794434	0	0	283887844085693			X			X
TVAG_114310	Peroxiredoxins, Prx-1, Prx-2, Prx-3, Putative	Response To Oxidative Stress	29239839553833	28378776550293	289448642730713	282781715393066	298879299163818	296931858062744	27681303024292	275313320159912	267806930541992	X		X	X		X	X
TVAG_163450;TVAG_163440;TVAG_163210;TVAG_163180	30S Ribosomal Protein S7P, Putative	Uncharacterized	257158622741699	268427810668945	248893432617188	243481388092041	241731033325195	24015718460083	267037181854248	265085144042969	270291786193848			X			X
TVAG_192620	Actin Depolymerizing Factor, Putative	Actin Filament Depolymerization	28598503112793	287178058624268	290818748474121	286396179199219	30236946105957	300420513153076	28521032333374	282348022460938	284454936981201	X	X	X	X		X	X
TVAG_213100	Conserved Hypothetical Protein	Uncharacterized	238298740386963	218368816375732	238048896789551	255187244415283	248832492828369	24887996673584	0	0	217620677947998			X				X
TVAG_389550	Gtp-Binding Protein (Q) Alpha-11 Subunit, Gna11, Putati	Signal Transduction	264395065307617	249334602355957	258050365447998	257274398803711	253541717529297	258439540863037	232427806854248	229704093933105	248629207611084		X	X	X		X	X
TVAG_464170	Enolase, Putative	Glycolytic Process	280564651489258	280177040100098	282005558013916	278420009613037	29033805847168	273213939666748	27197135925293	265454540252686	264403457641602	X	X	X	X		X
TVAG_006020	Vacuolar Atp Synthase Subunit Ac39, Putative	Ion Transport	269232044219971	262156391143799	268830871582031	270340175628662	26679895401001	2728515625	226287860870361	228498783111572	258614311218262	X	X	X	X		X	X
TVAG_046150	Hypothetical Protein	Uncharacterized	248929595947266	244875679016113	248706073760986	278741416931152	270316009521484	27467077255249	25164421081543	251368827819824	251876354217529		X	X	X		X	X
TVAG_070830	Cytidylate Kinase, Putative	Nucleobase-Containing Compound Metabolic Process	24985897064209	250893402099609	258382663726807	269518260955811	264948635101318	269125080108643	249225234985352	248560485839844	252710628509521			X	X		X	X
TVAG_245580	Conserved Hypothetical Protein	Uncharacterized	258582553863525	262790031433105	269544906616211	279810352325439	291101837158203	293158988952637	255117435455322	251089286804199	236654644012451	X			X	X	X
TVAG_371880	Actin, Putative	Arp2/3 Complex-Mediated Actin Nucleation	262078418731689	257689571380615	255806674957275	249940795898438	25534631729126	257140293121338	25751594543457	25720724105835	258134288787842		X	X	X		X
TVAG_407170	Myo-Inositol-1 Phosphate Synthase, Putative	Inositol Biosynthetic Process	263519325256348	258592281341553	263630752563477	286802654266357	263608493804932	277960643768311	250097942352295	244857883453369	254062309265137			X	X
TVAG_407250	Adenylyl Cyclase-Associated Protein, Putative	Cytoskeleton Organization	27001314163208	260718975067139	260580043792725	253207912445068	266137199401855	265737800598145	0	0	0			X	X		X	X
TVAG_408160	Ral, Putative	Signal Transduction	284003143310547	268680896759033	277164649963379	276685791015625	272697257995605	279181499481201	272600631713867	279187755584717	276933193206787		X	X	X		X	X
TVAG_414510;TVAG_142060	40S Ribosomal Protein S3A, Putative	Translation	265394611358643	274697189331055	262540912628174	261513175964355	259187984466553	256039657592773	25139461517334	261246509552002	27376335144043			X	X		X
TVAG_572140	Rho5 Protein, Putative	Small Gtpase Mediated Signal Transduction	276506843566895	268115196228027	274401550292969	27230318069458	276828441619873	27908618927002	259720668792725	259953956604004	262709560394287	X	X	X	X		X	X
TVAG_008770	Ubiquitin-Protein Ligase, Putative	Protein Polyubiquitination	219946231842041	0	231773986816406	254503555297852	234093761444092	239190711975098	0	0	0			X				X
TVAG_388550;TVAG_378180;TVAG_015780;TVAG_228300;TVAG_155060	60S Ribosomal Protein L12, Putative	Uncharacterized	264021053314209	278032283782959	286340885162354	270935573577881	265061702728271	263813438415527	246102046966553	247396965026855	259744091033936			X	X		X
TVAG_036010	A-Type Flavoprotein	Electron Transport Chain	260501575469971	266434764862061	265849151611328	0	227659969329834	225120029449463	0	0	0	X			X
TVAG_477470;TVAG_249740;TVAG_144550;TVAG_107720;TVAG_074480;TVAG_276180	60S Ribosomal Protein L10A, Putative	Uncharacterized	295812015533447	30965404510498	317134208679199	277111568450928	291270141601563	288761348724365	295271244049072	296759147644043	301766452789307			X	X		X
TVAG_092750	Glucokinase	Glycolytic Process	265104923248291	270905323028564	272763977050781	278123149871826	264072704315186	267781867980957	231273422241211	0	241803302764893			X	X		X
TVAG_100620	Profilin	Sequestering Of Actin Monomers	264340896606445	271191177368164	280462474822998	280773487091064	283750095367432	280132923126221	264286060333252	260559577941895	266383762359619	X	X	X	X		X	X
TVAG_191140	Conserved Hypothetical Protein	Carbohydrate Metabolic Process	252382316589355	257659511566162	259055461883545	233032665252686	234092464447021	256498489379883	244397430419922	239427070617676	259388313293457						X
TVAG_192540	Conserved Hypothetical Protein	Ubiquitin-Dependent Protein Catabolic Process	292344589233398	281393146514893	279468727111816	278269920349121	278815116882324	279626770019531	0	0	306285362243652			X	X
TVAG_226870;TVAG_484340	Conserved Hypothetical Protein	Carbohydrate Metabolic Process	250370788574219	242834091186523	258768482208252	0	221293087005615	222356700897217	0	0	0				X
TVAG_268050	Phosphoglycerate Kinase, Putative	Gluconeogenesis	280522212982178	272782592773438	277367973327637	280700454711914	290933055877686	287670497894287	242533531188965	263522529602051	262414722442627	X	X	X	X		X
TVAG_347250;TVAG_416010;TVAG_061890	60S Ribosomal Protein L18A, Putative	Translation	270172271728516	281141624450684	264199542999268	275285034179688	270503025054932	266618003845215	279422931671143	275455417633057	27163366317749		X	X
TVAG_368740	Ornithine Carbamoyltransferase, Putative	Cellular Amino Acid Metabolic Process	255299644470215	253549118041992	260802173614502	269804363250732	273864841461182	2688063621521	263980331420898	265533561706543	258578052520752			X	X
TVAG_388330	Cation-Transporting Atpase, Putative	Ion Transport	258155078887939	266189098358154	274508113861084	0	0	227798252105713	23154727935791	231305027008057	253174476623535	X			X		X	X
TVAG_412220	Malic Enzyme, Putative	Pyruvate Metabolic Process	276224746704102	291008167266846	304413433074951	264050636291504	25732234954834	259563980102539	264402828216553	253797092437744	266545810699463	X		X	X		X
TVAG_432040	Clan Sc, Family S28, Unassigned Serine Peptidase	Proteolysis	252830562591553	258709354400635	259350814819336	256599521636963	265944862365723	266290912628174	220380172729492	0	223918647766113			X			X	X
TVAG_491670	Malic Enzyme, Putative	Uncharacterized	284277439117432	278736133575439	285043067932129	273105144500732	277129287719727	278832607269287	276516418457031	276338806152344	27506275177002		X	X	X		X
TVAG_185180;TVAG_185170;TVAG_185160;TVAG_006170	60S Ribosomal Protein L19, Putative	Uncharacterized	261977367401123	264914112091064	258230609893799	273018207550049	260590572357178	264261283874512	264305686950684	265760021209717	273030395507813			X			X
TVAG_125550;TVAG_124190;TVAG_071700;TVAG_059650;TVAG_013060;TVAG_388910	Ribosomal Protein L3P, Putative	Translation	261062145233154	271021938323975	252060165405273	2644993019104	261742858886719	260359268188477	26566291809082	265264148712158	27258358001709			X
TVAG_029280	Chaperonin, Putative	Protein Folding	255792579650879	255374488830566	246989059448242	233205852508545	224606647491455	239144248962402	249920921325684	239045372009277	24582275390625			X	X		X
TVAG_054490	Tryptophanase, Putative	Cellular Amino Acid Metabolic Process	257141609191895	252768592834473	254760227203369	262307224273682	270275993347168	275687007904053	0	0	242938289642334			X	X		X
TVAG_076510	2-Amino-3-Ketobutyrate Coenzyme A Ligase, Putative	Biosynthetic Process	276966400146484	288240203857422	282969284057617	22685152053833	265813274383545	254782772064209	265890655517578	266412734985352	272629337310791				X		X	X
TVAG_177320	Conserved Hypothetical Protein	Uncharacterized	264490337371826	271813926696777	261103038787842	261505432128906	263857936859131	250082550048828	0	0	217029056549072	X		X	X		X	X
TVAG_213670	Conserved Hypothetical Protein	Uncharacterized	257270488739014	252088088989258	253153076171875	232486991882324	259475975036621	25730396270752	255932331085205	253431644439697	261827583312988	X		X	X		X
TVAG_222320	Wd-Repeat Protein, Putative	Actin Filament Organization	266484222412109	264799118041992	267027931213379	271440410614014	273466339111328	27935676574707	243389892578125	239671039581299	243204460144043		X	X	X
TVAG_253650	Malate Dehydrogenase, Putative	Tricarboxylic Acid Cycle	287860317230225	280174922943115	283684883117676	299983310699463	294147396087646	298171272277832	284476623535156	281174850463867	28307825088501		X	X	X		X
TVAG_272910	Transaldolase Total2, Putative	Carbohydrate Metabolic Process	250231838226318	245615081787109	254086303710938	276796951293945	258718757629395	265273399353027	242114849090576	243163776397705	247296199798584			X	X		X
TVAG_339720	Antigenic Protein P1, Putative	Uncharacterized	251598491668701	254612636566162	2536696434021	237016582489014	2347047996521	23785364151001	0	0	0	X			X			X
TVAG_340290	Malic Enzyme, Putative	Pyruvate Metabolic Process	276473941802979	283721466064453	303089962005615	260155487060547	216671333312988	244380302429199	0	0	254344081878662	X		X	X	X	X
TVAG_350520	Conserved Hypothetical Protein	Protein Transport To Vacuole Involved In Ubiquitin-Dependent Protein Catabolic Process Via The Multivesicular Body Sorting Pathway	24054573059082	231749935150146	237821674346924	270724487304688	256766452789307	255768661499023	242208137512207	0	248930072784424		X	X	X		X	X
TVAG_421580	Clathrin Coat Associated Protein Ap-50, Putative	Intracellular Protein Transport	246020698547363	250954704284668	261460819244385	250575084686279	249310283660889	252524509429932	246839427947998	249117317199707	252252330780029				X		X	X
TVAG_429360;TVAG_145570	Wd Repeat Domain, Putative	Positive Regulation Of Protein Phosphorylation	285684471130371	292455177307129	280792827606201	273213081359863	28086893081665	270163764953613	293786716461182	293550624847412	290936317443848			X	X		X
TVAG_473170	Calcium Binding Protein, Putative	Uncharacterized	258230609893799	254854507446289	264380149841309	267961254119873	27934103012085	281191177368164	259658718109131	259790859222412	269249038696289		X	X	X		X	X
TVAG_487600	Enolase, Putative	Glycolytic Process	253994998931885	251691703796387	257576847076416	262510776519775	259021224975586	256152648925781	221410846710205	218344917297363	215531406402588		X	X	X		X	X
TVAG_457430;TVAG_331660;TVAG_019240;TVAG_110140;TVAG_184170;TVAG_184180;TVAG_174190;TVAG_110540;TVAG_184140;TVAG_159980;TVAG_069570;TVAG_441960;TVAG_264700;TVAG_174180;TVAG_141620;TVAG_392380;TVAG_462990;TVAG_139710	Ubiquitin 1, Putative	Uncharacterized	295998153686523	297486953735352	299765090942383	307779998779297	298870868682861	302137298583984	291014175415039	291814880371094	295711631774902			X
TVAG_035180	Arp2/3 Complex Subunit, Putative	Regulation Of Actin Filament Polymerization	267248134613037	265863475799561	265074710845947	252720241546631	258503608703613	260251922607422	267513637542725	266005954742432	264825305938721			X	X		X
TVAG_038850	Conserved Hypothetical Protein	Uncharacterized	263352451324463	271214923858643	271107807159424	0	0	209822444915771	0	0	234521160125732	X			X		X	X
TVAG_337950;TVAG_306310;TVAG_302830;TVAG_215980;TVAG_189070;TVAG_140290	60S Ribosomal Protein L27E, Putative	Uncharacterized	252454319000244	257731647491455	25643009185791	267642059326172	25986047744751	26275562286377	256521472930908	257381763458252	253761367797852						X
TVAG_147050	Conserved Hypothetical Protein	Uncharacterized	256665210723877	257641792297363	266478729248047	0	0	0	0	0	0	X						X
TVAG_159730	Rab78, Putative	Uncharacterized	259143562316895	254075298309326	255128593444824	264043483734131	260499706268311	261284313201904	0	0	238939323425293		X	X	X		X	X
TVAG_162010	Leucine-Rich Repeat Protein, Bspa Family	Uncharacterized	239951572418213	250464344024658	251994037628174	251975688934326	251819610595703	246606311798096	0	0	0	X		X				X
TVAG_169070	Acid Phosphatase, Putative	Dephosphorylation	24099889755249	248935623168945	250791606903076	26471363067627	255190830230713	25655345916748	226266498565674	236588363647461	232119903564453		X		X			X
TVAG_183500	Succinate Thiokinase, Beta Subunit	Tricarboxylic Acid Cycle	269553775787354	264263362884521	262424907684326	198819332122803	199126472473145	227340717315674	22052848815918	228041610717773	232347507476807	X			X		X
TVAG_191500	Clan Ma, Family M8, Leishmanolysin-Like Protein	Proteolysis	247193660736084	2541037940979	252823486328125	234171237945557	229267101287842	225739688873291	0	0	0	X					X	X
TVAG_215920	Conserved Hypothetical Protein	Lipid Metabolic Process	269600276947021	259916591644287	263662128448486	273967266082764	274260635375977	281067943572998	252862319946289	253687629699707	255599632263184			X	X		X	X
TVAG_251260	14-3-3 Protein Sigma, Gamma, Zeta, Beta/Alpha, Putative	Signal Transduction	281773109436035	275636177062988	280108394622803	278359928131104	288137836456299	285312957763672	266900577545166	278081474304199	280649166107178		X	X	X
TVAG_437020;TVAG_291010	50S Ribosomal Protein L10E, Putative	Ribosomal Large Subunit Assembly	261019535064697	265752086639404	252259693145752	251775588989258	251094856262207	250940208435059	271979808807373	267727870941162	270473918914795			X			X
TVAG_293540	Family T1, Proteasome Alpha Subunit, Threonine Peptidase	Ubiquitin-Dependent Protein Catabolic Process	255724792480469	262600994110107	267074089050293	255705394744873	254538745880127	260374145507813	264622631072998	264288463592529	266518478393555			X	X		X
TVAG_400860	Clan Ma, Family M8, Leishmanolysin-Like Metallopeptidase	Proteolysis	252264823913574	249815044403076	255555515289307	271951656341553	265947704315186	268777141571045	264387454986572	262294940948486	265536060333252	X	X		X		X	X
TVAG_462480	Rho4, Putative	Actin Filament Organization	286316967010498	270194549560547	280678424835205	283187675476074	274118328094482	282173404693604	264194240570068	267158107757568	267702674865723	X		X	X		X	X
TVAG_580280	Rab6, Putative	Signal Transduction	279457015991211	265595550537109	275116386413574	282171096801758	28089168548584	286006298065186	265002384185791	27176456451416	272677631378174	X	X	X	X		X	X
TVAG_040870	Clan Ca, Family C1, Papain-Like Cysteine Peptidase	Proteolysis	257283992767334	261667976379395	259605350494385	260126094818115	268710308074951	264540004730225	0	0	0				X		X	X
TVAG_043070;TVAG_043060	Fructose-Bisphosphate Aldolase, Putative	Uncharacterized	284405517578125	283254737854004	283739738464355	29959888458252	303896675109863	302184734344482	27665397644043	27762622833252	277869968414307	X	X	X	X		X
TVAG_046430	Hypothetical Protein	Cell Migration	252851390838623	241874465942383	241572284698486	248570461273193	239716720581055	238652362823486	0	0	0				X
TVAG_140200	Conserved Hypothetical Protein	Ubiquitin-Dependent Protein Catabolic Process	255020008087158	238277435302734	244325618743896	245556106567383	236728191375732	246352787017822	0	0	0				X
TVAG_157210	Conserved Hypothetical Protein	Uncharacterized	280908336639404	286591491699219	286743488311768	298664836883545	287033882141113	28891918182373	282594356536865	285689907073975	286580257415771	X	X	X	X		X	X
TVAG_249080	Snare Proteins, Putative	Uncharacterized	263693962097168	258603897094727	265298004150391	2824049949646	283138904571533	281673908233643	264655055999756	264366493225098	259271659851074	X	X	X	X		X	X
TVAG_268070;TVAG_087240	Leucine-Rich Repeat Protein, Bspa Family	Uncharacterized	248757247924805	248147983551025	246622619628906	233242988586426	254214000701904	257770843505859	265736064910889	261593284606934	249118690490723	X					X	X
TVAG_333620	Wd-Repeatcontaining Protein, Putative	Actin Filament Depolymerization	254642601013184	250652561187744	259429969787598	239856357574463	258239345550537	254808673858643	236181812286377	240456027984619	236856002807617		X	X	X		X
TVAG_358360;TVAG_292640	Myo-Inositol-1 Phosphate Synthase, Putative	Inositol Biosynthetic Process	268188495635986	263530616760254	275526676177979	281613960266113	273894424438477	28968017578125	247268676757813	257527942657471	25384822845459			X	X		X
TVAG_376130	Gelsolin, Putative	Uncharacterized	256838359832764	256946620941162	261164436340332	25261589050293	238747406005859	242298603057861	0	0	0			X	X		X
TVAG_412780	Glyceraldehyde 3-Phosphate Dehydrogenase, Putative	Glucose Metabolic Process	288098335266113	274745998382568	283045635223389	286627864837646	28652702331543	294143962860107	268458938598633	267292308807373	265939159393311		X	X	X
TVAG_429930	Conserved Hypothetical Protein	Protein Folding	25371789932251	257014980316162	258844604492188	0	0	192417221069336	0	0	200561618804932				X		X
TVAG_436740	Conserved Hypothetical Protein	Actin Cytoskeleton Organization	252327537536621	239990348815918	251416854858398	255920639038086	252950897216797	250969581604004	0	0	232134456634521		X	X	X			X
TVAG_207430;TVAG_027320;TVAG_020530;TVAG_042520;TVAG_433250;TVAG_357930	60S Ribosomal Protein L36E, Putative	Uncharacterized	263456192016602	274176387786865	266672267913818	274284629821777	268211631774902	265748329162598	265283107757568	267272834777832	26764965057373				X		X
TVAG_025190	Tkl Family Protein Kinase	Protein Phosphorylation	243635921478271	222810745239258	239366989135742	233873233795166	234023666381836	242802257537842	0	0	0			X				X
TVAG_343970;TVAG_194850;TVAG_092870;TVAG_046840;TVAG_044560;TVAG_271230	50S Ribosomal Protein L5P, Putative	Uncharacterized	286043472290039	287915382385254	282497501373291	261537170410156	272494335174561	2647047996521	288042430877686	288806076049805	293569946289063			X			X
TVAG_064890	Alpha-L-Fucosidase, Putative	Carbohydrate Metabolic Process	245922355651855	256441650390625	252316188812256	223506755828857	227891712188721	225192222595215	0	0	0	X			X			X
TVAG_113670	Conserved Hypothetical Protein	Signal Transduction	244689273834229	222009601593018	247662792205811	261808624267578	247008113861084	260797290802002	0	0	237458114624023							X
TVAG_118780	Calmodulin, Putative	Uncharacterized	292887897491455	296061134338379	300071811676025	30955114364624	316653461456299	316646270751953	29899227142334	30188720703125	302276821136475		X	X	X		X	X
TVAG_121720	Clan Sc, Family S28, Unassigned Serine Peptidase	Proteolysis	256997528076172	260978832244873	253628578186035	263236618041992	262972087860107	257145004272461	220998573303223	0	218015193939209			X	X		X	X
TVAG_123110	Conserved Hypothetical Protein	Lipid Metabolic Process	266251945495605	258319759368896	259674777984619	263934574127197	265078029632568	264068641662598	0	0	235651168823242			X	X		X	X
TVAG_130730;TVAG_160390	Adenylate Kinase, Putative	Nucleobase-Containing Compound Metabolic Process	240301055908203	23822696685791	248726272583008	248265323638916	261276836395264	261256942749023	0	233698616027832	233452987670898			X	X		X	X
TVAG_140970	Ctl2, Putative	Transmembrane Transport	265872058868408	266120338439941	26947151184082	294990119934082	283506851196289	278540630340576	277584342956543	275187835693359	278968906402588	X	X	X	X		X	X
TVAG_159160	Profilin	Sequestering Of Actin Monomers	293598861694336	293799953460693	297068824768066	306768226623535	304635353088379	304201126098633	297192268371582	297953681945801	296704883575439		X	X	X		X	X
TVAG_186310;TVAG_185805	Leucine-Rich Repeat Protein, Bspa Family	Uncharacterized	229703903198242	223154792785645	238230857849121	249018249511719	25071325302124	255013637542725	242948093414307	236304531097412	238090190887451	X			X
TVAG_206040	Family T1, Proteasome Alpha Subunit, Threonine Peptidase	Ubiquitin-Dependent Protein Catabolic Process	256406383514404	263106861114502	270429134368896	256289806365967	254925594329834	260598411560059	2584299659729	261307506561279	262318210601807				X		X
TVAG_218800	Conserved Hypothetical Protein	Dephosphorylation	231372108459473	236026363372803	230307292938232	255044288635254	280348567962646	280589447021484	232092552185059	239643745422363	229785137176514	X	X				X
TVAG_227780	Carmil, Putative	Cell Migration	250439777374268	242400169372559	249226150512695	246410255432129	244486560821533	242469902038574	0	0	0			X				X
TVAG_237910	Conserved Hypothetical Protein	Uncharacterized	242187461853027	246709308624268	252198162078857	250839557647705	251679077148438	24439489364624	237019748687744	0	233443508148193	X	X				X
TVAG_267950	Lysyl-Trna Synthetase, Putative	Trna Aminoacylation For Protein Translation	24783166885376	241178321838379	242741947174072	25387882232666	256026630401611	252368469238281	0	0	231902828216553			X	X
TVAG_283620	Hypothetical Protein	Uncharacterized	260815391540527	248825969696045	258115196228027	249964942932129	251267585754395	253056335449219	225137157440186	229318218231201	252136001586914	X						X
TVAG_344880;TVAG_454470	Alcohol Dehydrogenase, Putative	Uncharacterized	254074974060059	26337100982666	260124607086182	234372062683105	28268030166626	280656356811523	234014549255371	234937496185303	231914882659912			X			X
TVAG_377380	Conserved Hypothetical Protein	Ubiquitin-Dependent Protein Catabolic Process	256315364837646	254886417388916	250026874542236	249195251464844	244587631225586	248368721008301	0	0	0			X	X
TVAG_393390;TVAG_564320	Conserved Hypothetical Protein	Uncharacterized	254394588470459	247491397857666	260030956268311	250067596435547	253172073364258	252936534881592	224152946472168	222821502685547	0	X		X	X		X
TVAG_426660	Clan Cd, Family C13, Legumain-Like Cysteine Peptidase	Proteolysis	271649971008301	270749015808105	27148120880127	257855396270752	255505123138428	263895072937012	271826248168945	271160469055176	267962493896484			X	X		X	X
TVAG_438870	Vacuolar Atp Synthase Subunit E, Putative	Ion Transport	26314546585083	252715263366699	262593097686768	281907005310059	269436893463135	271825294494629	250352764129639	2484206199646	252690296173096			X	X		X	X
TVAG_440600	Calicylin Binding Protein, Putative	Uncharacterized	255936317443848	255133113861084	256371879577637	273967266082764	273162231445313	276839828491211	248745059967041	247021865844727	253116054534912			X	X			X
TVAG_465250	Clan Sb, Family S8, Subtilisin-Like Serine Peptidase	Proteolysis	252841510772705	253441123962402	252124500274658	244287338256836	246797618865967	246660079956055	0	0	0	X			X		X	X
TVAG_466660	Chaperonin, Putative	Protein Folding	254724025726318	254260158538818	245623226165771	238228912353516	232141265869141	241270732879639	242366638183594	231583080291748	24541618347168			X	X		X
TVAG_475930	Conserved Hypothetical Protein	Uncharacterized	23733865737915	242228775024414	243647956848145	253966941833496	242040405273438	240888557434082	0	0	0	X					X	X
TVAG_021420	Coronin, Putative	Actin Filament Organization	240928115844727	237178516387939	243753070831299	261121940612793	253482055664063	255193538665771	227997817993164	0	0			X	X
TVAG_022370	Rho-Gtpase-Activating Protein, Putative	Signal Transduction	243641948699951	233783550262451	236159381866455	231120338439941	229011516571045	226894245147705	0	0	0				X			X
TVAG_026290	Oxysterol-Binding Protein, Putative	Sterol Transport	243819217681885	243797435760498	242471351623535	265829067230225	260471229553223	263601970672607	238826904296875	236361083984375	240626640319824			X	X		X
TVAG_056920	Conserved Hypothetical Protein	Uncharacterized	251040954589844	256259746551514	246050109863281	0	232003021240234	217706813812256	24519172668457	240650501251221	246926937103271				X		X	X
TVAG_072120	Conserved Hypothetical Protein	Uncharacterized	270844612121582	271588478088379	277960014343262	269817428588867	276100635528564	269056396484375	250857791900635	252300434112549	255745010375977	X	X	X	X		X	X
TVAG_075320	Vacuolar Proton Atpase, Putative	Ion Transport	265010604858398	253289947509766	264584197998047	26570858001709	257833671569824	265677299499512	0	0	227117729187012	X		X	X		X	X
TVAG_090100	Clan Ca, Family C1, Papain-Like Cysteine Peptidase	Proteolysis	283150997161865	291769790649414	291872577667236	289939918518066	282407264709473	291617565155029	289423198699951	29036979675293	281376056671143			X	X		X	X
TVAG_137880	Peptidyl-Prolyl Cis-Trans Isomerase A, Ppia, Putative	Protein Peptidyl-Prolyl Isomerization	26678014755249	266545810699463	270386295318604	265290699005127	275822620391846	264482765197754	256766166687012	258335456848145	252370281219482		X	X	X		X	X
TVAG_169740	Rab 19, 41 And, Putative	Vesicle-Mediated Transport	26698429107666	259938850402832	267905445098877	27697301864624	265115489959717	270520648956299	243771629333496	248606491088867	249266910552979		X	X	X		X	X
TVAG_174520	Neuroendocrine Differentiation Factor, Putative	Vacuolar Transport	24493444442749	241672191619873	249316139221191	285368251800537	270943622589111	266933860778809	247108287811279	245691204071045	248531951904297		X	X			X	X
TVAG_176230	Soluble Nsf Attacment Protein, Putative	Intracellular Protein Transport	253930644989014	251961421966553	255689182281494	264360771179199	269449195861816	264231338500977	229290046691895	230395069122314	249000282287598		X	X	X		X	X
TVAG_185830	Skd/Vacuolar Sorting, Putative	Vacuole Organization	239595184326172	229446201324463	243425884246826	273783206939697	264505596160889	261436519622803	234193115234375	232593994140625	232844676971436		X	X	X		X	X
TVAG_212500	Conserved Hypothetical Protein	Proteolysis	26064001083374	252172660827637	258927059173584	237176418304443	25431095123291	251103630065918	236778812408447	240170783996582	24072265625			X	X		X
TVAG_218820;TVAG_152090	Conserved Hypothetical Protein	Dephosphorylation	0	240951480865479	235044574737549	250204315185547	27829776763916	277607841491699	234422779083252	0	0	X	X				X
TVAG_256510	Clan Ca, Family C2, Calpain-Like Cysteine Peptidase	Proteolysis	25077938079834	23556604385376	240885314941406	252480754852295	24034646987915	246393699645996	0	0	220850830078125	X		X				X
TVAG_258220	Glycosyltransferase, Putative	Uncharacterized	239620819091797	248228416442871	260118637084961	234401245117188	245933742523193	238631572723389	0	0	0			X	X		X
TVAG_277590	Cation-Transporting Atpase, Putative	Ion Transport	251829090118408	257841167449951	254054203033447	233715896606445	245722465515137	233482723236084	0	0	0	X	X	X			X	X
TVAG_293080	Clan Ma, Family M8, Leishmanolysin-Like Protein	Proteolysis	253586387634277	257477321624756	257843170166016	233512420654297	223230895996094	229071445465088	238146018981934	235609245300293	239641990661621	X		X	X			X
TVAG_305400	Seryl-Trna Synthetase, Putative	Trna Aminoacylation For Protein Translation	253327217102051	245493965148926	251027755737305	265447025299072	259807205200195	271352596282959	248299713134766	241099643707275	249645957946777		X	X	X
TVAG_393400	Conserved Hypothetical Protein	Uncharacterized	248952732086182	259518032073975	263775272369385	251407108306885	256424026489258	254822845458984	0	0	0	X			X		X
TVAG_453150	Gtp-Binding Protein Alpha Subunit, Gna, Putative	Signal Transduction	249859828948975	239663124084473	247923831939697	265376415252686	254816074371338	259947471618652	242409629821777	234432888031006	245998020172119		X	X	X		X	X
TVAG_454160	Conserved Hypothetical Protein	Actin Cytoskeleton Organization	246262817382813	232365036010742	242710628509521	259628086090088	252708129882813	263620204925537	241038951873779	24485481262207	247148151397705		X	X	X		X	X
TVAG_480600	40S Ribosomal Protein Sa, Putative	Ribosomal Small Subunit Assembly	261561298370361	273720226287842	26568338394165	250354862213135	255794868469238	247746982574463	262239818572998	266113300323486	27001636505127			X	X
TVAG_492250	Profilin	Sequestering Of Actin Monomers	271574020385742	250041027069092	262735729217529	259045143127441	261078319549561	27123664855957	262087535858154	265538845062256	255420036315918	X	X	X	X		X	X
TVAG_182810;TVAG_177920;TVAG_156650;TVAG_094760;TVAG_036300;TVAG_036220;TVAG_020040	Ribosomal Protein S9, Putative	Uncharacterized	257111167907715	257426795959473	253956165313721	264749870300293	249759197235107	251200084686279	255433597564697	0	264043655395508			X			X
TVAG_021890	Vacuolar Atp Synthase Subunit E, Putative	Ion Transport	251237621307373	238499546051025	254008026123047	275780200958252	26552038192749	272549381256104	0	218136253356934	0			X	X		X	X
TVAG_058050	Family T1, Proteasome Alpha Subunit, Threonine Peptidase	Ubiquitin-Dependent Protein Catabolic Process	257473239898682	261308670043945	267055644989014	258925437927246	254662532806396	260451030731201	261816577911377	258716640472412	263876838684082				X		X
TVAG_395470;TVAG_121100;TVAG_401590;TVAG_243990	60S Ribosomal Protein L18, Putative	Uncharacterized	245013027191162	253730525970459	250296840667725	267087249755859	255996589660645	257570743560791	254782772064209	253675308227539	253362331390381			X	X			X
TVAG_169060	Gtpase_Rho, Putative	Small Gtpase Mediated Signal Transduction	270614700317383	263126277923584	268367748260498	268597011566162	267226009368896	270121192932129	258685359954834	256437511444092	26234582901001		X	X	X			X
TVAG_208470	Threonyl-Trna Synthetase, Putative	Translation	244056148529053	238788604736328	243920497894287	240377502441406	238566188812256	242198524475098	0	230582942962646	238580417633057			X	X		X
TVAG_212740	Phosphoglycerate Mutase, Putative	Glycolytic Process	280162181854248	278803443908691	277394390106201	296514701843262	290997638702393	29618839263916	286757965087891	287632236480713	289073886871338		X		X
TVAG_216170	Conserved Hypothetical Protein	Uncharacterized	252407455444336	247084617614746	257082786560059	244129314422607	245445098876953	231808471679688	0	0	0	X		X	X			X
TVAG_242850	Clan Ca, Family C1, Cathepsin L, S Or H-Like Cyst	Proteolysis	25244197845459	258200435638428	257204113006592	26198055267334	263140106201172	262488536834717	23870325088501	23389820098877	241341438293457			X			X	X
TVAG_324610	Arginyl-Trna Synthetase, Putative	Translation	252735195159912	250005836486816	253481712341309	240689086914063	256422653198242	252371387481689	247795658111572	237239036560059	248002548217773			X	X
TVAG_328600	Dock-10, Putative	Small Gtpase Mediated Signal Transduction	241217880249023	209627513885498	232364292144775	25107931137085	24260763168335	247575569152832	209165592193604	0	0			X				X
TVAG_334040	Leucyl-Trna Synthetase, Putative	Translation	243515796661377	214747180938721	242597579956055	248451290130615	244148693084717	24977840423584	203059673309326	209846096038818	20459939956665			X	X		X
TVAG_350040	Dynamin, Putative	Uncharacterized	245282649993896	232168369293213	231453666687012	234118328094482	227162609100342	237015514373779	0	0	0			X	X			X
TVAG_387630	Nicastrin Precursor, Putative	Protein Processing	24345027923584	248965682983398	248054809570313	23065673828125	236927471160889	226200389862061	0	0	226403961181641				X			X
TVAG_398750	F-Actin Capping Protein Beta Subunit, Putative	Cell Morphogenesis	24934720993042	0	257800922393799	268859977722168	255986938476563	26958589553833	243888339996338	240869941711426	24259256362915			X	X
TVAG_443530	Alpha-L-Fucosidase, Putative	Carbohydrate Metabolic Process	220953884124756	23655782699585	241501941680908	247134532928467	239253330230713	228918209075928	0	0	0	X			X
TVAG_452120	Gtp-Binding Protein Alpha Subunit, Gna, Putative	Signal Transduction	251117553710938	242200012207031	247259845733643	251689796447754	24541088104248	245095405578613	245710315704346	247209320068359	248486175537109		X	X	X		X	X
TVAG_466780	Conserved Hypothetical Protein	Cell Morphogenesis	242109661102295	226075649261475	240971584320068	232552261352539	0	231652870178223	0	0	0							X
TVAG_476020	Vesicular-Fusion Protein Nsf, Putative	Intra-Golgi Vesicle-Mediated Transport	242413997650146	234302024841309	244052906036377	252482929229736	254067516326904	253865013122559	0	0	215071716308594		X	X	X		X	X
TVAG_591330	Synaptotagmin, Putative	Uncharacterized	245364112854004	247757530212402	250138034820557	248773632049561	252857036590576	246327857971191	0	0	0				X
TVAG_069560	O-Linked N-Acetylglucosamine Transferase, Ogt, Putative	Protein Folding	252652435302734	241749324798584	246059169769287	262045440673828	2510693359375	262239818572998	238093128204346	238792343139648	239935169219971				X		X	X
TVAG_419520;TVAG_401900;TVAG_313300;TVAG_131850;TVAG_113950;TVAG_099560	30S Ribosomal Protein S17P, Putative	Uncharacterized	268968906402588	273769149780273	260632190704346	257192096710205	255618286132813	255004825592041	278439197540283	281226272583008	281518993377686			X			X
TVAG_110890;TVAG_484060;TVAG_344720;TVAG_447820;TVAG_070530;TVAG_026230;TVAG_434650	60S Ribosomal Protein L13A, Putative	Translation	265052909851074	280079040527344	263288059234619	272429084777832	269538249969482	266427879333496	270287570953369	270622940063477	272900886535645			X	X
TVAG_122850	Hypothetical Protein	Uncharacterized	229309005737305	216530723571777	24566858291626	253267002105713	237678966522217	241890316009521	0	0	0	X						X
TVAG_146960	Cyclophilin, Putative	Protein Peptidyl-Prolyl Isomerization	242075443267822	239059143066406	245072441101074	241758460998535	245819301605225	245575408935547	0	0	0						X	X
TVAG_276360;TVAG_200220;TVAG_148950;TVAG_159780	60S Ribosomal Protein L15, Putative	Uncharacterized	263422660827637	277154178619385	256286754608154	258335208892822	261119346618652	245540313720703	273661975860596	27440710067749	279715843200684			X			X
TVAG_152430;TVAG_205400	Lysyl-Trna Synthetase, Putative	Trna Aminoacylation For Protein Translation	25280969619751	246166667938232	250465183258057	247363452911377	253725872039795	249612426757813	0	0	237791652679443			X	X		X
TVAG_186390	Guanylate Cyclase, Putative	Cgmp Biosynthetic Process	245238456726074	0	246865634918213	0	0	220494956970215	0	0	0	X		X	X			X
TVAG_198110	Pyruvate-Flavodoxin Oxidoreductase, Putative	Response To Oxidative Stress	239559764862061	251317119598389	251150951385498	0	0	0	0	0	0	X			X		X
TVAG_228160	Coactosin, Putative	Regulation Of Actin Filament Polymerization	275159301757813	282950458526611	284152641296387	254915199279785	285338954925537	2820046043396	264904022216797	0	0			X	X		X	X
TVAG_249850	Rnase L Inhibitor, Putative	Ribosomal Subunit Export From Nucleus	235099029541016	229427242279053	221620788574219	221353645324707	23106517791748	217395420074463	237231750488281	234516143798828	23984245300293				X		X
TVAG_286460	Rab1, Putative	Signal Transduction	268672637939453	252373924255371	26688591003418	273359432220459	264246234893799	275392684936523	259112739562988	258348960876465	267165966033936		X	X	X		X	X
TVAG_291060	Conserved Hypothetical Protein	Uncharacterized	248082828521729	247201499938965	251484508514404	248909206390381	238231830596924	248738021850586	0	0	248666973114014		X	X	X			X
TVAG_333010	Conserved Hypothetical Protein	Lipid Metabolic Process	25033763885498	257520027160645	257955322265625	240085544586182	241798000335693	239923934936523	0	0	0				X		X	X
TVAG_347440	Annexin Vii, Putative	Uncharacterized	268675003051758	272219562530518	278631343841553	291049957275391	285067672729492	279863090515137	270645561218262	273174304962158	271068935394287				X		X	X
TVAG_361130;TVAG_304500;TVAG_230610;TVAG_601920;TVAG_525580	Glycerol-3-Phosphate Dehydrogenase, Putative	Carbohydrate Metabolic Process	253992385864258	253656959533691	246170043945313	214588890075684	222813014984131	202817268371582	0	0	0			X	X
TVAG_364050	Syntaxin Binding Protein-1,2,3, Putative	Intracellular Protein Transport	241014137268066	0	236556739807129	241213932037354	236769142150879	236617736816406	0	0	0		X	X	X			X
TVAG_364270;TVAG_350510	Chaperonin Containing T-Complex Protein 1	Protein Folding	26057674407959	252411079406738	244066543579102	244751873016357	241889572143555	245553188323975	24721923828125	246170043945313	248426856994629			X	X
TVAG_381690	Nad Dependent Epimerase/Dehydratase, Putative	Uncharacterized	258781356811523	258995895385742	252905979156494	256706867218018	264783554077148	268237171173096	271169395446777	270973796844482	274780006408691			X	X			X
TVAG_407760	1-O-Acylceramide Synthase, Putative	Lipid Metabolic Process	251779384613037	254595146179199	253273162841797	232480049133301	245462188720703	237404689788818	267714023590088	268354511260986	256970767974854
TVAG_432640	Gamma-Soluble Nsf Attachment Protein, Putative	Intracellular Protein Transport	248258533477783	248088703155518	25534423828125	258087482452393	258935852050781	260300216674805	0	0	0			X	X		X	X
TVAG_437930	Clan Mg, Familly M24, Aminopeptidase P-Like Metallop	Uncharacterized	258334255218506	256957244873047	260220203399658	26496753692627	268970069885254	268042736053467	264549579620361	261353378295898	267795658111572			X	X		X
TVAG_454490	Purine Nucleoside Phosphorylase, Putative	Nucleobase-Containing Compound Metabolic Process	251437873840332	254887943267822	261160869598389	250792827606201	273475646972656	289575939178467	248281803131104	245945720672607	262961406707764		X	X	X		X
TVAG_467970	Clan Ca, Family C1, Cathepsin L-Like Cysteine Peptidase	Proteolysis	284514808654785	288554306030273	295101108551025	291244277954102	288698844909668	291046466827393	275293235778809	27500207901001	27382698059082			X	X		X	X
TVAG_476350	Conserved Hypothetical Protein	Uncharacterized	251605796813965	248270645141602	252122287750244	258007984161377	262466812133789	260342483520508	246028614044189	252038536071777	248334007263184		X	X	X		X
TVAG_478270	Conserved Hypothetical Protein	Uncharacterized	234769191741943	0	229030666351318	242003765106201	224287967681885	229783210754395	0	219670524597168	230894374847412			X				X
TVAG_483410	Conserved Hypothetical Protein	Uncharacterized	259593200683594	250968780517578	259809379577637	270555858612061	256741943359375	257436046600342	260792827606201	252752246856689	260723266601563	X		X			X	X
TVAG_487750;TVAG_484180;TVAG_371270;TVAG_104490;TVAG_005910	Ribosomal Protein L2, Putative	Uncharacterized	250301055908203	24237174987793	238602237701416	248715000152588	241196537017822	25612117767334	258811264038086	258008232116699	257590065002441			X			X
TVAG_462530;TVAG_006250	30S Ribosomal Protein S8, Putative	Uncharacterized	268182411193848	279685115814209	280066204071045	253620204925537	260749626159668	256580181121826	26616247177124	263437404632568	271056957244873			X	X
TVAG_010520	Lim Domain, Putative	Uncharacterized	25035737991333	250341854095459	261669692993164	253300552368164	251997776031494	246690921783447	232714195251465	0	241483345031738		X	X				X
TVAG_495360;TVAG_173990;TVAG_139990;TVAG_010560;TVAG_259540	30S 40S Ribosomal Protein, Putative	Uncharacterized	247275428771973	253899841308594	24481237411499	261128902435303	245608673095703	254784317016602	0	24280933380127	246262817382813			X
TVAG_474010;TVAG_453470;TVAG_314730;TVAG_291460;TVAG_258150;TVAG_247060;TVAG_040820	40S Ribosomal Protein S17, Putative	Uncharacterized	250290946960449	260618190765381	255347499847412	256190204620361	249055938720703	24632230758667	256486415863037	258110790252686	259049282073975			X			X
TVAG_057000	Clan Ca, Family C1, Papain-Like Cysteine Peptidase	Proteolysis	254053230285645	27420934677124	274009666442871	272073211669922	269814167022705	272980651855469	264768257141113	261516075134277	249375972747803			X	X		X	X
TVAG_063900	Conserved Hypothetical Protein	Uncharacterized	243193454742432	205932273864746	236153774261475	22566255569458	234873847961426	241705074310303	0	0	215103626251221							X
TVAG_430260;TVAG_305300;TVAG_249090;TVAG_198620;TVAG_159830;TVAG_109730;TVAG_109530;TVAG_071920	40S Ribosomal Protein S23, Putative	Uncharacterized	255019092559814	265044288635254	257574806213379	261865787506104	257335815429688	258194599151611	258374729156494	263968734741211	262533702850342			X	X		X
TVAG_473910;TVAG_296170;TVAG_109440;TVAG_083260	60S Ribosomal Protein L17, Putative	Uncharacterized	253826808929443	252421264648438	25333028793335	249950275421143	24555025100708	252410354614258	255478382110596	25583740234375	258538856506348			X			X
TVAG_103780	Family T1, Proteasome Alpha Subunit, Threonine Peptidase	Ubiquitin-Dependent Protein Catabolic Process	252002277374268	25001485824585	255711765289307	246755142211914	244429740905762	248850193023682	253406887054443	251561489105225	257556228637695				X		X
TVAG_139320;TVAG_151620	Heat Shock Protein, Putative	Protein Folding	254636993408203	224579620361328	238352813720703	242975406646729	24707145690918	253298511505127	229519290924072	0	229215068817139			X	X		X
TVAG_196620	Conserved Hypothetical Protein	Uncharacterized	274965572357178	276456089019775	277773094177246	280820274353027	293209838867188	284477024078369	27289119720459	275780200958252	270791797637939		X	X	X		X	X
TVAG_197710	Conserved Hypothetical Protein	Uncharacterized	256507244110107	256408042907715	260663433074951	270796890258789	267477836608887	270646591186523	2234792137146	0	0				X		X	X
TVAG_202040	Gtpase_Rho, Putative	Signal Transduction	253690967559814	238856716156006	246653022766113	248710765838623	248573780059814	252073211669922	0	0	0		X	X	X		X	X
TVAG_203620	Rubisco Subunit Binding-Protein Alpha Subunit, Ruba	Protein Folding	246055774688721	258869037628174	264826068878174	225917434692383	209619045257568	214528713226318	0	0	0	X			X		X
TVAG_211840	Conserved Hypothetical Protein	Uncharacterized	250202198028564	222847785949707	248260459899902	263037204742432	254971351623535	254932918548584	0	0	231623859405518			X
TVAG_261210	Clan Cd, Family C14, Metacaspase-Like Cysteine Peptidase	Uncharacterized	263824329376221	257466564178467	263004417419434	257984275817871	264192485809326	265768661499023	245608081817627	0	258701839447021			X	X		X	X
TVAG_262730	60S Ribosomal Protein L14, Putative	Translation	271369228363037	286992568969727	286040992736816	278774814605713	274300594329834	267013397216797	272074146270752	265722904205322	274509696960449			X	X		X
TVAG_293660	Conserved Hypothetical Protein	Uncharacterized	260094528198242	266225452423096	267758026123047	259990558624268	275867767333984	2788942527771	27255838394165	272409076690674	267535343170166	X			X	X	X
TVAG_296070	Myosin Heavy Chain, Cardiac Muscle Alpha Isoform, Puta	Uncharacterized	251279792785645	246653575897217	250710372924805	228867511749268	233398723602295	249814167022705	0	0	223220443725586			X	X		X	X
TVAG_301380	Gtp-Binding Protein Alpha Subunit, Gna, Putative	Signal Transduction	248518619537354	22001407623291	243759708404541	250410537719727	240354022979736	251414127349854	0	227669868469238	225631618499756		X	X	X			X
TVAG_302570	Clan Ca, Family C1, Cathepsin L-Like Cysteine Peptidase	Proteolysis	259819831848145	270886116027832	267503433227539	273701114654541	277667350769043	273922290802002	0	0	0				X		X	X
TVAG_303600	Chaperonin Containing T-Complex Protein 1	Protein Folding	257725353240967	254616394042969	246275062561035	241143398284912	233757057189941	239209804534912	241895599365234	25490478515625	243863372802734				X		X
TVAG_305730;TVAG_150550	Chaperone Protein Dnaj, Putative	Protein Folding	248655662536621	243935546875	253246421813965	256468296051025	251890697479248	250943431854248	226199054718018	0	227228832244873			X	X			X
TVAG_315940	Conserved Hypothetical Protein	Uncharacterized	254137706756592	0	258923587799072	277650909423828	269961490631104	266465015411377	267502155303955	263018379211426	268980445861816	X			X		X	X
TVAG_329350;TVAG_456910	Rab5, Putative	Intracellular Protein Transport	244502925872803	0	239980030059814	242777462005615	239179801940918	247245807647705	232198524475098	241500396728516	246401977539063		X	X	X		X	X
TVAG_340510	Aspartate--Ammonia Ligase, Putative	Asparagine Biosynthetic Process	257604789733887	251926097869873	250707511901855	245484561920166	259498023986816	249558887481689	248455581665039	241186237335205	248682060241699			X	X		X
TVAG_340550	Amp Dependent Ligase, Putative	Long-Chain Fatty Acid Metabolic Process	237332439422607	250678825378418	255394611358643	0	0	0	0	22176851272583	238107833862305				X		X	X
TVAG_351500	Rab7, Putative	Vesicle Docking Involved In Exocytosis	247719306945801	242692089080811	249877624511719	258411502838135	252980308532715	250766353607178	0	0	235687141418457	X	X	X	X		X	X
TVAG_357210	Rho5 Protein, Putative	Actin Filament Organization	260739822387695	253712577819824	255605163574219	252531719207764	255818729400635	257096977233887	25196704864502	248731441497803	253887023925781			X	X			X
TVAG_367420	Conserved Hypothetical Protein	Uncharacterized	238126449584961	232217712402344	240489311218262	244203414916992	228586692810059	22295524597168	0	0	0		X	X				X
TVAG_391100	Clan Ma, Family M8, Leishmanolysin-Like Metallopeptidase	Proteolysis	233073024749756	0	237471446990967	259281826019287	248689136505127	257613677978516	241010131835938	24494176864624	247910404205322	X			X			X
TVAG_425470	Conserved Hypothetical Protein	Uncharacterized	257093830108643	262795715332031	270279140472412	259899940490723	274150619506836	278966598510742	249776229858398	252010135650635	0	X			X		X
TVAG_430280	Conserved Hypothetical Protein	Uncharacterized	247391300201416	251568813323975	257742462158203	265484848022461	263469886779785	265156745910645	0	0	0				X		X	X
TVAG_454380	14-3-3 Protein Sigma, Gamma, Zeta, Beta/Alpha, Putative	Signal Transduction	27476146697998	27034122467041	274851589202881	275380115509033	278869285583496	274908313751221	266706066131592	268414611816406	270282306671143		X	X	X		X
TVAG_459530	Vacuolar Sorting Protein Snf7, Putative	Vesicle Budding From Membrane	256058883666992	253204116821289	25675594329834	284680480957031	276523265838623	273271446228027	260434551239014	262473526000977	262507343292236		X	X	X		X	X
TVAG_470240;TVAG_470230	Conserved Hypothetical Protein	Uncharacterized	261305332183838	247780113220215	250284633636475	259905776977539	260900478363037	265725078582764	0	0	23316032409668		X	X			X
TVAG_477640	Conserved Hypothetical Protein	Uncharacterized	264367122650146	268079624176025	272892093658447	272838325500488	291133422851563	285924205780029	0	0	0	X			X		X
TVAG_478320	Glucosamine-Fructose-6-Phosphate Aminotransferase, Pu	Fructose 6-Phosphate Metabolic Process	226266040802002	225681591033936	231352081298828	22751012802124	0	220260066986084	0	0	0				X
TVAG_494490;TVAG_595020;TVAG_604430;TVAG_579240;TVAG_407980	Clan Ma, Family M8, Leishmanolysin-Like Metallopeptidase	Proteolysis	244866485595703	240371627807617	253466854095459	273311672210693	278903541564941	272767524719238	269988422393799	274182033538818	27109884262085	X						X
TVAG_539120;TVAG_296100	Conserved Hypothetical Protein	Uncharacterized	293393249511719	281050453186035	285190467834473	285794944763184	281332511901855	289470386505127	270595111846924	284960613250732	28825325012207	X	X	X	X		X	X
TVAG_000880	Clan Ma, Family M8, Leishmanolysin-Like Metallopeptidase	Proteolysis	249404220581055	255402011871338	259358901977539	24869478225708	261583862304688	254276161193848	0	0	0	X		X	X			X
TVAG_006140;TVAG_273380	6-Phosphogluconate Dehydrogenase, Putative	Pentose-Phosphate Shunt	235886363983154	236410789489746	236978454589844	248587532043457	249608001708984	253867645263672	0	0	0				X		X
TVAG_017960	Conserved Hypothetical Protein	Ion Transport	25542387008667	253992710113525	258484039306641	259523601531982	262670116424561	26105396270752	270066738128662	270211505889893	271495742797852	X					X
TVAG_038640	Atp Synthase Subunit D, Putative	Ion Transport	257903461456299	244513626098633	257710990905762	263119869232178	258079376220703	265148773193359	247530746459961	251486434936523	0			X	X		X	X
TVAG_047990	Glutaminyl-Trna Synthetase, Putative	Translation	246966781616211	229292945861816	242526302337646	245593509674072	249788017272949	251552619934082	219820709228516	212339172363281	0	X	X	X	X		X
TVAG_053680	Prolyl-Trna Synthetase, Putative	Trna Aminoacylation For Protein Translation	248841819763184	240748805999756	244043159484863	23871265411377	251753520965576	24594856262207	243037548065186	242734832763672	0				X
TVAG_054830	Phosphoglucomutase, Putative	Carbohydrate Metabolic Process	240371627807617	246181812286377	243049392700195	25497501373291	255403480529785	264323711395264	239652557373047	0	242248649597168		X	X	X
TVAG_062520	Cyclophilin, Putative	Protein Peptidyl-Prolyl Isomerization	24474817276001	265787391662598	26511079788208	235186939239502	233593082427979	239275054931641	0	0	0				X			X
TVAG_069450	Copine, Putative	Cellular Response To Calcium Ion	236379890441895	235400238037109	24056640625	252026958465576	245612754821777	24575309753418	0	0	0			X	X			X
TVAG_087670	Conserved Hypothetical Protein	Uncharacterized	233417739868164	0	234600143432617	225444393157959	231681842803955	233263568878174	0	0	0	X		X				X
TVAG_590550;TVAG_104250	Conserved Hypothetical Protein	Uncharacterized	256828441619873	248186054229736	261297492980957	248426361083984	249392127990723	238106861114502	0	0	0	X		X	X
TVAG_108920	Conserved Hypothetical Protein	Uncharacterized	270500946044922	274004783630371	280177574157715	275324478149414	308193988800049	299919948577881	292453136444092	287164974212646	28702693939209	X			X
TVAG_426530;TVAG_111510	Conserved Hypothetical Protein	Uncharacterized	242273654937744	241929492950439	235757713317871	270147819519043	24928861618042	259739723205566	245326709747314	0	236705532073975				X
TVAG_147070	Chaperonin Containing T-Complex Protein	Protein Folding	24977840423584	244878749847412	243546752929688	232476997375488	228515186309814	242109661102295	240581283569336	24333812713623	239862442016602				X		X
TVAG_165340	Succinate Thiokinase A Subunit	Tricarboxylic Acid Cycle	269674129486084	274766101837158	263283100128174	0	0	236138038635254	240549030303955	250697689056396	25581844329834		X					X
TVAG_173930	Conserved Hypothetical Protein	Uncharacterized	237242164611816	0	23712194442749	236324520111084	230176391601563	236105422973633	0	0	0	X						X
TVAG_185080	Ran, Putative	Ribosomal Subunit Export From Nucleus	259291095733643	263752746582031	261824169158936	252854919433594	257766571044922	259714965820313	26356372833252	261391487121582	26822135925293			X	X
TVAG_190510	Gtp-Binding Protein Rit, Putative	Signal Transduction	25258394241333	0	247307071685791	253870277404785	243658638000488	254024963378906	239593410491943	0	245251007080078	X	X	X	X			X
TVAG_191130	Conserved Hypothetical Protein	Uncharacterized	252070217132568	237018699645996	237236957550049	226890182495117	230473003387451	23418025970459	0	0	0				X		X
TVAG_197690	Gtpase_Rho, Putative	Actin Filament Organization	250687446594238	239400196075439	242085113525391	253014545440674	244252166748047	244399967193604	0	0	232214469909668		X	X	X		X	X
TVAG_199270	60S Ribosomal Protein L7A, Putative	Maturation Of Lsu-Rrna	280901279449463	285961227416992	283622303009033	28649450302124	28459358215332	281251430511475	288342456817627	280945129394531	288781242370605			X
TVAG_222920	Purine Nucleoside Phosphorylase I, Putative	Nucleobase-Containing Compound Metabolic Process	23889575958252	244505443572998	248470420837402	260396957397461	263244190216064	258850193023682	236750831604004	243273849487305	253587055206299			X	X		X
TVAG_231250	60S Ribosomal Protein L21, Putative	Translation	256613388061523	261806716918945	248705596923828	261295127868652	251535224914551	260793018341064	0	0	0			X	X
TVAG_231360	Family T1, Proteasome Beta Subunit, Threonine Peptidase	Proteasomal Protein Catabolic Process	248606491088867	247257251739502	254992656707764	242774620056152	242743358612061	24771427154541	240824527740479	244231643676758	25151704788208				X		X
TVAG_234160	Arp2/3 Complex 20 Kd Subunit, Putative	Actin Filament Polymerization	249241561889648	252754745483398	265741844177246	251277027130127	255084228515625	254243507385254	0	0	247258281707764
TVAG_239650	Conserved Hypothetical Protein	Uncharacterized	267803173065186	277796897888184	283639430999756	0	280372676849365	270720405578613	300546550750732	300844879150391	293009033203125	X	X	X			X
TVAG_260390;TVAG_527570	Vab10 Spectraplakin, Putative	Uncharacterized	252081775665283	2475026512146	254361248016357	254115753173828	256069889068604	249517593383789	0	0	229775714874268	X			X			X
TVAG_263740	Enolase, Putative	Glycolytic Process	251929111480713	248582801818848	251205234527588	250192852020264	254317646026611	247811183929443	25235933303833	238109798431396	248698539733887			X	X		X
TVAG_265530	Conserved Hypothetical Protein	Uncharacterized	262501029968262	27016695022583	267609100341797	24816068649292	26272575378418	249918746948242	275776596069336	268636054992676	263616199493408				X
TVAG_386300;TVAG_371250;TVAG_371240;TVAG_272980;TVAG_272970;TVAG_272960	40S Ribosomal Protein S24, Putative	Uncharacterized	246647605895996	244441738128662	240113735198975	251410617828369	238693828582764	242797298431396	0	237228622436523	0			X			X
TVAG_274130	Lim Domain, Putative	Uncharacterized	236540336608887	243545417785645	249419002532959	235404968261719	0	0	0	0	0			X				X
TVAG_275520	Conserved Hypothetical Protein	Ion Transport	249642429351807	246754608154297	251796855926514	254745388031006	255349578857422	264524459838867	0	0	0	X						X
TVAG_331320	Vesicle Transport V-Snare Protein Vti1A, Putative	Intracellular Protein Transport	257252826690674	258208961486816	259204349517822	270297050476074	273534660339355	275759296417236	243929653167725	243355865478516	245189342498779	X	X	X	X		X	X
TVAG_342610	Interferon-Induced, Double-Stranded Rn	Histidyl-Trna Aminoacylation	233226490020752	23056526184082	233923110961914	230301895141602	234450588226318	231310520172119	229185981750488	0	0			X	X		X
TVAG_363990	Conserved Hypothetical Protein	Intracellular Protein Transport	244812984466553	244605770111084	251568050384521	262201671600342	257792644500732	25820068359375	0	0	240480995178223	X		X	X			X
TVAG_366360	Conserved Hypothetical Protein	Uncharacterized	266183490753174	268878574371338	271515121459961	270437469482422	275949840545654	271794967651367	256044750213623	260170574188232	263666801452637		X	X	X		X	X
TVAG_369130;TVAG_372830;TVAG_527690;TVAG_511300;TVAG_533390	Conserved Hypothetical Protein	Uncharacterized	252511501312256	257420883178711	262676200866699	256603603363037	266511631011963	259539356231689	0	0	0	X			X
TVAG_371220;TVAG_371230	Ribonucleoprotein, Chloroplast, Putative	Uncharacterized	24707462310791	251577301025391	256726036071777	26083345413208	255386333465576	257432441711426	24163537979126	243397369384766	252736263275146			X	X		X
TVAG_394240	Conserved Hypothetical Protein	Cell Morphogenesis	226740283966064	213254241943359	223976993560791	236153774261475	22808292388916	23269136428833	0	0	0							X
TVAG_396480	Conserved Hypothetical Protein	Ubiquitin-Dependent Protein Catabolic Process	253335399627686	234636363983154	237955074310303	231232891082764	231644287109375	237547073364258	243405513763428	245965061187744	24554967880249				X
TVAG_397320	Adenosine Diphosphatase, Putative	Nucleoside Diphosphate Catabolic Process	246907253265381	244254722595215	246606864929199	21350191116333	0	0	0	0	0	X		X				X
TVAG_407150;TVAG_419690	Arp2/3 Complex 16 Kd Subunit, Putative	Regulation Of Actin Filament Polymerization	257935733795166	254461002349854	262203884124756	2601784324646	257511596679688	268452949523926	0	0	0				X		X
TVAG_063450;REV__TVAG_130180	Conserved Hypothetical Protein	Cell Morphogenesis	242055320739746	226194801330566	235847434997559	235801486968994	0	235553188323975	0	0	0				X		X	X
TVAG_414560	Dtdp-Glucose 4,6-Dehydratase, Putative	Nucleotide-Sugar Metabolic Process	244538745880127	239798049926758	235138835906982	231888809204102	23158863067627	240433502197266	242689228057861	242200756072998	244183464050293				X
TVAG_438370;TVAG_423320;TVAG_112230	60S Ribosomal Protein L13, Putative	Translation	25124828338623	263088130950928	253436050415039	273094730377197	263210144042969	262625026702881	0	246487236022949	0
TVAG_498560	Secretory Carrier Membrane Protein, Putative	Protein Transport	252293109893799	256636199951172	249654312133789	249256496429443	246654109954834	239884986877441	0	0	0	X						X
TVAG_498650	Conserved Hypothetical Protein	Uncharacterized	234795112609863	240822906494141	241105213165283	227992076873779	234755592346191	228906707763672	0	0	0	X			X		X	X
TVAG_528800	Rab-2,4	Vesicle-Mediated Transport	234974098205566	237178516387939	242380504608154	240751247406006	251527500152588	248594169616699	230749454498291	0	230902614593506				X			X
TVAG_529190	Conserved Hypothetical Protein	Uncharacterized	245436267852783	250016994476318	259914855957031	271321239471436	290186862945557	290762271881104	0	0	239427967071533	X			X	X
TVAG_547230;TVAG_486360;TVAG_010930	Adaptin, Alpha/Gamma/Epsilon, Putative	Intracellular Protein Transport	238829708099365	227265663146973	24418025970459	239781475067139	238613586425781	250004978179932	231099014282227	0	221070613861084	X		X	X
TVAG_576970;TVAG_051440	Conserved Hypothetical Protein	Uncharacterized	250756149291992	25215934753418	252801189422607	241933250427246	24329439163208	241119556427002	255024261474609	247738437652588	246456489562988		X		X			X
TVAG_000810	Conserved Hypothetical Protein	Uncharacterized	247749500274658	228639507293701	233806018829346	249001655578613	248428764343262	245912075042725	0	0	0			X	X
TVAG_345450;TVAG_345440;TVAG_345430;TVAG_074940;TVAG_024110;TVAG_015800	50S Ribosomal Protein L14P, Putative	Uncharacterized	242508983612061	0	234926509857178	23880729675293	236427326202393	24012056350708	0	0	0			X
TVAG_016670	Gtp-Binding Protein, Putative	Uncharacterized	244284782409668	236527233123779	235895519256592	240016136169434	237045097351074	240304431915283	232123165130615	243452301025391	239198894500732			X	X		X	X
TVAG_020780	Sphingomyelin Phosphodiesterase, Putative	Uncharacterized	238345108032227	244720916748047	24496374130249	0	0	0	0	0	0	X		X				X
TVAG_353710;TVAG_026460	60S Ribosomal Protein L14, Putative	Translation	260735530853271	270821285247803	271189212799072	267801914215088	260403232574463	262899475097656	261528453826904	25485818862915	260743083953857			X	X		X
TVAG_036210	Nascent Polypeptide Associated Complex Alpha Subun	Protein Targeting To Membrane	257103824615479	259659385681152	263497257232666	281962451934814	281374111175537	28431095123291	251733322143555	25736629486084	257911167144775		X	X	X		X	X
TVAG_050230	Lim Domain, Putative	Uncharacterized	242559471130371	0	245103874206543	258057994842529	257136631011963	253643608093262	0	0	0							X
TVAG_435430;TVAG_206300;TVAG_164160;TVAG_066030	40S Ribosomal Protein S8, Putative	Uncharacterized	257595901489258	261548938751221	252518367767334	277128620147705	267022647857666	270066738128662	25878345489502	261938705444336	255853729248047		X	X	X		X
TVAG_070550	Syntaxin, Putative	Intracellular Protein Transport	259085731506348	24214822769165	249121417999268	260362415313721	255043067932129	261376247406006	250021305084229	253908367156982	254618587493896	X	X	X	X		X	X
TVAG_082990	Hypothetical Protein	Uncharacterized	237235908508301	0	238949508666992	262508068084717	255658721923828	265887794494629	0	0	0			X	X		X	X
TVAG_090090	Clan Mh, Family M20, Peptidase T-Like Metallopeptidase	Proteolysis	249451656341553	23979455947876	256568737030029	264135456085205	268736133575439	275440692901611	240099220275879	226892738342285	249328308105469			X	X		X
TVAG_098000	Conserved Hypothetical Protein	Uncharacterized	231604633331299	229065017700195	23300895690918	224244213104248	0	0	0	0	0
TVAG_106750;TVAG_418120	Clan M-, Family M49, Dipeptidylpeptidase Iii-L	Proteolysis	245429172515869	242193355560303	25239107131958	270836505889893	265424900054932	273578338623047	246722793579102	235438022613525	249832878112793				X		X
TVAG_110010	Conserved Hypothetical Protein	Uncharacterized	256944484710693	258903656005859	262489814758301	270176525115967	26487154006958	262009201049805	246820678710938	256135807037354	249217967987061			X	X		X
TVAG_117470	Protein Disulfide Isomerase, Putative	Protein Folding	262632732391357	276691207885742	260475997924805	0	217244663238525	223544750213623	0	0	242268505096436				X		X	X
TVAG_118810	Conserved Hypothetical Protein	Signal Transduction	236675243377686	22533597946167	228378810882568	226193466186523	228535766601563	229796829223633	0	0	0			X				X
TVAG_128990	Conserved Hypothetical Protein	Intracellular Protein Transport	270452060699463	0	265977573394775	272525939941406	273429946899414	27583194732666	0	0	276307601928711			X	X			X
TVAG_144390	Conserved Hypothetical Protein	Uncharacterized	252065391540527	250461444854736	251683292388916	263190002441406	257447090148926	258993587493896	0	0	0				X		X	X
TVAG_149710	Conserved Hypothetical Protein	Dephosphorylation	239989490509033	236943416595459	240783042907715	258384838104248	248003044128418	25104736328125	245744438171387	0	251720352172852
TVAG_149750	Conserved Hypothetical Protein	Uncharacterized	0	241522083282471	238774566650391	234450588226318	239765739440918	236704444885254	0	0	0							X
TVAG_152400	Family T1, Proteasome Beta Subunit, Threonine Peptidase	Proteasomal Protein Catabolic Process	253646945953369	251104030609131	254412002563477	241240787506104	239534931182861	248231830596924	0	0	263971347808838				X		X
TVAG_164890;TVAG_393850	Acetyl-Coa Hydrolase, Putative	Acetate Metabolic Process	237153396606445	246749210357666	260204734802246	0	0	20711877822876	0	0	0	X			X
TVAG_165690;TVAG_165610	Peroxiredoxin, Putative	Uncharacterized	254490013122559	246236057281494	244638233184814	250788745880127	249533596038818	256390933990479	0	0	0			X	X
TVAG_172060	Hypothetical Protein	Uncharacterized	0	0	231645202636719	257565650939941	24669038772583	245168323516846	238866024017334	0	244559459686279		X	X	X			X
TVAG_178580	Alpha-Amylase, Putative	Carbohydrate Metabolic Process	242292728424072	242253074645996	251172370910645	243432655334473	248142108917236	248521957397461	0	0	0				X
TVAG_184300	Conserved Hypothetical Protein	Uncharacterized	238732376098633	238497638702393	244830226898193	257339420318604	255040340423584	260692367553711	0	0	0			X	X			X
TVAG_185200	Family T1, Proteasome Alpha Subunit, Threonine Peptidase	Ubiquitin-Dependent Protein Catabolic Process	254158363342285	261071929931641	263950119018555	259026756286621	255372695922852	255553760528564	263770809173584	260745544433594	264059391021729				X		X
TVAG_186300	Leucine-Rich Repeat Protein, Bspa Family	Uncharacterized	228145637512207	225909900665283	241759223937988	251252212524414	252486553192139	258335208892822	241093273162842	240391731262207	233734512329102	X			X		X
TVAG_192480	60S Ribosomal Protein L35A, Putative	Cytoplasmic Translation	26531005859375	0	0	27678150177002	273262023925781	266609859466553	27341552734375	0	270009918212891				X			X
TVAG_494060;TVAG_474670;TVAG_331690;TVAG_212240;TVAG_192910;TVAG_072050;TVAG_213810;TVAG_005920	Ribosomal Protein L30, Putative	Uncharacterized	255737209320068	256684703826904	254766712188721	239001197814941	241758460998535	242432174682617	25694766998291	0	265205688476563			X	X		X
TVAG_196700	Glutamate Dehydrogenase, Putative	Cellular Amino Acid Metabolic Process	230035018920898	231521301269531	24471471786499	262299327850342	281027946472168	299519920349121	240934562683105	249458351135254	252590770721436			X	X		X
TVAG_214830	Uridine Cytidine Kinase I, Putative	Phosphorylation	243380374908447	22804141998291	232552261352539	226995410919189	226301422119141	227698955535889	0	0	0			X	X
TVAG_218790;TVAG_259750;TVAG_009280	Conserved Hypothetical Protein	Dephosphorylation	0	0	0	237695121765137	260439968109131	259574604034424	0	0	0	X	X		X
TVAG_220990	Chaperone Binding Protein, Putative	Protein Folding	254998435974121	223983001708984	248624000549316	25928861618042	247463760375977	265539569854736	221191787719727	223835315704346	206833744049072				X			X
TVAG_224120	Conserved Hypothetical Protein	Transport	238258037567139	244398078918457	241049365997314	248879508972168	24613748550415	250431423187256	0	0	0							X
TVAG_238350	Phosphatidylinositol Transfer Protein, Putative	Phospholipid Transport	256643810272217	247587261199951	249730739593506	247070407867432	249486446380615	244904479980469	0	0	0			X	X		X	X
TVAG_247230	Hypothetical Protein	Uncharacterized	242919330596924	23508695602417	234026260375977	237446823120117	218719234466553	224681930541992	0	0	0				X			X
TVAG_266630	Methionine-Trna Synthetase, Putative	Translation	243695278167725	233242988586426	237606067657471	232885570526123	23984245300293	240921669006348	233336086273193	0	225781688690186			X	X		X
TVAG_324690;TVAG_110770	Conserved Hypothetical Protein	Activation Of Gtpase Activity	227186660766602	0	227998600006104	219609851837158	222204284667969	222818393707275	0	0	0						X
TVAG_327470;TVAG_013020	Alcohol Dehydrogenase, Putative	Uncharacterized	252171936035156	248440742492676	250954704284668	261558017730713	282572345733643	295451927185059	265830516815186	263967914581299	262892436981201			X	X	X	X
TVAG_331490	Rabx18 Protein, Putative	Vesicle Docking Involved In Exocytosis	248349933624268	250733699798584	248257064819336	256138896942139	249231586456299	251338291168213	0	0	0			X	X			X
TVAG_337230;TVAG_120340	Superoxide Dismutase [Fe], Putative	Superoxide Metabolic Process	254819145202637	253963680267334	257749500274658	262634716033936	271077919006348	279627323150635	238067588806152	242360057830811	241095657348633			X	X
TVAG_346820	Conserved Hypothetical Protein	Endosome Organization	229296913146973	0	225880641937256	234811153411865	230452690124512	234780311584473	0	0	0							X
TVAG_352600;TVAG_352580;TVAG_352560;TVAG_352520	40S Ribosomal Protein S19, Putative	Uncharacterized	248503360748291	247505207061768	241678314208984	258304061889648	248408622741699	250344371795654	0	0	250483913421631			X			X
TVAG_373190	Conserved Hypothetical Protein	Intracellular Protein Transport	245928611755371	232459468841553	245291595458984	241533679962158	234606399536133	235699901580811	0	0	242694931030273			X	X		X	X
TVAG_383350	Rab-2,4	Vesicle Docking Involved In Exocytosis	265688896179199	256591358184814	259131469726563	262931270599365	254525566101074	25866886138916	0	248945808410645	257144756317139		X	X	X			X
TVAG_399430	Conserved Hypothetical Protein	Ion Transport	251137447357178	24529993057251	252368087768555	272150268554688	271288833618164	271139621734619	27438570022583	271773109436035	274455337524414	X						X
TVAG_426320	60S Ribosomal Protein L18, Putative	Translation	234806213378906	22770580291748	233077201843262	226560668945313	0	0	237053546905518	227529926300049	237856636047363				X
TVAG_436700	Beta-Amylase, Putative	Polysaccharide Catabolic Process	259889316558838	260296421051025	0	260328826904297	26713846206665	262735366821289	0	0	254481506347656	X			X			X
TVAG_452440	Conserved Hypothetical Protein	Uncharacterized	223239688873291	0	215803565979004	227096939086914	211944217681885	215728378295898	0	0	0			X				X
TVAG_455310	Peroxiredoxins, Prx-1, Prx-2, Prx-3, Putative	Response To Oxidative Stress	258176555633545	255336513519287	255491905212402	247137145996094	252815704345703	251589241027832	0	0	0				X
TVAG_485570	Synaptotagmin, Putative	Uncharacterized	243506355285645	24814847946167	254160614013672	247836666107178	250837516784668	254665641784668	0	0	0	X			X		X	X
TVAG_493040	Conserved Hypothetical Protein	Uncharacterized	247167530059814	241863136291504	245451583862305	254615459442139	257060127258301	253906402587891	242325706481934	0	238987369537354			X	X
TVAG_508080;TVAG_526230;TVAG_573200;TVAG_552750;TVAG_552740	Acid Phosphatase, Putative	Dephosphorylation	237046146392822	23474817276001	238968906402588	237784633636475	245701637268066	254134159088135	231224994659424	2302272605896	232446842193604	X			X		X
TVAG_003700	Clan Sb, Family S8, Subtilisin-Like Serine Peptidase	Proteolysis	224550552368164	227364063262939	234328804016113	249529151916504	234697341918945	230817222595215	0	0	0	X						X
TVAG_008950	Conserved Hypothetical Protein	Uncharacterized	262511863708496	269682922363281	273333873748779	247609100341797	0	0	0	0	0	X		X				X
TVAG_013010	Family T1, Proteasome Beta Subunit, Threonine Peptidase	Proteasomal Protein Catabolic Process	251026954650879	251407108306885	257771339416504	248832969665527	241450710296631	24646692276001	0	0	250143985748291				X
TVAG_020030	Peptide Chain Release Factor Subunit, Putative	Cytoplasmic Translational Termination	229801368713379	0	221430797576904	217602806091309	0	216268501281738	230669231414795	24198205947876	229040412902832			X	X			X
TVAG_034240	Ctl Transporter, Putative	Transmembrane Transport	244268798828125	243310813903809	249497585296631	252459030151367	261164245605469	249884548187256	260812759399414	261649780273438	259364070892334	X						X
TVAG_037710;TVAG_143230	Copine, Putative	Cellular Response To Calcium Ion	237154445648193	229626293182373	232858791351318	234708518981934	244333896636963	242163791656494	0	0	0							X
TVAG_044240;TVAG_020230	Adaptin, Alpha/Gamma/Epsilon, Putative	Intracellular Protein Transport	235382480621338	0	234681186676025	228875694274902	234036655426025	235108699798584	0	0	244115753173828			X	X
TVAG_049830;TVAG_121610	Disulfide Oxidoreductase, Putative	Uncharacterized	244870777130127	233877182006836	244507961273193	233419094085693	228460369110107	23759693145752	0	0	0			X	X
TVAG_069460	Amp Dependent Ligase, Putative	Long-Chain Fatty Acid Metabolic Process	239455661773682	259045143127441	265796031951904	0	0	0	0	0	229992923736572				X		X	X
TVAG_070500	Rab7G Protein, Putative	Intracellular Protein Transport	25727388381958	0	252930564880371	257037982940674	246686058044434	252991485595703	0	0	249894962310791		X	X	X			X
TVAG_081600	Conserved Hypothetical Protein	Actin Cytoskeleton Organization	240084705352783	0	252621269226074	0	0	0	0	0	0				X			X
TVAG_083250	Conserved Hypothetical Protein	Uncharacterized	235841693878174	235370635986328	235177326202393	0	0	0	0	0	0							X
TVAG_098440;TVAG_098420	Conserved Hypothetical Protein	Dna Metabolic Process	258989906311035	253382759094238	257002563476563	257852649688721	260292434692383	265531520843506	0	0	0	X		X				X
TVAG_105990	Eukaryotic Translation Initiation Factor 3 Subunit,	Translational Initiation	225003547668457	226491508483887	233517818450928	253577995300293	236382102966309	250547389984131	22892765045166	0	0				X
TVAG_119970;TVAG_303050;TVAG_459170	Conserved Hypothetical Protein	Ribosomal Large Subunit Assembly	259944248199463	27548999786377	255400238037109	26770393371582	267134532928467	263183631896973	268254165649414	268177528381348	2766526222229			X	X
TVAG_127250	Family T1, Proteasome Beta Subunit, Threonine Peptidase	Proteasomal Protein Catabolic Process	238932838439941	250441436767578	255595550537109	246257801055908	241560726165771	247938709259033	243770313262939	251545276641846	253873558044434				X		X
TVAG_130270	Serine Palmitoyltransferase, Putative	Biosynthetic Process	24566858291626	256454010009766	255404071807861	0	245488090515137	235660457611084	0	0	0						X	X
TVAG_136510	Conserved Hypothetical Protein	Uncharacterized	233772945404053	235059127807617	241594638824463	2675608253479	260131645202637	261794586181641	0	251042156219482	259289970397949	X					X	X
TVAG_144730	Succinate Thiokinase, Beta Subunit	Tricarboxylic Acid Cycle	243061218261719	243287563323975	24484806060791	0	0	0	0	0	0	X			X		X
TVAG_148890	Conserved Hypothetical Protein	Uncharacterized	246756229400635	244233570098877	241099643707275	243260822296143	241139430999756	24856761932373	0	0	0							X
TVAG_149260	Ras Gtp Exchange Factor, Putative	Small Gtpase Mediated Signal Transduction	233947982788086	226296100616455	239322891235352	229504337310791	240712833404541	236372146606445	0	0	0							X
TVAG_152670	Conserved Hypothetical Protein	Uncharacterized	230179786682129	0	223571357727051	0	0	218256301879883	0	0	0							X
TVAG_161630	Conserved Hypothetical Protein	Intracellular Protein Transport	253598442077637	256541442871094	2545041847229	262232646942139	256449069976807	257643566131592	0	0	0	X		X	X		X	X
TVAG_181000;TVAG_373310	Rab 19, 41 And, Putative	Intracellular Protein Transport	235645351409912	0	232687091827393	237693099975586	23247989654541	234735794067383	0	0	0			X	X			X
TVAG_185900	Conserved Hypothetical Protein	Uncharacterized	25383373260498	251795711517334	252290172576904	259811992645264	25615966796875	252569904327393	0	0	0	X		X				X
TVAG_209020	Phosphoglycerate Mutase, Putative	Glycolytic Process	246981639862061	245498065948486	252915821075439	276178588867188	264213371276855	270000247955322	243751087188721	0	245736351013184		X	X	X
TVAG_211200;TVAG_090060;TVAG_020610	Rabx21 Protein, Putative	Intracellular Protein Transport	234950923919678	229445476531982	234774131774902	23906831741333	234435424804688	237935237884521	0	0	0			X	X			X
TVAG_211910	Conserved Hypothetical Protein	Signal Transduction	235658130645752	0	237969932556152	229441909790039	231931896209717	240402603149414	0	0	0							X
TVAG_212270	F-Actin Capping Protein Subunit Alpha, Putative	Actin Cytoskeleton Organization	245773849487305	240274925231934	250728778839111	254922218322754	257136631011963	266953792572021	0	229984664916992	227692489624023		X	X	X
TVAG_222450	Rabx18 Protein, Putative	Intracellular Protein Transport	27536678314209	270323352813721	274719676971436	284905624389648	273082580566406	283047389984131	26826265335083	270910358428955	268907585144043	X	X	X	X			X
TVAG_222520	Adp-Ribosylation Factor, Arf, Putative	Intracellular Protein Transport	257794151306152	238039054870605	254163837432861	252450675964355	246034278869629	254640731811523	0	240675964355469	243683967590332			X	X			X
TVAG_224040;TVAG_099570	Phosphoserine Aminotransferase, Putative	L-Serine Biosynthetic Process	260491600036621	24657527923584	24767391204834	250115432739258	254194736480713	258661785125732	26861478805542	275558166503906	27427583694458		X	X			X
TVAG_233140	Clan S-, Family S54, Rhomboid-Like Serine Peptidase	Proteolysis	235712642669678	230135726928711	238194828033447	254091815948486	246799755096436	24558708190918	0	0	246087951660156	X						X
TVAG_244120	Gelsolin, Putative	Uncharacterized	240731639862061	248726749420166	265068969726563	270613670349121	259254474639893	263644275665283	239212532043457	0	236897659301758			X	X		X
TVAG_257310	Rab21, Putative	Intracellular Protein Transport	263700771331787	0	263765830993652	26777811050415	258353538513184	261042366027832	25132495880127	0	25410120010376				X			X
TVAG_258380	Glutaminyl-Trna Synthetase, Putative	Translation	241359443664551	222163486480713	235815296173096	242304458618164	242894020080566	239934310913086	0	0	0			X	X
TVAG_259190	Succinate Thiokinase, Beta Subunit	Tricarboxylic Acid Cycle	247923336029053	247814674377441	244790802001953	0	0	0	0	0	0	X			X		X
TVAG_260830	Conserved Hypothetical Protein	Ubiquitin-Dependent Protein Catabolic Process	236821746826172	233147888183594	250732460021973	255253410339355	243135433197021	256143379211426	0	0	0				X		X
TVAG_267300	Family T1, Proteasome Alpha Subunit, Threonine Peptidase	Ubiquitin-Dependent Protein Catabolic Process	253866004943848	260708751678467	264867095947266	256423206329346	251291198730469	258649520874023	252381229400635	255175819396973	259234313964844				X		X
TVAG_268020;TVAG_431780;TVAG_020800	Aspartate Aminotransferase, Putative	Cellular Amino Acid Metabolic Process	234780311584473	23466625213623	24406457901001	262767524719238	253993053436279	266657371520996	258603420257568	250726337432861	260668163299561		X	X	X		X
TVAG_273970	Conserved Hypothetical Protein	Uncharacterized	25244270324707	253406543731689	261418991088867	26565523147583	254014549255371	256272010803223	248787670135498	249250621795654	260227603912354	X	X	X	X			X
TVAG_282180	Clan S-, Family S54, Rhomboid-Like Serine Peptidase	Proteolysis	0	0	245492191314697	265304985046387	260429763793945	264645252227783	265439205169678	258799133300781	265449237823486
TVAG_287570	Conserved Hypothetical Protein	Uncharacterized	236926403045654	241769886016846	240612640380859	262904224395752	254848670959473	251217479705811	0	0	0
TVAG_290960	Family T1, Proteasome Beta Subunit, Threonine Peptidase	Proteasomal Protein Catabolic Process	243461780548096	251806354522705	254706039428711	246082305908203	246212024688721	24734899520874	250501766204834	242050838470459	251792297363281				X		X
TVAG_299380	30S Ribosomal Protein S11, Putative	Ribosomal Small Subunit Assembly	234861583709717	241430473327637	243929004669189	274521484375	24777811050415	255622940063477	0	0	254699211120605
TVAG_300000	Fructose-Bisphosphate Aldolase, Putative	Carbohydrate Metabolic Process	297149276733398	292254085540771	291965732574463	307958316802979	308343200683594	302681865692139	289617118835449	291565341949463	291127948760986		X	X	X
TVAG_311540	Conserved Hypothetical Protein	Small Gtpase Mediated Signal Transduction	23395975112915	0	228163814544678	225232963562012	230780925750732	227834072113037	0	0	0			X				X
TVAG_315190	Camk Family Protein Kinase	Protein Phosphorylation	242283191680908	237368602752686	231351776123047	228722801208496	0	226653995513916	0	0	0				X			X
TVAG_337260	Ran-Binding Protein, Putative	Intracellular Transport	258603420257568	25388801574707	249818096160889	271804447174072	261550884246826	264691753387451	254089870452881	256388454437256	262563800811768			X	X		X	X
TVAG_339760	Protein Phosphatase 2C Delta Isoform, Putative	Protein Dephosphorylation	245267143249512	0	224772644042969	215935916900635	0	214768943786621	0	0	0							X
TVAG_340570	Conserved Hypothetical Protein	Uncharacterized	241756191253662	253303985595703	252400531768799	0	0	0	0	0	0	X	X	X	X
TVAG_350580;TVAG_207300	Rab21, Putative	Vesicle Docking Involved In Exocytosis	254649753570557	256652755737305	252877826690674	259093742370605	256045875549316	254801597595215	246949272155762	248286151885986	250840759277344		X	X	X		X	X
TVAG_351390	Conserved Hypothetical Protein	Activation Of Gtpase Activity	223039627075195	0	223801250457764	0	0	209667701721191	0	0	0
TVAG_364620	Phosphofructokinase, Putative	Fructose 6-Phosphate Metabolic Process	255487499237061	264690036773682	267055644989014	279476528167725	277976112365723	284791965484619	255129795074463	256265602111816	256635398864746			X	X		X
TVAG_369020;TVAG_558650;TVAG_516070	Clathrin Heavy Chain, Putative	Intracellular Protein Transport	252692089080811	24211633682251	248095092773438	236379890441895	240921669006348	238480453491211	244439849853516	0	0	X		X	X		X
TVAG_487470;TVAG_370550	40S Ribosomal Protein S6, Putative	Uncharacterized	254938716888428	252120418548584	238489055633545	257341232299805	244315414428711	250638580322266	0	0	253207912445068						X
TVAG_371710	Conserved Hypothetical Protein	Uncharacterized	246317863464355	238037071228027	246008224487305	0	242596874237061	245372409820557	243690624237061	244013900756836	245524482727051			X				X
TVAG_383940	Phosphoglycerate Kinase, Putative	Gluconeogenesis	26924222946167	261803684234619	263865661621094	266551265716553	275212574005127	267030582427979	0	262882061004639	0	X	X	X	X		X
TVAG_385340	Clan Cd, Family C13, Legumain-Like Cysteine Peptidase	Proteolysis	262335586547852	248038063049316	261950912475586	249174785614014	238343181610107	255863189697266	239379558563232	257313289642334	256398391723633			X	X		X	X
TVAG_390750	Rab-18, Putative	Intracellular Protein Transport	237548084259033	233134059906006	236172847747803	232899646759033	231057357788086	235130405426025	0	0	0			X				X
TVAG_411090	Protein Tola, Putative	Uncharacterized	271146583557129	262425441741943	280862846374512	306683082580566	284572467803955	300298633575439	265258178710938	269024219512939	275388240814209			X	X		X	X
TVAG_412640	Conserved Hypothetical Protein	Uncharacterized	241337509155273	0	241014938354492	246356105804443	0	243088302612305	0	0	0	X		X				X
TVAG_439460	Ap-2 Complex Subunit Beta-1, Putative	Intracellular Protein Transport	253265972137451	243124370574951	244596405029297	240700550079346	234074325561523	250693187713623	0	0	0			X			X
TVAG_450640	Conserved Hypothetical Protein	Uncharacterized	0	257874584197998	260819454193115	261628475189209	251063747406006	245198936462402	0	0	0							X
TVAG_457060	Disheveled Associated Activator Of Morphogenesis, Puta	Actin Cytoskeleton Organization	242527751922607	213235015869141	229221782684326	227564182281494	22205114364624	219934482574463	0	0	0			X	X			X
TVAG_466460	Conserved Hypothetical Protein	Cell Morphogenesis	226785907745361	222446689605713	219096908569336	245077285766602	226662883758545	236411895751953	0	0	0							X
TVAG_470120	Protein Tola, Putative	Uncharacterized	0	0	248666973114014	285504302978516	244742603302002	261036357879639	0	0	0		X	X	X			X
TVAG_476160	Clan Mg, Familly M24, Aminopeptidase P-Like Metallop	Proteolysis	254409790039063	252418003082275	26546293258667	263399925231934	270540332794189	263285846710205	0	0	237299308776855				X
TVAG_480960	Copine, Putative	Cellular Response To Calcium Ion	0	0	228768577575684	2337451171875	233937511444092	235994606018066	0	0	0							X
TVAG_485880	Clan Ca, Family C1, Cathepsin L-Like Cysteine Peptidase	Proteolysis	250304851531982	254436378479004	256495742797852	254235172271729	259174327850342	25684476852417	0	0	240409297943115				X		X	X
TVAG_009830	Clan Sc, Family S28, Unassigned Serine Peptidase	Proteolysis	245929756164551	251877498626709	249460124969482	26083122253418	262209968566895	25562557220459	0	0	0				X		X	X
TVAG_018930;TVAG_473410	Heat Shock Protein, Putative	Ubiquitin-Dependent Erad Pathway	240275764465332	252332668304443	245040950775146	0	0	0	0	0	0				X		X	X
TVAG_487930;TVAG_487360;TVAG_419040;TVAG_341090;TVAG_184530;TVAG_065040;TVAG_020480	40S Ribosomal Protein S18, Putative	Uncharacterized	251887683868408	0	244933223724365	265070476531982	250634460449219	257632694244385	0	0	254362850189209			X			X
TVAG_032160	Conserved Hypothetical Protein	Intracellular Protein Transport	240380001068115	229318561553955	2400710105896	255678443908691	24907657623291	252077674865723	0	0	0	X			X			X
TVAG_389320;TVAG_237220;TVAG_078160;TVAG_038050	60S Ribosomal Protein L26, Putative	Uncharacterized	24446195602417	245642433166504	0	263484077453613	254136753082275	257571258544922	238375930786133	0	237087249755859
TVAG_039260	Conserved Hypothetical Protein	Erad Pathway	227694511413574	0	0	244685535430908	227400779724121	233942756652832	0	0	0							X
TVAG_347960;TVAG_335820;TVAG_333200;TVAG_302160;TVAG_277940;TVAG_242190;TVAG_164600;TVAG_061920;TVAG_040120	40S Ribosomal Protein S26, Putative	Uncharacterized	25003116607666	257040348052979	246782569885254	256401691436768	248454151153564	254729290008545	261024742126465	262571716308594	26532299041748			X
TVAG_041990	Conserved Hypothetical Protein	Uncharacterized	237715282440186	239805030822754	2457004737854	271945095062256	265998859405518	259205932617188	250328826904297	251501941680908	254942684173584			X	X		X	X
TVAG_043470	Rna-Binding Protein, Putative	Uncharacterized	259044914245605	260359058380127	268457736968994	272305011749268	259616622924805	255217819213867	248848342895508	0	251080112457275				X		X
TVAG_044270	Rab, Putative	Intracellular Protein Transport	235617408752441	228600521087646	236035404205322	2401784324646	237724342346191	245938301086426	0	0	0		X	X				X
TVAG_047460	40S Ribosomal Protein S3A, Putative	Translation	248159713745117	248904113769531	245379524230957	24067268371582	0	0	0	0	0				X
TVAG_065320	Rab21, Putative	Intracellular Protein Transport	246429538726807	0	241156101226807	246361083984375	241221828460693	247910404205322	0	0	238992900848389			X				X
TVAG_080000;TVAG_175670	Beta-Amylase, Putative	Polysaccharide Catabolic Process	238792343139648	236316757202148	240962753295898	25237283706665	260805435180664	250020008087158	0	0	240834274291992	X			X
TVAG_081630	Purine Nucleoside Phosphorylase, Putative	Uridine Catabolic Process	238956890106201	240060749053955	247901954650879	252718467712402	262126541137695	256351127624512	242015743255615	248425884246826	233357906341553		X	X	X		X
TVAG_094060	F-Actin Capping Protein Beta Subunit, Putative	Cell Morphogenesis	24973819732666	0	241829090118408	250461025238037	245930328369141	258754425048828	0	0	0		X		X
TVAG_099490	Glucose Kinase, Putative	Negative Regulation Of Dna-Templated Transcription	227371501922607	226739635467529	23269136428833	208972606658936	0	218750782012939	0	0	0				X
TVAG_102670	Conserved Hypothetical Protein	Uncharacterized	231424560546875	0	221516513824463	0	0	230768375396729	0	0	0				X			X
TVAG_108330	Conserved Hypothetical Protein	Nucleic Acid Phosphodiester Bond Hydrolysis	259255142211914	0	0	253681964874268	0	253980655670166	0	0	0	X						X
TVAG_110660	Beta-Hexosaminidase, Putative	Carbohydrate Metabolic Process	243564910888672	239302158355713	245340366363525	255687732696533	252334480285645	255137634277344	0	0	0	X			X			X
TVAG_113710	Phosphoglycerate Mutase, Putative	Glycolytic Process	264325771331787	0	268212852478027	286732711791992	282677631378174	284020233154297	263208255767822	268215293884277	26847448348999		X	X	X		X
TVAG_117320	Conserved Hypothetical Protein	Uncharacterized	248188991546631	238199710845947	239317493438721	255379219055176	251980171203613	248862762451172	0	0	0				X		X	X
TVAG_454860;TVAG_371330;TVAG_329340;TVAG_120180	40S Ribosomal Protein S10, Putative	Uncharacterized	266757297515869	272404537200928	260842590332031	254933528900146	249023303985596	24826192855835	264624347686768	264359340667725	273315086364746				X		X
TVAG_433430;TVAG_120630	Adp-Ribosylation Factor, Arf, Putative	Cilium Assembly	231181793212891	0	224415683746338	235644187927246	236526126861572	234547538757324	0	0	0			X	X			X
TVAG_190130;TVAG_140190;TVAG_121380	60S Ribosomal Protein L22, Putative	Uncharacterized	263897857666016	263669147491455	26855073928833	265730857849121	266128768920898	2662282371521	0	0	0			X			X
TVAG_401890;TVAG_346410;TVAG_300490;TVAG_143790;TVAG_121550;TVAG_199230	60S Ribosomal Protein L27A, Putative	Uncharacterized	239430637359619	24497896194458	0	252314357757568	241370391845703	241741714477539	0	0	247590312957764			X
TVAG_125070	Conserved Hypothetical Protein	Dna Metabolic Process	24830696105957	253100109100342	255949993133545	242932662963867	240439357757568	243970851898193	0	0	232889804840088							X
TVAG_125960	Conserved Hypothetical Protein	Uncharacterized	246320629119873	251326923370361	255327892303467	0	250036315917969	242360057830811	274936580657959	276538982391357	272898235321045
TVAG_126360	Conserved Hypothetical Protein	Uncharacterized	233017330169678	0	242929153442383	24915018081665	254582328796387	250968379974365	0	0	0
TVAG_127180	Purine Nucleoside Phosphorylase, Putative	Nucleobase-Containing Compound Metabolic Process	244197616577148	239589004516602	24771427154541	23966136932373	256227684020996	275620899200439	0	0	24533145904541			X	X		X
TVAG_127290	Conserved Hypothetical Protein	Ion Transport	232461776733398	0	247964973449707	264468269348145	255526237487793	254331035614014	0	0	0	X						X
TVAG_133500	Conserved Hypothetical Protein	Uncharacterized	239372386932373	25371789932251	251723022460938	274365863800049	257370929718018	251606941223145	257711505889893	260163135528564	259335289001465	X		X	X			X
TVAG_139240	Subgroup Iiii Aminotransferase, Putative	Cellular Amino Acid Biosynthetic Process	234628868103027	231012210845947	230126361846924	251610794067383	255816440582275	255092086791992	0	220576171875	226809101104736			X	X		X
TVAG_139450	Involucrin, Putative	Uncharacterized	0	231660842895508	25191707611084	266217060089111	25915771484375	26838939666748	0	0	0	X			X			X
TVAG_144720	Retinal Rod Rhodopsin-Sensitive Cgm	Uncharacterized	0	0	235375366210938	241133079528809	238995666503906	244076900482178	0	0	0				X
TVAG_150430	Conserved Hypothetical Protein	Glycogen Catabolic Process	228207302093506	231604804992676	233318328857422	0	0	211533832550049	0	217541351318359	229148273468018				X
TVAG_156640	Aspartyl/Lysyl-Trna Synthetase, Putative	Trna Aminoacylation For Protein Translation	242962818145752	0	238474712371826	2321142578125	0	227646007537842	0	0	0				X
TVAG_158990	Heterogeneous Nuclear Ribonucleoprotein A/B, Putative	Mrna Splicing, Via Spliceosome	252779579162598	253524551391602	261851425170898	281230220794678	266541709899902	267661037445068	0	0	240829410552979			X	X		X
TVAG_160580	Synaptotagmin 1, 3, C.Elegans, Putative	Uncharacterized	240920848846436	242123031616211	248837623596191	261692657470703	265575847625732	258272838592529	236599235534668	0	233102188110352			X				X
TVAG_163000	Heat Shock Protein, Putative	Cellular Response To Unfolded Protein	257955570220947	265094203948975	266180686950684	274736709594727	266097812652588	267785625457764	25318000793457	0	250292205810547		X	X	X
TVAG_172200	Conserved Hypothetical Protein	Uncharacterized	229472618103027	216844882965088	222097015380859	221614017486572	228014392852783	221640453338623	228288288116455	0	0				X
TVAG_183300	Aminotransferase Class V, Putative	L-Serine Biosynthetic Process	238870677947998	233374252319336	233393287658691	231449165344238	0	241866912841797	242098503112793	0	240627460479736		X	X	X
TVAG_185360	Conserved Hypothetical Protein	Uncharacterized	229522132873535	0	23607723236084	227914581298828	0	223807334899902	0	0	0					X		X
TVAG_190360	Conserved Hypothetical Protein	Uncharacterized	226189651489258	0	232955799102783	0	0	0	0	0	0							X
TVAG_202090	Clan Ca, Family C1, Cathepsin L-Like Cysteine Peptidase	Proteolysis	257143173217773	264088897705078	26606819152832	26175085067749	260949459075928	26231014251709	0	0	0				X			X
TVAG_205590	Arp2/3 Complex 21 Kd Subunit, Putative	Regulation Of Actin Filament Polymerization	0	0	0	218143291473389	0	23107349395752	0	0	0				X
TVAG_208990	Conserved Hypothetical Protein	Sequestering Of Actin Monomers	235146064758301	0	229854278564453	242329368591309	245256996154785	249284992218018	240783042907715	0	238072509765625		X	X	X			X
TVAG_212570	Conserved Hypothetical Protein	Uncharacterized	0	0	259216842651367	26261157989502	0	246282863616943	260442066192627	266943168640137	254871387481689	X		X	X			X
TVAG_213390	Conserved Hypothetical Protein	Uncharacterized	232763977050781	245509815216064	24565580368042	235387210845947	232979602813721	233001976013184	237830677032471	0	224403514862061				X		X
TVAG_226350	Clathrin Coat Assembly Protein Ap-1, Putative	Intracellular Protein Transport	248327255249023	0	24468864440918	245103874206543	244595775604248	256006240844727	0	0	0			X	X		X
TVAG_237680	Adp,Atp Carrier Protein, Putative	Transmembrane Transport	240354022979736	0	242550830841064	0	0	0	0	0	0	X			X			X
TVAG_240680	Leucine-Rich Repeat Protein, Bspa Family	Uncharacterized	25668363571167	264060859680176	263631916046143	265643463134766	261945457458496	263861560821533	0	0	0	X	X	X			X	X
TVAG_245240	Conserved Hypothetical Protein	Uncharacterized	241897869110107	240843200683594	239675445556641	0	0	0	0	0	0							X
TVAG_251250	Conserved Hypothetical Protein	Uncharacterized	238797950744629	0	245761756896973	238924503326416	245206127166748	242662086486816	0	0	0			X	X			X
TVAG_256150	Conserved Hypothetical Protein	Uncharacterized	229837417602539	0	226408367156982	230853900909424	23395845413208	233590412139893	0	0	0				X		X
TVAG_265400;TVAG_215200;TVAG_228250;TVAG_014090;TVAG_303030;TVAG_280780;TVAG_181920;TVAG_181010;TVAG_278290;TVAG_093960;TVAG_167500;TVAG_174680;TVAG_491270;TVAG_032900;TVAG_182560;TVAG_481990;TVAG_473310;TVAG_172590;TVAG_276210	Bsu-Protein Phosphatase, Putative	Uncharacterized	238553829193115	241954288482666	236842098236084	239256057739258	237899475097656	239451198577881	0	0	239566860198975				X
TVAG_267320	Nicastrin Precursor, Putative	Protein Processing	252305202484131	243267688751221	246758918762207	24577615737915	243612518310547	244268169403076	0	0	0	X						X
TVAG_272360	Rho4, Putative	Actin Filament Organization	28583158493042	266802978515625	271274089813232	275077877044678	268658485412598	274239826202393	0	0	0	X	X	X	X			X
TVAG_361780;TVAG_283020	Initiation Factor 5A, Putative	Translation	256743030548096	0	250180130004883	272400894165039	266778812408447	263653793334961	0	252481117248535	0			X	X		X
TVAG_299450	Alanyl-Trna Synthetase, Putative	Trna Modification	241821517944336	219088115692139	232050552368164	236760520935059	229374885559082	233417739868164	236884841918945	23764965057373	224736785888672				X
TVAG_300910	Rabx18 Protein, Putative	Intracellular Protein Transport	0	231139278411865	232502326965332	233104953765869	233186550140381	237643566131592	0	0	0			X	X		X	X
TVAG_306690	Tkl Family Protein Kinase	Protein Phosphorylation	214789695739746	0	212091369628906	0	0	0	0	0	0							X
TVAG_308170	Conserved Hypothetical Protein	Uncharacterized	228412837982178	0	232434921264648	234528713226318	225230331420898	227033061981201	0	0	237605056762695				X
TVAG_315150	Conserved Hypothetical Protein	Autophagy	238101959228516	0	239177055358887	0	225459957122803	234798812866211	0	0	0
TVAG_321430	Clan Mg, Familly M24, Aminopeptidase P-Like Metallop	Uncharacterized	225288619995117	213173866271973	231049995422363	255039730072021	252565956115723	258500270843506	0	0	218922653198242				X
TVAG_335250	Conserved Hypothetical Protein	Uncharacterized	269598064422607	267239036560059	27289119720459	282768859863281	271417045593262	261543922424316	0	0	0	X
TVAG_342360	Vacuolar Protein Sorting Vps16, Putative	Intracellular Protein Transport	0	230011672973633	231509380340576	220722160339355	0	21874439239502	0	0	0							X
TVAG_347770;TVAG_487200;TVAG_221700;TVAG_174740	Dolichol-Phosphate Mannosyltransferase, Putative	Protein Glycosylation	237653694152832	249203433990479	250451431274414	0	0	0	0	0	22876558303833						X	X
TVAG_349870	Rabx15 Protein, Putative	Intracellular Protein Transport	241192569732666	239237022399902	240945835113525	243256702423096	237403659820557	239236125946045	0	0	234326248168945			X	X			X
TVAG_353280	40S Ribosomal Protein S19, Putative	Ribosomal Small Subunit Assembly	239526042938232	245690040588379	0	0	0	0	0	0	0				X
TVAG_353290	Conserved Hypothetical Protein	Uncharacterized	238789539337158	245245037078857	245710315704346	247601490020752	249136047363281	242282466888428	253991088867188	248726749420166	241086883544922				X
TVAG_360810	Vacuolar Atp Synthase Subunit E, Putative	Ion Transport	261247291564941	246416301727295	261894645690918	277808170318604	267716541290283	269034576416016	253405857086182	0	0			X	X		X	X
TVAG_365870	Conserved Hypothetical Protein	Uncharacterized	213745384216309	0	221870994567871	256300640106201	244679946899414	243458385467529	227216320037842	0	230566082000732		X	X	X			X
TVAG_388670	26S Proteasome Subunit S9, Putative	Ubiquitin-Dependent Protein Catabolic Process	226308765411377	0	223705806732178	0	0	215506992340088	232171192169189	231425971984863	224837741851807				X		X
TVAG_390980	Clan Ma, Family M8, Leishmanolysin-Like Metallopeptidase	Proteolysis	221299057006836	231342220306396	234323711395264	259548244476318	254701061248779	2581711769104	0	0	228198928833008	X			X			X
TVAG_394060	Conserved Hypothetical Protein	Small Gtpase Mediated Signal Transduction	228200302124023	0	224264965057373	224505577087402	2216796875	220522518157959	0	0	0			X				X
TVAG_396070	Charged Multivesicular Body Protein, Putative	Vesicle Budding From Membrane	0	0	235806083679199	272695465087891	257487316131592	250991268157959	0	0	244140300750732		X		X			X
TVAG_396200	Neuroendocrine Differentiation Factor, Putative	Vacuolar Transport	240332183837891	238635349273682	238574733734131	261048164367676	257817935943604	253910655975342	0	24645263671875	239750881195068		X	X	X			X
TVAG_398430	Conserved Hypothetical Protein	Uncharacterized	249200267791748	249191627502441	256098937988281	242041149139404	250543231964111	244112510681152	0	0	0		X	X	X		X	X
TVAG_402260	Coactosin, Putative	Regulation Of Actin Filament Polymerization	250225067138672	257825183868408	265761451721191	252281360626221	270507164001465	267324676513672	259573497772217	259592304229736	257972145080566			X	X
TVAG_403340	Soluble Nsf Attacment Protein, Putative	Intracellular Protein Transport	230041370391846	230913753509521	234860343933105	239085731506348	238906898498535	246379337310791	0	0	0							X
TVAG_405240	Adenosylhomocysteinase, Putative	One-Carbon Metabolic Process	248105888366699	254289569854736	26252197265625	251221446990967	250861434936523	272337055206299	0	0	0		X	X	X
TVAG_410220	Clan Mg, Familly M24, Aminopeptidase P-Like Metallop	Proteolysis	226126136779785	229027900695801	237616214752197	246498203277588	243507022857666	240850505828857	0	0	0				X			X
TVAG_410350	Conserved Hypothetical Protein	Uncharacterized	271719779968262	272010688781738	276443023681641	247276477813721	243269062042236	262408351898193	0	0	0				X		X
TVAG_499760;TVAG_411440	60S Acidic Ribosomal Protein P2, Putative	Cytoplasmic Translational Elongation	0	250463523864746	254999351501465	241756191253662	23215934753418	233508377075195	0	0	0				X		X
TVAG_417600	Conserved Hypothetical Protein	Uncharacterized	245513343811035	249999389648438	252377586364746	278157386779785	275713787078857	280155792236328	0	0	0
TVAG_420420;TVAG_302880	Dj-1 Protein, Putative	Glyoxal Metabolic Process	253173789978027	250055599212646	259983043670654	27109188079834	2714870262146	275523014068604	256120052337646	0	0			X	X		X	X
TVAG_422780	Alcohol Dehydrogenase, Putative	Uncharacterized	258543853759766	249221611022949	265042152404785	276510944366455	271493816375732	277118129730225	239561538696289	0	0		X	X	X
TVAG_427450	Conserved Hypothetical Protein	Uncharacterized	0	0	214351711273193	241949043273926	248073482513428	232310028076172	0	0	0							X
TVAG_431140	Conserved Hypothetical Protein	Uncharacterized	234275188446045	225304584503174	230028686523438	213821067810059	0	224642105102539	0	0	0			X				X
TVAG_436840	Dynamin, Putative	Uncharacterized	241620025634766	235955963134766	233417739868164	243778247833252	234300746917725	24489652633667	0	0	0			X	X		X	X
TVAG_437390	Hypothetical Protein	Uncharacterized	23477783203125	0	239456558227539	205059127807617	0	202099094390869	0	0	0				X
TVAG_455100	Heat Shock Protein 70Kd, Putative	Cellular Response To Unfolded Protein	242669239044189	24759183883667	233264942169189	0	0	0	0	0	0				X		X
TVAG_456510	Conserved Hypothetical Protein	Nucleoside Diphosphate Catabolic Process	245394897460938	233944053649902	237758541107178	239441375732422	238301639556885	231560878753662	0	0	0	X						X
TVAG_457850	Teneurin And N-Acetylgl	Cell Communication	230468349456787	244468269348145	253187236785889	243553485870361	252467365264893	240106048583984	0	0	0	X		X	X			X
TVAG_464740	Ras, Putative	Vesicle Docking Involved In Exocytosis	231899223327637	228696479797363	232037563323975	257592601776123	246105422973633	25065954208374	0	0	238018341064453			X				X
TVAG_477050	Vamp-7, Putative	Uncharacterized	227553577423096	0	228184299468994	237468357086182	231790103912354	231786918640137	0	0	0	X						X
TVAG_477530	26S Protease Regulatory Subunit S10B, Putative	Protein Catabolic Process	0	0	222403087615967	225411109924316	22540922164917	233300552368164	0	0	0				X
TVAG_481370	Amp Dependent Ligase/Synthetase, Putative	Long-Chain Fatty Acid Metabolic Process	23272985458374	259735774993896	267945156097412	0	0	0	0	0	246217060089111						X	X
TVAG_493290	Phosphomethylpyrimidine Kinase, Putative	Pyridoxal 5'-Phosphate Salvage	240634880065918	231358661651611	236293430328369	223540172576904	233936214447021	234023666381836	245839977264404	24632007598877	250484313964844				X
TVAG_542460;TVAG_109910	Multidrug Resistance Protein 1, 2, Putative	Transmembrane Transport	23911958694458	237813682556152	238348960876465	229920997619629	233060512542725	232773914337158	0	0	0							X
TVAG_544880;TVAG_RG_DS130478_1	Conserved Hypothetical Protein	Uncharacterized	251669120788574	262750835418701	260260581970215	279334831237793	261717681884766	261602325439453	26588493347168	267793140411377	267020015716553	X		X	X			X
TVAG_004500	Calmodulin-2, Putative	Uncharacterized	0	0	226788272857666	242872905731201	237683010101318	241906909942627	0	0	0			X				X
TVAG_008850	Conserved Hypothetical Protein	Intracellular Protein Transport	0	235458068847656	244433536529541	240714473724365	250546550750732	243989791870117	0	0	0			X	X
TVAG_008880	Clan Ma, Family M1, Aminopeptidase N-Like Metallopepti	Proteolysis	240104351043701	0	236772365570068	250689907073975	241527500152588	244279670715332	0	0	0				X
TVAG_463440;TVAG_347820;TVAG_013870	60S Ribosomal Protein L35, Putative	Maturation Of Lsu-Rrna From Tricistronic Rrna Transcript	230372295379639	0	235780773162842	255374774932861	252920036315918	251335544586182	0	0	230860538482666			X	X		X
TVAG_018020	Lipopolysaccharide Biosynthesis Protein Rfbh, Putative	Polysaccharide Biosynthetic Process	234456901550293	224530467987061	229350986480713	237676944732666	23634557723999	244908771514893	0	0	227240905761719				X
TVAG_022230;TVAG_076500	Udp-Glucose Glycoprotein:Glucosyltransferase, Putative	Protein Glycosylation	218146018981934	246067638397217	250418071746826	0	0	0	0	0	0						X	X
TVAG_026360	Gtpase_Rho, Putative	Small Gtpase Mediated Signal Transduction	242737674713135	23383768081665	240077857971191	235574226379395	23306468963623	239270534515381	0	241439819335938	236361083984375			X				X
TVAG_028010	Dynamin, Putative	Uncharacterized	22909086227417	0	0	223388118743896	0	229472808837891	0	0	0				X			X
TVAG_034760	Conserved Hypothetical Protein	Uncharacterized	235349273681641	0	233512420654297	236630783081055	235645351409912	229108619689941	0	0	0							X
TVAG_035410	Translation Initiation Inhibitor, Putative	Organonitrogen Compound Catabolic Process	242079162597656	241808624267578	242672805786133	255099029541016	260233535766602	26440092086792	0	24794713973999	242766819000244		X	X	X		X
TVAG_039050	Nad Dependent Epimerase/Dehydratase, Putative	Uncharacterized	236337833404541	0	0	241081314086914	0	239714088439941	0	0	246842632293701				X
TVAG_041600	Cystathionine Beta-Lyase, Putative	Transsulfuration	245096015930176	239800662994385	243935546875	238792343139648	24893238067627	246860294342041	0	0	0			X	X
TVAG_327180;TVAG_272950;TVAG_272940;TVAG_266850;TVAG_057380;TVAG_050990;TVAG_443060	Ribosomal Protein S28, Putative	Uncharacterized	0	0	227583103179932	268854160308838	248271141052246	250278301239014	0	0	0
TVAG_055600;TVAG_241920;TVAG_501170;TVAG_241910	Conserved Hypothetical Protein	Small Gtpase Mediated Signal Transduction	225285034179688	0	22573392868042	245999145507813	225346908569336	23764965057373	0	0	0						X	X
TVAG_060160	Conserved Hypothetical Protein	Uncharacterized	246516284942627	250095386505127	253831100463867	0	0	0	0	0	0				X			X
TVAG_067440	Conserved Hypothetical Protein	Protein Transport	0	0	23221019744873	255566921234131	243464488983154	244656295776367	0	0	0		X		X			X
TVAG_074610;TVAG_407240	60S Ribosomal Protein L10, Putative	Ribosomal Large Subunit Assembly	236311206817627	246682815551758	0	0	227352714538574	0	0	0	0	X
TVAG_076170	26S Proteasome Regulatory Subunit S3, Putative	Ubiquitin-Dependent Protein Catabolic Process	234155769348145	235282649993896	233013134002686	238259983062744	231180381774902	233089694976807	0	0	231241092681885				X		X
TVAG_083290	Arp2/3 Complex 21 Kd Subunit, Putative	Regulation Of Actin Filament Polymerization	0	0	242364444732666	228258228302002	0	238146018981934	0	0	0				X
TVAG_482300;TVAG_178600;TVAG_110530;TVAG_086300	30S Ribosomal Protein S10P, Putative	Uncharacterized	0	0	222798862457275	24459264755249	232502174377441	239155197143555	0	0	0						X
TVAG_096380	Conserved Hypothetical Protein	Cell Morphogenesis	235091781616211	0	22813663482666	237706203460693	22935188293457	240041027069092	0	0	0							X
TVAG_099990;TVAG_448420;TVAG_100000	Vacuolar Atp Synthase Subunit E, Putative	Ion Transport	229470653533936	0	0	252614459991455	2396022605896	244513626098633	0	0	0				X			X
TVAG_101260	Rab32, Putative	Intracellular Protein Transport	23475435256958	0	233396015167236	241747798919678	236977405548096	241572284698486	0	0	0							X
TVAG_420160;TVAG_101770;TVAG_531550;TVAG_263020	Conserved Hypothetical Protein	Uncharacterized	0	247209854125977	0	0	228471088409424	23306468963623	251078109741211	254534664154053	237303447723389
TVAG_104520	Conserved Hypothetical Protein	Uncharacterized	230070323944092	231999130249023	231652717590332	0	0	0	0	0	0							X
TVAG_106540	Conserved Hypothetical Protein	Uncharacterized	212571277618408	0	214647331237793	242527027130127	209711284637451	211174983978271	0	0	0							X
TVAG_108190	Conserved Hypothetical Protein	Signal Transduction	224166355133057	0	243915901184082	0	23042366027832	22649019241333	0	0	0
TVAG_114830	Conserved Hypothetical Protein	Transmembrane Transport	238144073486328	242715606689453	237466316223145	224978485107422	232133255004883	214567356109619	0	0	0							X
TVAG_117900	Synaptotagmin, Putative	Uncharacterized	259972476959229	269675216674805	271553764343262	262505722045898	256069889068604	256574726104736	0	0	0				X			X
TVAG_119180	Conserved Hypothetical Protein	Uncharacterized	23216438293457	218396892547607	22915319442749	249955024719238	239855480194092	256046733856201	0	0	0			X	X			X
TVAG_123850	Conserved Hypothetical Protein	Uncharacterized	25816873550415	272885055541992	267494468688965	0	0	239494018554688	0	0	254461002349854				X		X	X
TVAG_125360	Disulfide Oxidoreductase, Putative	Removal Of Superoxide Radicals	24956729888916	245064563751221	244222679138184	248485221862793	243214797973633	24630952835083	0	0	0			X	X
TVAG_128250;TVAG_135700	26S Protease Regulatory Subunit S10B, Putative	Protein Catabolic Process	239377765655518	243452987670898	239879779815674	0	0	0	0	0	242384147644043				X
TVAG_134230	Conserved Hypothetical Protein	Uncharacterized	245603427886963	251506595611572	253149280548096	225596656799316	0	235361137390137	0	0	0	X		X
TVAG_420370;TVAG_312170;TVAG_134920	Dynein Light Chain, Putative	Uncharacterized	259340915679932	259582576751709	260622119903564	251899738311768	255207328796387	261421527862549	254624824523926	258374729156494	251404762268066			X			X
TVAG_137010	Conserved Hypothetical Protein	Uncharacterized	225458316802979	210909385681152	254014873504639	0	0	0	0	0	0	X			X	X
TVAG_139300;TVAG_213710;TVAG_434120	Phosphoenolpyruvate Carboxykinase, Putative	Gluconeogenesis	272244415283203	269497127532959	271427745819092	26489652633667	262894020080566	273293724060059	265890655517578	266219863891602	258450794219971	X	X	X	X		X
TVAG_375490;TVAG_143030	40S Ribosomal Protein S7, Putative	Uncharacterized	233585033416748	226122074127197	229287700653076	246672534942627	244600143432617	238301639556885	235102653503418	234294357299805	233971519470215						X
TVAG_145440	Thioredoxin, Putative	Uncharacterized	242033672332764	230790214538574	234128665924072	249922637939453	240100078582764	245506286621094	0	0	0			X	X		X	X
TVAG_163360;TVAG_163330	Hypothetical Protein	Uncharacterized	254033737182617	256391201019287	260451240539551	0	0	0	0	0	0
TVAG_163900	Conserved Hypothetical Protein	Ribosomal Large Subunit Assembly	0	24718843460083	229163761138916	241553764343262	24159387588501	23764965057373	239655208587646	0	244176387786865				X
TVAG_175760	Conserved Hypothetical Protein	Uncharacterized	255834808349609	249695663452148	248487129211426	254750328063965	256671447753906	250733699798584	0	258726272583008	0			X			X	X
TVAG_176220	Rabb And C, Putative	Uncharacterized	0	239865913391113	241319465637207	238102931976318	233247108459473	234296913146973	0	0	0				X
TVAG_180840	Conserved Hypothetical Protein	Uncharacterized	262345447540283	246273956298828	253600788116455	249771423339844	250842380523682	255978984832764	24045934677124	252296409606934	248319530487061	X	X	X	X		X
TVAG_182700	Conserved Hypothetical Protein	Methylation	22908390045166	229436550140381	235396690368652	227096500396729	23821626663208	232278938293457	0	0	0				X		X
TVAG_193620	Conserved Hypothetical Protein	Uncharacterized	0	0	242227306365967	241397743225098	236729278564453	235416774749756	0	0	0				X			X
TVAG_205640	Conserved Hypothetical Protein	Uncharacterized	221802253723145	0	219369678497314	236231021881104	228772506713867	222342376708984	0	0	0				X
TVAG_208760	Conserved Hypothetical Protein	Uncharacterized	231879749298096	0	233134059906006	0	0	0	0	0	0
TVAG_212020	Transketolase, Putative	Pentose-Phosphate Shunt	254134483337402	236055774688721	24559642791748	254993572235107	261914806365967	271565341949463	235252799987793	226492385864258	219096908569336	X		X	X
TVAG_212110	Dynein Light Chain Tctex-Type, Putative	Microtubule-Based Movement	256026363372803	245110511779785	248684425354004	250262699127197	249570846557617	254199542999268	0	0	0
TVAG_216890	Vacuolar Sorting Protein, Putative	Intracellular Protein Transport	232652778625488	216927261352539	242461204528809	246914176940918	235433311462402	236599235534668	22640417098999	218624572753906	226274948120117			X	X
TVAG_222460	Sphingomyelin Phosphodiesterase, Putative	Uncharacterized	231445426940918	0	230109634399414	0	240592842102051	23909854888916	0	0	0							X
TVAG_224190	Conserved Hypothetical Protein	Uncharacterized	0	0	0	0	282522792816162	277553176879883	0	0	27361686706543	X
TVAG_226310	Conserved Hypothetical Protein	Uncharacterized	253166542053223	275750637054443	26908275604248	0	0	0	0	0	255735187530518							X
TVAG_233330	Conserved Hypothetical Protein	Ribosome Biogenesis	235228881835938	221291828155518	229850273132324	240422649383545	236683902740479	231611881256104	230968532562256	0	0				X			X
TVAG_241160	Malic Enzyme, Putative	Uncharacterized	233963680267334	0	230284881591797	0	0	226512565612793	0	0	0				X
TVAG_243310	Conserved Hypothetical Protein	Uncharacterized	235231285095215	247611637115479	243264942169189	0	0	0	0	0	0							X
TVAG_245190;TVAG_048690;TVAG_044820;TVAG_602270;TVAG_562150;TVAG_090550;TVAG_312310	Aldo-Keto Reductase, Putative	Uncharacterized	226660499572754	0	23261266708374	259595184326172	240212364196777	258786735534668	0	0	0				X
TVAG_263350	Conserved Hypothetical Protein	Uncharacterized	220594329833984	227008743286133	231839694976807	0	0	0	0	0	0							X
TVAG_265540	Conserved Hypothetical Protein	Uncharacterized	232318820953369	0	236520652770996	250928516387939	249898414611816	24951358795166	0	0	0				X		X	X
TVAG_267830	Agc Family Protein Kinase	Protein Phosphorylation	236219863891602	0	233212738037109	0	0	0	0	0	0							X
TVAG_268000	Hypothetical Protein	Proton Transmembrane Transport	259015712738037	251690559387207	262483291625977	278869285583496	268086986541748	276083011627197	0	0	261339473724365				X		X	X
TVAG_268810	Ste Family Protein Kinase	Protein Phosphorylation	234328804016113	0	222075881958008	238901329040527	22628942489624	221574287414551	0	0	0				X
TVAG_271570	Equilibrative Nucleoside Transporter, Putative	Organic Substance Transport	0	0	0	275295467376709	0	266514358520508	0	0	0	X		X				X
TVAG_272260	Clan Ih, Family I25, Phytocystatin-Like Peptidase Inh	Negative Regulation Of Endopeptidase Activity	247593879699707	0	249988193511963	248228912353516	248290023803711	259550685882568	0	0	0			X	X		X	X
TVAG_282070	Rab8, Putative	Intracellular Protein Transport	245334434509277	240276622772217	24572826385498	235884075164795	239213428497314	245987796783447	0	23857852935791	237465286254883		X	X	X		X	X
TVAG_282720	Serine/Threonine-Prote	Protein Dephosphorylation	242601184844971	231954135894775	233581008911133	233103580474854	0	230084190368652	0	0	0			X	X		X
TVAG_283640	Hypothetical Protein	Uncharacterized	0	0	229704971313477	0	237181644439697	23565580368042	0	0	0	X						X
TVAG_284580	Conserved Hypothetical Protein	Uncharacterized	0	237707214355469	241151351928711	0	0	0	0	0	0						X	X
TVAG_292550	Vacuolar Atp Synthase Subunit F, Putative	Ion Transport	244657554626465	0	241706619262695	0	0	24640417098999	0	0	0			X	X		X
TVAG_296770	Tryptophanyl-Trna Synthetase, Putative	Translation	232692794799805	231629085540771	229436016082764	227169094085693	231080188751221	22930196762085	0	0	0				X			X
TVAG_299410	Conserved Hypothetical Protein	Uncharacterized	226396675109863	225850639343262	0	244680576324463	238191909790039	257353115081787	0	0	0			X				X
TVAG_303180;TVAG_303520;TVAG_174040	Heat Shock Protein 70 (Hsp70)-4, Putative	Ubiquitin-Dependent Erad Pathway	226330947875977	0	225509586334229	236253337860107	226740493774414	228826713562012	0	0	0		X	X	X			X
TVAG_305020	Rab 19, 41 And, Putative	Intracellular Protein Transport	0	0	0	226077690124512	0	227699756622314	0	0	0							X
TVAG_310250;TVAG_314840	Phosphoenolpyruvate Carboxykinase, Putative	Gluconeogenesis	263522186279297	268075942993164	269499359130859	251542949676514	262337226867676	267717800140381	255182723999023	0	258337860107422		X	X	X		X
TVAG_317020	Clan Mg, Familly M24, Aminopeptidase P-Like Metallop	Proteolysis	243190689086914	242087345123291	249270076751709	238617382049561	249655208587646	243847560882568	0	0	0				X
TVAG_319810	Conserved Hypothetical Protein	Uncharacterized	251501560211182	0	259518489837646	0	0	0	0	0	0							X
TVAG_328570	Conserved Hypothetical Protein	Uncharacterized	226138725280762	240984439849854	23617956161499	250352344512939	251083698272705	247446308135986	0	0	0			X	X		X
TVAG_337250	Hiv-1 Rev Binding Protein, Hrbl, Putative	Regulation Of Catalytic Activity	246158256530762	242572422027588	245050640106201	252816066741943	253988151550293	252009391784668	0	0	0				X			X
TVAG_340740	Family T1, Proteasome Alpha Subunit, Threonine Peptidase	Ubiquitin-Dependent Protein Catabolic Process	254988403320313	266328411102295	27457010269165	263265285491943	262051773071289	265401268005371	268690299987793	26357027053833	264198913574219				X		X
TVAG_345870	Conserved Hypothetical Protein	Uncharacterized	0	240907936096191	229942607879639	2275270652771	224877777099609	0	0	0	0	X						X
TVAG_351320	Purine Nucleoside Phosphorylase, Putative	Uridine Catabolic Process	0	0	226340923309326	241368827819824	240500946044922	248443622589111	238963375091553	0	0			X	X		X
TVAG_358110	Enolase, Putative	Glycolytic Process	232398853302002	231936855316162	233997611999512	247516956329346	242942485809326	237383041381836	238909683227539	0	228848896026611		X	X	X		X
TVAG_367130;TVAG_367150;TVAG_367140;TVAG_364750	Clan Ma, Family M8, Leishmanolysin-Like Metallopeptidase	Proteolysis	0	234401245117188	232048606872559	229070510864258	243800067901611	243731842041016	273419780731201	270750026702881	269652118682861	X			X
TVAG_370070	Vacuolar Protein Sorting Protein, Putative	Protein Transport	0	0	219585094451904	243957786560059	233106346130371	238845539093018	0	0	0			X	X			X
TVAG_373720	Pyruvate Kinase, Putative	Glycolytic Process	232671375274658	219473152160645	236480102539063	274491596221924	260179710388184	268266296386719	0	0	229558353424072			X	X		X
TVAG_381470;TVAG_604670	Heat Shock Protein 70 (Hsp70)-4, Putative	Cellular Response To Unfolded Protein	219254970550537	0	212931118011475	247575073242188	218578338623047	217855644226074	0	0	0			X	X			X
TVAG_383370	Conserved Hypothetical Protein	Uncharacterized	241568431854248	234113159179688	232895431518555	256037673950195	235232486724854	239468154907227	239247894287109	241936264038086	0			X	X		X
TVAG_389740	Thioredoxin, Putative	Uncharacterized	242009010314941	234337711334229	237969932556152	250705051422119	25949535369873	256164150238037	0	0	0			X	X		X
TVAG_394720	Sugar-1-Phosphate Guanyl Transferase, Putative	Cell Wall Mannoprotein Biosynthetic Process	229944839477539	0	234440479278564	228663120269775	228644981384277	251807098388672	0	0	0			X	X
TVAG_396520	Conserved Hypothetical Protein	Positive Regulation Of Gene Expression	222720737457275	0	217115001678467	212889518737793	0	214142112731934	0	0	0							X
TVAG_405900	Phosphoglucomutase, Putative	Carbohydrate Metabolic Process	243009643554688	236839962005615	239885864257813	236641635894775	244002170562744	257923583984375	250118846893311	0	238021297454834				X
TVAG_406710	Ubiquitin-Conjugating Enzyme E2 L, Putative	Protein Polyubiquitination	244260482788086	242050838470459	243355865478516	256746520996094	0	229974002838135	250608520507813	250614280700684	246213703155518				X		X	X
TVAG_409800	Rab, Putative	Vesicle-Mediated Transport	0	0	0	247873592376709	238722057342529	238051853179932	0	0	0			X				X
TVAG_417590	Conserved Hypothetical Protein	Uncharacterized	0	245539131164551	245614490509033	274388084411621	274810829162598	270056037902832	0	0	0	X			X
TVAG_433200	60S Ribosomal Protein L23A, Putative	Ribosomal Large Subunit Assembly	0	25225564956665	252195587158203	26214656829834	248286151885986	247343311309814	0	0	249122333526611			X			X
TVAG_435990	Conserved Hypothetical Protein	Uncharacterized	239967098236084	242157115936279	251493034362793	267074089050293	257552165985107	266066780090332	240648860931396	0	0				X		X	X
TVAG_440110	Conserved Hypothetical Protein	Uncharacterized	243574981689453	252258224487305	249491786956787	0	0	223440246582031	0	0	0				X		X
TVAG_445420	Serine/Threonine Protein Phosphatase, Putative	Uncharacterized	242137851715088	23921070098877	236450443267822	234767951965332	227251739501953	2277854347229	0	0	0			X	X			X
TVAG_446910	Novel Plant Snare, Putative	Intracellular Protein Transport	235441570281982	0	239820709228516	257824172973633	2447314453125	249844188690186	0	0	0	X	X		X			X
TVAG_453990	Elongation Factor 1-Beta, Putative	Translation	252141189575195	237545032501221	241106815338135	246487236022949	247029266357422	245008773803711	0	0	0			X	X
TVAG_454230	Rab15, 13, 10, 1, 35, 5, And, Putative	Intracellular Protein Transport	233759708404541	0	231050472259521	235712642669678	227629585266113	2328489112854	0	0	0							X
TVAG_455110	Conserved Hypothetical Protein	Ubiquitin-Dependent Protein Catabolic Process	232467136383057	230099220275879	228047122955322	22736572265625	230557479858398	0	0	0	0				X
TVAG_459130	Profilin	Sequestering Of Actin Monomers	26286319732666	263382759094238	27574197769165	268519802093506	269828319549561	2728542137146	0	0	0			X	X		X	X
TVAG_462280	Nicotinate Phosphoribosyltransferase, Putative	Nad Biosynthetic Process	23521692276001	0	230048236846924	236997528076172	0	23503246307373	0	0	0			X	X
TVAG_462840	Heat Shock Protein 70Kd, Putative	Cellular Response To Unfolded Protein	241788883209229	239469051361084	234642601013184	0	0	0	0	0	0				X		X	X
TVAG_464410	Amp Dependent Ligase/Synthetase, Putative	Long-Chain Fatty Acid Metabolic Process	234877529144287	240383358001709	248753032684326	0	0	0	0	0	0							X
TVAG_467910	Conserved Hypothetical Protein	Vesicle Fusion	215328369140625	0	221246471405029	254012584686279	223866653442383	225372295379639	0	0	0	X		X	X			X
TVAG_470160	Arp2/3 Complex 20 Kd Subunit, Putative	Actin Filament Polymerization	0	248110294342041	25861572265625	242969818115234	0	249182071685791	0	0	0			X	X
TVAG_472690	Ap-2 Complex Subunit Beta-1, Putative	Intracellular Protein Transport	232979602813721	228301258087158	226210250854492	218510608673096	228422813415527	222335357666016	0	0	225079936981201			X	X
TVAG_478950	Charged Multivesicular Body Protein, Putative	Vesicle Budding From Membrane	242989387512207	229614448547363	235921783447266	241587696075439	236175079345703	244032764434814	0	0	0				X			X
TVAG_482020	Rho-Gap 92B, Putative	Signal Transduction	243819217681885	223601932525635	238222103118896	234844379425049	240300216674805	249046745300293	0	0	0				X			X
TVAG_482290	Small Gtpase Rabh, Putative	Intracellular Protein Transport	249330101013184	0	238103923797607	250078277587891	236045589447021	24962963104248	238875331878662	235784225463867	234477100372314			X	X			X
TVAG_485140	Conserved Hypothetical Protein	Uncharacterized	247422695159912	260845623016357	268082084655762	279208202362061	0	0	0	0	0							X
TVAG_496040	Conserved Hypothetical Protein	Lipid Metabolic Process	250371208190918	241523628234863	242709903717041	24595027923584	250407619476318	243425197601318	0	0	0						X	X
TVAG_496150	Conserved Hypothetical Protein	Uncharacterized	233768978118896	237231750488281	240055599212646	245687732696533	238652362823486	245768089294434	0	0	232871494293213				X			X
TVAG_496270	Phenylalanyl-Trna Synthetase Beta Chain, Putative	Translation	236523933410645	229998950958252	229353866577148	226286964416504	233248481750488	234976539611816	0	227402000427246	0			X	X
TVAG_524390	Conserved Hypothetical Protein	Uncharacterized	234062633514404	241288051605225	237744464874268	0	0	0	239975719451904	240400924682617	0				X
TVAG_542450;TVAG_223680;TVAG_188980;TVAG_494730;TVAG_352380	Multidrug Resistance Protein 1, 2, Putative	Transmembrane Transport	253933925628662	0	242935466766357	234839458465576	237252559661865	238303565979004	0	0	0			X				X
TVAG_006280	Rab, Putative	Vesicle Docking Involved In Exocytosis	244057445526123	238973522186279	242882061004639	248612651824951	0	244282875061035	0	0	0							X
TVAG_007830;TVAG_506800;TVAG_495740;TVAG_175700	Aldo/Keto Reductase, Putative	Uncharacterized	220460357666016	0	224901294708252	228666896820068	226457710266113	226589660644531	0	0	0				X
TVAG_010060	Conserved Hypothetical Protein	Uncharacterized	232566661834717	233729190826416	234444274902344	0	0	0	0	0	0							X
TVAG_010990	Conserved Hypothetical Protein	Uncharacterized	231321830749512	230353507995605	220923595428467	0	0	0	0	0	0				X			X
TVAG_011650	Charged Multivesicular Body Protein 1B, Putative	Vacuolar Transport	0	0	0	277845668792725	264626388549805	262955284118652	0	0	0			X				X
TVAG_013410	Hypothetical Protein	Small Gtpase Mediated Signal Transduction	218939685821533	0	228553447723389	0	0	0	0	0	0					X	X
TVAG_015950	Pyruvate Kinase, Putative	Glycolytic Process	242846794128418	0	242984504699707	247813682556152	235147266387939	247639007568359	0	0	0				X
TVAG_016600	Nad Dependent Epimerase/Dehydratase, Putative	Uncharacterized	222475109100342	0	227988719940186	224270343780518	234832077026367	226602516174316	0	0	0				X
TVAG_023840;TVAG_071780	Conserved Hypothetical Protein	Glycolytic Process	229769058227539	216570472717285	232157573699951	248402366638184	240655422210693	243338813781738	0	0	0				X
TVAG_028160	Cation-Transporting Atpase, Putative	Phospholipid Translocation	223939094543457	0	228852806091309	223746185302734	21741641998291	218943405151367	0	0	0	X		X				X
TVAG_034390	Conserved Hypothetical Protein	Uridine Catabolic Process	0	0	233150653839111	241472473144531	252549381256104	251389923095703	0	0	0			X	X
TVAG_037100	Vamp-4, Putative	Vesicle-Mediated Transport	239538478851318	231844234466553	240707111358643	267244243621826	248194351196289	25637767791748	0	0	234119625091553	X		X	X			X
TVAG_038950	Rabx3 Protein, Putative	Vesicle Docking Involved In Exocytosis	0	240625	238163623809814	244256000518799	243865337371826	242812881469727	0	0	0			X	X			X
TVAG_039070	Vesicle Transport V-Snare Protein Vti1A, Putative	Intracellular Protein Transport	0	0	239963645935059	252244606018066	25451488494873	256135807037354	0	0	0				X			X
TVAG_040090;TVAG_547520;TVAG_391870;TVAG_387920;TVAG_337280;TVAG_337290	Cysteine Synthase, Putative	Cysteine Biosynthetic Process From Serine	242674942016602	0	244128036499023	246376571655273	242379760742188	247770595550537	0	0	0			X	X
TVAG_041310	Ornithine Carbamoyltransferase, Putative	Cellular Amino Acid Metabolic Process	0	0	261339664459229	270908336639404	279070148468018	26847448348999	0	0	0			X	X		X
TVAG_047250	Agc Family Protein Kinase	Protein Phosphorylation	230938758850098	0	220312347412109	216801586151123	0	221087856292725	0	0	0				X			X
TVAG_048780	Conserved Hypothetical Protein	Uncharacterized	241346130371094	234247035980225	242967014312744	0	0	0	0	0	0				X			X
TVAG_059030	Amp Dependent Ligase/Synthetase, Putative	Long-Chain Fatty Acid Metabolic Process	225642547607422	240575504302979	244515514373779	0	0	0	0	0	0						X	X
TVAG_063200	Conserved Hypothetical Protein	Uncharacterized	242120056152344	0	23898645401001	259020080566406	244501667022705	24150505065918	0	0	0				X			X
TVAG_068810	Syntaxin, Putative	Uncharacterized	0	0	241109199523926	251342220306396	25018310546875	249722862243652	0	0	0			X	X			X
TVAG_071720	Conserved Hypothetical Protein	Uncharacterized	0	247720317840576	241248664855957	22771427154541	239730739593506	231187191009521	0	0	0						X	X
TVAG_072700	Nadh Dehydrogenase 51 Kda Subunit, Putative	Nucleobase-Containing Compound Metabolic Process	238917102813721	0	237609100341797	24632007598877	249547348022461	259272346496582	0	0	0				X			X
TVAG_075460;TVAG_395320	Rab5B, Putative	Uncharacterized	0	0	0	224159641265869	236525039672852	23580379486084	0	0	0							X
TVAG_079570	Rabx19 Protein, Putative	Intracellular Protein Transport	236686058044434	235985527038574	233277282714844	248943023681641	239258766174316	240573844909668	0	0	0			X	X			X
TVAG_081750	Serine/Threonine-Prot	Regulation Of Catalytic Activity	221025505065918	0	0	223964195251465	0	227980213165283	0	0	0				X
TVAG_370820;TVAG_283240;TVAG_212620;TVAG_197730;TVAG_124410;TVAG_099020;TVAG_083720;TVAG_083700	60S Ribosomal Protein L37A, Putative	Uncharacterized	0	0	0	241491870880127	0	244424667358398	0	0	0				X
TVAG_087590	Clan Me, Family M16, Insulinase-Like Metallopeptidase	Proteolysis	235429763793945	0	23252140045166	243154106140137	245570735931396	24875207901001	0	0	0				X
TVAG_090070	Conserved Hypothetical Protein	Uncharacterized	0	234508590698242	234185409545898	250129928588867	240874805450439	245328483581543	0	0	0				X
TVAG_092730	Inosine-Uridine Preferring Nucleoside Hydrolase, Putati	Nucleobase-Containing Compound Metabolic Process	209235401153564	217466106414795	23152795791626	262231178283691	242438697814941	254914283752441	0	0	0			X	X
TVAG_099180	Conserved Hypothetical Protein	Uncharacterized	0	234120922088623	240932941436768	256163597106934	24974781036377	249472618103027	0	0	0	X						X
TVAG_101660	Hypothetical Protein	Uncharacterized	23567554473877	237485771179199	237420120239258	244243831634521	253234386444092	241775970458984	0	0	0
TVAG_112100	Conserved Hypothetical Protein	Uncharacterized	253661308288574	259003276824951	250354442596436	0	0	0	0	0	0							X
TVAG_121530	Conserved Hypothetical Protein	Uncharacterized	228258228302002	0	228819618225098	25269172668457	2516188621521	245311832427979	0	0	0		X	X	X			X
TVAG_121630	Conserved Hypothetical Protein	Uncharacterized	23660795211792	0	2325364112854	230058174133301	22869026184082	216635341644287	0	0	0				X
TVAG_122240	Clan Ma, Family M8, Leishmanolysin-Like Protein	Proteolysis	222034721374512	0	24881477355957	248207015991211	238773632049561	243961067199707	0	0	0	X			X
TVAG_122270;TVAG_474310	Rab, Putative	Vesicle Docking Involved In Exocytosis	0	0	0	238824100494385	0	230935039520264	0	0	0			X				X
TVAG_122750	Conserved Hypothetical Protein	Dna Metabolic Process	0	229228324890137	231877346038818	238313236236572	246982688903809	251917457580566	0	0	0	X						X
TVAG_123500	Ste Family Protein Kinase	Protein Phosphorylation	235576572418213	0	233974132537842	23147123336792	233786182403564	228039245605469	0	0	0				X			X
TVAG_128690	Conserved Hypothetical Protein	Endosome To Lysosome Transport	0	0	0	235090579986572	228177871704102	220100078582764	0	0	0							X
TVAG_128860	Rab-18, Putative	Intracellular Protein Transport	232661361694336	228822803497314	232467002868652	241958045959473	241965560913086	251708526611328	0	0	0			X	X			X
TVAG_130180	Conserved Hypothetical Protein	Uncharacterized	22209077835083	0	21958438873291	231845893859863	230601425170898	231289463043213	0	0	0			X	X
TVAG_133120	Sulfate Adenylyltransferase Subunit, Putative	Translation	234189262390137	0	0	23026969909668	226854515075684	231916999816895	0	0	0				X
TVAG_136640	Phenylalanyl-Trna Synthetase Alpha Chain, Putative	Translation	242340335845947	229112281799316	228136043548584	224566860198975	233617191314697	231566581726074	220449352264404	0	222419967651367				X
TVAG_137310	Conserved Hypothetical Protein	Uncharacterized	234073028564453	0	235711479187012	0	212739524841309	213437538146973	0	0	0				X
TVAG_139210	Conserved Hypothetical Protein	Uncharacterized	0	0	273297138214111	273336429595947	275659446716309	289939117431641	0	0	0
TVAG_140850	Conserved Hypothetical Protein	Uncharacterized	25756031036377	266884574890137	269956111907959	234521160125732	231325912475586	229547710418701	262814292907715	253734512329102	260845031738281	X			X	X	X
TVAG_140990	Conserved Hypothetical Protein	Uncharacterized	234374599456787	240643920898438	236372146606445	228473949432373	228718852996826	221887302398682	0	0	0	X			X			X
TVAG_150120	Conserved Hypothetical Protein	Uncharacterized	232685661315918	227477798461914	224892730712891	0	0	0	0	0	0							X
TVAG_159810;TVAG_122340	Small Gtpase Rab, Putative	Vesicle Docking Involved In Exocytosis	240626640319824	237913398742676	232534828186035	246861362457275	228170070648193	225660915374756	0	0	230300559997559			X	X			X
TVAG_160650;TVAG_381680;TVAG_018070;TVAG_112090;TVAG_241930;TVAG_570250;TVAG_503630	Conserved Hypothetical Protein	Small Gtpase Mediated Signal Transduction	237078838348389	0	0	23841438293457	0	238088226318359	0	0	0							X
TVAG_160820	Vacuolar Protein Sorting 26, Vps26, Putative	Intracellular Protein Transport	0	0	0	227854442596436	225740852355957	221690406799316	0	0	0
TVAG_172120	Conserved Hypothetical Protein	Uncharacterized	214753112792969	0	234652557373047	0	242821369171143	261855773925781	0	0	0	X			X
TVAG_173580	Gh Regulated Tbc Protein-1, Putative	Activation Of Gtpase Activity	21974458694458	0	220747013092041	0	0	0	0	0	0							X
TVAG_174220	Conserved Hypothetical Protein	Uncharacterized	0	0	227153186798096	24180103302002	232066802978516	231549911499023	0	0	0
TVAG_176050	Conserved Hypothetical Protein	Uncharacterized	252174892425537	262490711212158	26804027557373	29027229309082	285413761138916	280393085479736	0	0	0
TVAG_177180	Wd-Repeat Protein, Putative	Actin Filament Organization	252907733917236	247247352600098	243635921478271	0	247870101928711	250071868896484	0	0	0			X	X
TVAG_183790	Malic Enzyme, Putative	Pyruvate Metabolic Process	0	242222137451172	249939498901367	0	0	0	0	0	0			X	X
TVAG_192440	Rac, Putative	Intracellular Protein Transport	228692512512207	236616649627686	235965061187744	226277179718018	222042198181152	224937744140625	24052583694458	0	237907428741455				X		X	X
TVAG_193820	Circumsporozoite Protein Precursor, Putative	Uncharacterized	24316930770874	0	248489532470703	239028816223145	0	232278785705566	0	0	0				X			X
TVAG_198680	40S Ribosomal Protein S7, Putative	Rrna Processing	233165855407715	0	0	241010131835938	22993724822998	236551265716553	233892936706543	0	0	X			X
TVAG_206830	Conserved Hypothetical Protein	Uncharacterized	0	0	227384490966797	235926342010498	232560920715332	228431072235107	0	0	0							X
TVAG_216210	Phosphotyrosyl Phosphatase Activator, Putative	Mitotic Spindle Organization	0	0	0	0	23042049407959	231253395080566	0	0	0				X
TVAG_216360	Nadph Cytochrome P450, Putative	Uncharacterized	235102653503418	0	0	235717258453369	236967849731445	226528091430664	0	0	0			X	X			X
TVAG_217740	Conserved Hypothetical Protein	Uncharacterized	0	24501485824585	243385124206543	228047904968262	236973152160645	234015846252441	0	0	0	X						X
TVAG_228930	Acid Phosphatase, Putative	Dephosphorylation	0	236778812408447	242867259979248	266590805053711	246486148834229	249844188690186	0	0	236740055084229				X			X
TVAG_230820;TVAG_077020	Adaptin, Alpha/Gamma/Epsilon, Putative	Intracellular Protein Transport	0	221132125854492	230625820159912	236067066192627	228868255615234	227190437316895	0	0	0				X			X
TVAG_231160	26S Proteasome Regulatory Subunit, Putative	Regulation Of Protein Catabolic Process	243249168395996	241676025390625	241698970794678	220491962432861	228178844451904	223765277862549	0	0	0				X
TVAG_247370	Conserved Hypothetical Protein	Uncharacterized	0	239730739593506	239261474609375	0	0	0	0	0	0	X					X	X
TVAG_247500	Charged Multivesicular Body Protein 1B, Putative	Vacuolar Transport	0	0	0	24635721206665	239807643890381	0	0	0	0				X			X
TVAG_305580;TVAG_249040	Conserved Hypothetical Protein	Actin Filament Organization	243121585845947	244430370330811	245677871704102	249503803253174	246124000549316	247909908294678	0	0	0		X		X			X
TVAG_256720	Conserved Hypothetical Protein	Cellular Oxidant Detoxification	0	0	247854652404785	246785259246826	249676761627197	246512451171875	0	0	0				X
TVAG_261590	F-Actin Capping Protein Beta Subunit, Putative	Cell Morphogenesis	0	0	228122730255127	24176607131958	241154518127441	245601081848145	0	0	0		X					X
TVAG_261970;TVAG_420510;TVAG_420500	Carbamate Kinase, Putative	Arginine Metabolic Process	234425296783447	231280498504639	232214622497559	282321033477783	273118991851807	278777141571045	242213287353516	249832878112793	241626930236816			X	X		X
TVAG_262370	Conserved Hypothetical Protein	Uncharacterized	0	247332954406738	238447933197021	0	0	243521175384521	0	0	0				X			X
TVAG_263250	Isoleucyl, Leucyl, Tyrosyl, Valyl And	Translation	226304092407227	0	216997318267822	219027156829834	0	215449123382568	0	227699356079102	0				X
TVAG_267860	Leucine-Rich Repeat Protein, Bspa Family	Uncharacterized	0	0	0	221161346435547	217931270599365	0	0	0	0
TVAG_271840	F-Actin Capping Protein Beta Subunit, Putative	Cell Morphogenesis	0	0	0	224120655059814	237526664733887	251310062408447	0	0	238270645141602		X	X			X
TVAG_290120	Conserved Hypothetical Protein	Uncharacterized	249062805175781	24811616897583	24791389465332	0	0	242475700378418	0	0	0	X		X	X			X
TVAG_291530	Conserved Hypothetical Protein	Uncharacterized	236606864929199	0	231160068511963	254273910522461	245986099243164	23851957321167	0	0	0							X
TVAG_293370	Nucleoside Diphosphate Kinase, Putative	Nucleoside Diphosphate Phosphorylation	266474628448486	251281356811523	253635921478271	268376178741455	27699686050415	273815422058105	0	0	0		X		X			X
TVAG_298080	Clan Ca, Family C1, Cathepsin L-Like Cysteine Peptidase	Proteolysis	0	270008850097656	264982624053955	263862705230713	258143825531006	265407619476318	0	0	0			X	X
TVAG_298300	Dynamin, Putative	Uncharacterized	239340915679932	223384323120117	229452095031738	2310671043396	221299362182617	235647678375244	0	0	0			X	X		X	X
TVAG_300850;TVAG_124050	Conserved Hypothetical Protein	Uncharacterized	226228122711182	0	223997859954834	221835308074951	219438152313232	222606639862061	0	0	0				X
TVAG_301870	Conserved Hypothetical Protein	Uncharacterized	243970851898193	0	238822231292725	229964332580566	245209732055664	257451953887939	0	0	0	X						X
TVAG_304280	Conserved Hypothetical Protein	Proton Transmembrane Transport	261848773956299	0	273757553100586	281008415222168	273548107147217	279612979888916	0	0	0				X
TVAG_304980	Copine, Putative	Cellular Response To Calcium Ion	232882766723633	0	235244445800781	242692089080811	227479438781738	239791946411133	0	0	0							X
TVAG_317730	Endoplasmic Reticulum-Golgi Intermediate C	Uncharacterized	230270042419434	238638191223145	235208530426025	0	0	0	0	0	0							X
TVAG_320210	Conserved Hypothetical Protein	Cell Morphogenesis	230520706176758	0	225581474304199	217251739501953	224665260314941	219915466308594	0	0	0							X
TVAG_323360	Conserved Hypothetical Protein	Uncharacterized	0	0	227333679199219	244974098205566	0	235066394805908	0	0	0				X
TVAG_324920	Ribosomal Protein S15P/S13E, Putative	Translation	244170589447021	0	0	0	239162483215332	229300537109375	0	0	0			X			X
TVAG_327050	Ankyrin, Putative	Uncharacterized	243246421813965	246673069000244	242718467712402	250277462005615	235330276489258	234506072998047	0	0	0
TVAG_327610	Ethanolamine-Phosphate Cytidylyltransferase, Putative	Phosphatidylethanolamine Biosynthetic Process	0	0	0	232936172485352	244982013702393	243039627075195	0	0	0				X
TVAG_328510	Conserved Hypothetical Protein	Intracellular Protein Transport	214187984466553	0	222126426696777	221819229125977	226688442230225	222596874237061	0	0	0							X
TVAG_333110	Conserved Hypothetical Protein	Intracellular Mrna Localization	0	0	0	249338665008545	237951107025146	239061889648438	0	0	0				X
TVAG_336300	Clan Aa, Family A1, Cathepsin D-Like Aspartic Peptidase	Proteolysis	0	0	236675243377686	25382251739502	22758939743042	246943950653076	0	0	0				X
TVAG_337850	Amp Dependent Coa Ligase, Putative	Long-Chain Fatty Acid Metabolic Process	243061218261719	261147975921631	261279392242432	0	0	0	0	0	0						X	X
TVAG_341380	Nucleoside Diphosphate Kinase, Putative	Nucleoside Diphosphate Phosphorylation	252275123596191	0	246914691925049	251139030456543	253072681427002	257835922241211	0	0	0		X	X	X
TVAG_343980	Conserved Hypothetical Protein	Uncharacterized	23695405960083	245240859985352	242876415252686	0	0	0	0	0	0				X			X
TVAG_344540	Mainte0Ce Of Ploidy Protein Mob1, Putative	Positive Regulation Of Protein Phosphorylation	258964748382568	258268222808838	262017421722412	256943168640137	263341197967529	262518901824951	0	0	0			X	X			X
TVAG_345110	Conserved Hypothetical Protein	Uncharacterized	0	236660079956055	0	254004783630371	243682632446289	226923217773438	0	0	0							X
TVAG_353480	Conserved Hypothetical Protein	Endosome To Lysosome Transport	229245719909668	0	222671089172363	246001415252686	234938716888428	234933834075928	222915668487549	0	22856351852417		X	X	X			X
TVAG_358240	Conserved Hypothetical Protein	Uncharacterized	240801773071289	241064548492432	244819774627686	259466819763184	257132949829102	253857440948486	248757247924805	0	245103874206543	X						X
TVAG_358270	Conserved Hypothetical Protein	Uncharacterized	0	0	0	244155769348145	239915294647217	233892936706543	0	0	0
TVAG_360920	Conserved Hypothetical Protein	Uncharacterized	0	236278953552246	234622631072998	240517539978027	237523593902588	230802917480469	0	0	0				X		X
TVAG_361480	Nascent Polypeptide Associated Complex Alpha Subun	Protein Targeting To Membrane	0	0	243218231201172	270364284515381	258183860778809	263002319335938	0	0	0				X
TVAG_370050	Leucine-Rich Repeat Protein, Bspa Family	Uncharacterized	0	0	22892894744873	235261173248291	241453819274902	237158622741699	0	0	0							X
TVAG_370490	Clan Mh, Family M20, Peptidase T-Like Metallopeptidase	Proteolysis	230097351074219	224443778991699	233429946899414	247383575439453	246984825134277	256294536590576	0	0	236867771148682			X	X
TVAG_372200	Alpha-1,3-Mannosyltransferase, Putative	Protein Glycosylation	0	236257801055908	228894653320313	0	0	0	0	0	0							X
TVAG_379940	Clan Mh, Family M20, Peptidase T-Like Metallopeptidase	Proteolysis	229981746673584	0	240562267303467	261850280761719	237224445343018	253261852264404	0	0	0				X
TVAG_380910	Dead Box Atp-Dependent Rna Helicase, Putative	Translational Initiation	237850646972656	223367977142334	225924739837646	216441211700439	22127986907959	221038951873779	0	0	0	X		X	X
TVAG_388260	Utp-Glucose-1-Phosphate Uridylyltransferase, Putative	Glycogen Metabolic Process	224520664215088	0	0	235302906036377	2392795753479	23602409362793	0	0	0			X	X		X
TVAG_394040	Heat Shock Protein 70Kd, Putative	Ubiquitin-Dependent Erad Pathway	216231021881104	0	20073263168335	248384113311768	215334548950195	231899967193604	0	0	0		X	X	X			X
TVAG_398950	Conserved Hypothetical Protein	Uncharacterized	25608512878418	0	0	236185169219971	262845039367676	252233924865723	279761257171631	281396560668945	2785910987854
TVAG_399470	Conserved Hypothetical Protein	Lipid Metabolic Process	235613918304443	225656509399414	229242095947266	247990207672119	247035064697266	23608850479126	0	0	0							X
TVAG_405170	Twinfilin, Putative	Actin Filament Depolymerization	237756519317627	0	237209854125977	235234870910645	23703031539917	247716789245605	0	0	0		X	X	X			X
TVAG_409990	Ergosterol Biosynthesis Protein, Putative	Sterol Transport	227275009155273	0	22637523651123	220183181762695	222185688018799	222800273895264	0	0	0				X			X
TVAG_413780	Glial Maturation Factor, Putative	Negative Regulation Of Arp2/3 Complex-Mediated Actin Nucleation	0	0	242744789123535	244173812866211	246002559661865	248383140563965	0	0	0			X	X
TVAG_414190	Conserved Hypothetical Protein	Uncharacterized	0	0	228660469055176	0	222568111419678	222359619140625	0	0	0	X		X	X			X
TVAG_414300	2,3-Bisphosphoglycerate-Independent Phospho	Glycolytic Process	242229518890381	227619667053223	23871265411377	235845146179199	253365058898926	239402885437012	0	0	0				X
TVAG_419720	Aspartate Aminotransferase, Putative	Biosynthetic Process	232177848815918	23500207901001	235273113250732	238278408050537	238593692779541	244750022888184	252412185668945	253314914703369	258704433441162			X	X
TVAG_430210	Aspartate Aminotransferase, Putative	Biosynthetic Process	227949523925781	224005947113037	0	215347385406494	23247106552124	227002830505371	229054927825928	0	0				X
TVAG_430700;TVAG_127920	Conserved Hypothetical Protein	Uncharacterized	230759906768799	0	0	242450313568115	0	224092464447021	0	0	0							X
TVAG_436310	Conserved Hypothetical Protein	Cell Migration	223329257965088	0	222302265167236	266024379730225	254402503967285	261949977874756	0	0	0
TVAG_437950	Conserved Hypothetical Protein	Uncharacterized	239094886779785	246171169281006	241155319213867	0	226415863037109	221181316375732	0	0	0							X
TVAG_438030	Proteasome Regulatory Subunits, Putative	Uncharacterized	226051254272461	224134349822998	222283782958984	0	218135070800781	213651695251465	228169860839844	0	222506656646729				X		X
TVAG_444510	Adenosine Diphosphatase, Putative	Nucleoside Diphosphate Catabolic Process	233458385467529	242927055358887	235580081939697	235252799987793	236197490692139	22976505279541	0	0	0	X		X			X	X
TVAG_447230	Conserved Hypothetical Protein	Uncharacterized	229456920623779	0	238440265655518	0	0	0	0	0	0							X
TVAG_453110	Atp Synthase Alpha Subunit Mitochondrial, Putative	Ion Transport	251625022888184	0	258943481445313	252367000579834	0	257128753662109	0	0	0		X	X	X			X
TVAG_455090	Conserved Hypothetical Protein	Uncharacterized	234625129699707	230678749084473	245919494628906	0	0	0	0	0	0				X			X
TVAG_460580	Plasma Membrane Calcium-Transporting Atpase, Putative	Ion Transport	235301723480225	23526237487793	246915760040283	228106861114502	236328964233398	237362422943115	0	0	0	X						X
TVAG_464050	40S Ribosomal Protein S12, Putative	Translation	248994750976563	0	246853332519531	256976070404053	252537498474121	250354862213135	0	0	0			X	X
TVAG_468280	Conserved Hypothetical Protein	Uncharacterized	24723331451416	243688621520996	244046401977539	246033706665039	244720306396484	236427326202393	0	0	0				X			X
TVAG_473460	Conserved Hypothetical Protein	Protein Folding	0	0	0	244906940460205	24203592300415	233726539611816	0	0	0				X
TVAG_475160	Hsp90 Co-Chaperone, Putative	Protein Folding	245575408935547	244355525970459	244547538757324	249581909179688	254160938262939	252011623382568	0	0	0				X
TVAG_476220	Conserved Hypothetical Protein	Uncharacterized	24137508392334	248470897674561	24055814743042	0	0	0	0	0	0				X		X
TVAG_487100	Conserved Hypothetical Protein	Uncharacterized	0	0	224857158660889	231035442352295	233618545532227	237292041778564	0	0	0				X			X
TVAG_487950	Spbc4B4.06 Protein, Putative	Protein Transport	0	0	219462089538574	237181644439697	230959854125977	232658500671387	0	0	0							X
TVAG_489820	Ck1 Family Protein Kinase	Protein Phosphorylation	0	0	224581890106201	218805809020996	0	220559959411621	0	0	0							X
TVAG_490150	Rho Gdp-Dissociation Inhibitor, Putative	Rho Protein Signal Transduction	238892040252686	0	234894695281982	250141429901123	240879650115967	250112457275391	0	0	0				X			X
TVAG_497260	Axonmeal Dynein Heavy Chain, Putative	Microtubule-Based Movement	214035358428955	0	212714462280273	0	0	233556842803955	0	0	0			X			X
TVAG_498660	Vacuolar Proton Atpase, Putative	Ion Transport	244277744293213	242386322021484	237582702636719	236237716674805	234128665924072	22917724609375	0	0	0							X
TVAG_498960	Ribosomal Protein S2, Eukaryotic And Archaeal Form,	Ribosomal Small Subunit Assembly	0	253117446899414	249258308410645	0	0	222615814208984	0	0	0			X	X
TVAG_525700;TVAG_522470;TVAG_549130;TVAG_530720;TVAG_537480;TVAG_504090;TVAG_103680;TVAG_207990;TVAG_562010	Conserved Hypothetical Protein	Uncharacterized	239005813598633	252573146820068	256326465606689	0	0	0	0	0	0	X
TVAG_527180	Rab, Putative	Vesicle-Mediated Transport	232162456512451	0	233482723236084	239349002838135	0	247005462646484	0	0	0				X			X
TVAG_542470	Atp-Binding Cassette Transporter, Putative	Transmembrane Transport	239202537536621	0	236533794403076	0	0	222513313293457	0	0	0							X
TVAG_547420	Conserved Hypothetical Protein	Uncharacterized	0	263246421813965	266574459075928	0	250698089599609	0	0	0	0	X			X
TVAG_000070	Methionyl-Trna Synthetase, Putative	Uncharacterized	0	0	232328777313232	264367446899414	250432682037354	251952419281006	0	0	0				X			X
TVAG_001870	Bet5, Putative	Endoplasmic Reticulum To Golgi Vesicle-Mediated Transport	0	0	0	216348915100098	0	210861511230469	0	0	0				X
TVAG_003950	Conserved Hypothetical Protein	Uncharacterized	0	0	0	260822296142578	227076091766357	247392330169678	0	0	0			X	X			X
TVAG_005750	Ctl2, Putative	Transmembrane Transport	0	0	235438022613525	266393413543701	249627876281738	251667213439941	0	0	0	X						X
TVAG_006260;TVAG_498380;TVAG_174140;TVAG_423520	Gtp-Binding Protein Ypt10, Putative	Intracellular Protein Transport	231161670684814	0	239117774963379	249311618804932	242757587432861	253259792327881	0	0	0			X	X			X
TVAG_006480	Axonemal Dynein Gamma Heavy Chain, Putative	Microtubule-Based Movement	219122886657715	220712013244629	227704601287842	0	208342990875244	242728424072266	0	0	221076049804688						X
TVAG_010980	Conserved Hypothetical Protein	Uncharacterized	0	0	241074924468994	262747097015381	246534328460693	24276538848877	0	0	244699821472168
TVAG_013310	Alpha Chimerin, Putative	Signal Transduction	0	0	213169994354248	216310749053955	0	216484718322754	0	0	0				X
TVAG_021650	Conserved Hypothetical Protein	Vesicle Cytoskeletal Trafficking	0	0	0	222854290008545	0	213466777801514	0	0	0			X				X
TVAG_027240	Eif-1A, Putative	Translation	0	0	0	254043807983398	0	238824100494385	0	0	0				X
TVAG_028650	Conserved Hypothetical Protein	Uncharacterized	0	0	22804220199585	237578620910645	228336620330811	241884288787842	0	0	0				X			X
TVAG_029680	Conserved Hypothetical Protein	Uncharacterized	0	23356086730957	230130958557129	20971549987793	0	209839153289795	0	0	0							X
TVAG_030480	Phage Shock Protein E Precursor, Putative	Uncharacterized	0	0	248655185699463	262470436096191	0	24672981262207	0	0	0				X			X
TVAG_031030	Adaptin Ear-Binding Coat-Associated Protein, Putative	Endocytosis	236371040344238	0	233315601348877	250034599304199	244830226898193	246796531677246	0	0	0				X			X
TVAG_031330	Protein Phosphatase-1, Putative	Uncharacterized	0	0	220193023681641	226133327484131	224473819732666	22384822845459	0	0	0				X			X
TVAG_032440;TVAG_064340;TVAG_032450;TVAG_064350	Clan Ma, Family M8, Leishmanolysin-Like Metallopeptidase	Proteolysis	0	209030113220215	217523803710938	22845329284668	250719795227051	258095817565918	0	0	0	X			X			X
TVAG_034140	Clan Ca, Family C1, Papain-Like Cysteine Peptidase	Proteolysis	0	0	237758541107178	240076999664307	0	251161270141602	0	0	0				X
TVAG_038440	Fructose-Bisphosphate Aldolase, Putative	Carbohydrate Metabolic Process	0	235751934051514	0	255710029602051	266829795837402	267034549713135	0	0	0			X	X
TVAG_044950	Conserved Hypothetical Protein	Uncharacterized	0	261208000183105	259628753662109	0	0	0	0	0	0							X
TVAG_045340	Polyadenylate-Binding Protein, Putative	Uncharacterized	0	0	226432399749756	253796443939209	236176204681396	23644495010376	0	0	0				X		X
TVAG_047800	Rab11, Putative	Intracellular Protein Transport	0	255085735321045	247030849456787	236868839263916	235491027832031	232122421264648	0	0	0				X			X
TVAG_051090	Clan Sc, Family S9, Acylaminoacyl-Peptidase-Lik	Proteolysis	224706783294678	224966049194336	229108810424805	241878242492676	232602615356445	232678527832031	0	0	0				X			X
TVAG_052730	Rabx20 Protein, Putative	Intracellular Protein Transport	0	0	0	2646706199646	267490634918213	251207599639893	0	0	0							X
TVAG_056100	Conserved Hypothetical Protein	Protein Folding	238221130371094	0	246656818389893	249197540283203	250422649383545	249784526824951	0	0	0				X			X
TVAG_057360;TVAG_479560	Uridine Cytidine Kinase I, Putative	Phosphorylation	230908432006836	0	0	235604591369629	240856971740723	243710594177246	245318984985352	237008113861084	240087261199951				X
TVAG_062260;TVAG_431150	Conserved Hypothetical Protein	Uncharacterized	214370021820068	208769512176514	226366176605225	237723331451416	219485988616943	228141136169434	0	0	0
TVAG_062360	Dynamin, Putative	Uncharacterized	0	0	0	228755836486816	0	222371597290039	0	0	0			X	X			X
TVAG_065750	Sucrose Transport Protein, Putative	Sucrose Transport	0	0	0	0	228576431274414	232884159088135	0	0	0	X						X
TVAG_072140	Conserved Hypothetical Protein	Uncharacterized	0	0	252988338470459	258411254882813	0	252869720458984	0	0	0				X			X
TVAG_075770	Hypothetical Protein	Uncharacterized	0	0	0	221345825195313	0	214178199768066	0	0	0	X						X
TVAG_078350	Conserved Hypothetical Protein	Uncharacterized	224158611297607	0	22530933380127	249960632324219	236389827728271	238884620666504	212018585205078	0	0				X		X
TVAG_080700	Vacuolar Membrane Protein Pep11, Putative	Vesicle Docking Involved In Exocytosis	0	222142448425293	227026519775391	0	220165519714355	225903511047363	0	0	0							X
TVAG_082020	Conserved Hypothetical Protein	Uncharacterized	0	22418514251709	234552555084229	0	0	0	0	0	0							X
TVAG_084340	Conserved Hypothetical Protein	Intracellular Protein Transport	232543621063232	0	224088840484619	222472801208496	0	22367036819458	0	0	0	X						X
TVAG_091180;TVAG_271660	Crustacean Calcium-Binding Protein, Putative	Uncharacterized	0	0	225884532928467	223631114959717	222276153564453	0	0	0	0				X
TVAG_091440	Conserved Hypothetical Protein	Transmembrane Transport	25228796005249	239443168640137	247618751525879	247787132263184	239915294647217	0	0	0	0							X
TVAG_095390	Conserved Hypothetical Protein	Uncharacterized	0	236591625213623	234150619506836	258468265533447	249637584686279	243774280548096	0	0	0							X
TVAG_100030	Conserved Hypothetical Protein	Intracellular Protein Transport	0	0	0	0	227020587921143	228972415924072	0	0	0							X
TVAG_431350;TVAG_324900;TVAG_190290;TVAG_101690	60S Ribosomal Protein L24, Putative	Uncharacterized	0	0	0	263541374206543	0	252161560058594	0	0	0			X				X
TVAG_102980	Conserved Hypothetical Protein	Ribosomal Large Subunit Assembly	0	0	0	226122970581055	0	214913539886475	0	0	0				X
TVAG_106710	Conserved Hypothetical Protein	Uncharacterized	23529577255249	0	230997772216797	0	227251949310303	23526237487793	0	0	0				X
TVAG_108450	Rac Gtpase, Putative	Signal Transduction	231346759796143	0	226826248168945	234429092407227	221517124176025	226120738983154	0	0	0							X
TVAG_114870	Clan Sc, Family S28, Unassigned Serine Peptidase	Proteolysis	218740272521973	0	227746086120605	241516666412354	24294319152832	237040882110596	0	0	0				X			X
TVAG_118190	Charged Multivesicular Body Protein 6-A, Putative	Vesicle Budding From Membrane	0	0	239877185821533	238460369110107	251807479858398	255366191864014	0	0	0
TVAG_119110	Conserved Hypothetical Protein	Uncharacterized	0	0	23581413269043	242135639190674	237195224761963	24126522064209	0	0	0				X			X
TVAG_121370	Conserved Hypothetical Protein	Uncharacterized	244411373138428	251225395202637	24415319442749	0	0	0	0	0	0				X		X	X
TVAG_121660	Conserved Hypothetical Protein	Uncharacterized	0	0	0	232948799133301	0	227044048309326	0	0	0				X
TVAG_122500	Syntaxin, Putative	Intracellular Protein Transport	0	238329658508301	241232109069824	24909122467041	251552619934082	248562393188477	0	0	0				X			X
TVAG_123490	Conserved Hypothetical Protein	Uncharacterized	236284523010254	236297874450684	240652141571045	241474800109863	237198371887207	235359954833984	0	0	0	X						X
TVAG_123810	Amp Dependent Ligase/Synthetase, Putative	Long-Chain Fatty Acid Metabolic Process	0	219766960144043	232193222045898	0	0	0	0	0	0							X
TVAG_125500	Thioredoxin, Putative	Uncharacterized	241875228881836	0	236234378814697	2532106590271	253760032653809	254493789672852	0	0	243735160827637			X	X		X
TVAG_126090	Clan Ca, Family C1, Cathepsin L Or H-Like Cysteine P	Proteolysis	228358020782471	240306949615479	237209854125977	257636737823486	260772457122803	252503547668457	0	0	0							X
TVAG_129610	Conserved Hypothetical Protein	Uncharacterized	0	0	218006114959717	227962589263916	0	213624954223633	0	0	0			X				X
TVAG_133060	Udp- Glucose Pyrophosphorylase, Putative	Udp-N-Acetylglucosamine Biosynthetic Process	0	0	225390529632568	245957660675049	243368797302246	23744478225708	0	0	0				X		X
TVAG_133950;TVAG_398770	2-Deoxyglucose-6-Phosphate Phosphatase, Putative	Uncharacterized	225011806488037	0	224161968231201	0	228921737670898	236079483032227	0	0	0				X
TVAG_134990	Translation Factor Sui1, Putative	Translational Initiation	0	0	0	233474617004395	0	225666732788086	0	0	0				X			X
TVAG_135190	Cytidine Deaminase, Putative	Cytidine Deamination	248817577362061	0	0	24055814743042	0	244707889556885	0	254070434570313	264509220123291			X	X		X
TVAG_140630	Conserved Hypothetical Protein	Uncharacterized	221171188354492	0	2318310546875	229630336761475	0	248904113769531	0	0	0
TVAG_146100	Conserved Hypothetical Protein	Uncharacterized	0	0	238994750976563	0	239496688842773	241542949676514	0	0	0
TVAG_149320	Conserved Hypothetical Protein	Uncharacterized	0	0	0	273463802337646	272331562042236	275575695037842	0	0	0	X
TVAG_151340	Amino Acid Transporter, Putative	Amino Acid Transmembrane Transport	0	0	239503803253174	238201656341553	0	239901447296143	0	0	0
TVAG_151500	Chmp1, Putative	Vacuolar Transport	0	248230361938477	250826148986816	280433826446533	268944644927979	265323143005371	0	0	0		X	X	X			X
TVAG_152520	Conserved Hypothetical Protein	Uncharacterized	0	0	0	220326805114746	219894008636475	232215366363525	0	0	0						X
TVAG_158830	60S Ribosomal Protein L35, Putative	Maturation Of Lsu-Rrna From Tricistronic Rrna Transcript	0	0	0	251463928222656	244702301025391	244405040740967	0	0	0
TVAG_159500	Conserved Hypothetical Protein	Dna Metabolic Process	245581836700439	0	0	250071868896484	251949787139893	248852996826172	0	0	0	X		X				X
TVAG_160900	O-Methyltransferase, Putative	Uncharacterized	0	0	0	0	231087684631348	231925582885742	0	0	0				X
TVAG_163490	Hypothetical Protein	Uncharacterized	257255420684814	244873237609863	247886543273926	244356803894043	239894523620605	248734264373779	0	0	0			X	X			X
TVAG_166100	Conserved Hypothetical Protein	Uncharacterized	0	0	228297386169434	25583251953125	247934246063232	248179244995117	0	0	0
TVAG_167320	Nucleoside Diphosphate Kinase, Putative	Nucleoside Diphosphate Phosphorylation	0	0	0	262494869232178	0	25857852935791	0	0	0			X	X
TVAG_172480	P67Phox Protein, Putative	Uncharacterized	23777660369873	0	238825969696045	240146961212158	240968379974365	241317901611328	0	0	0			X	X		X	X
TVAG_176390	Conserved Hypothetical Protein	Uncharacterized	0	0	0	232685661315918	0	219178333282471	0	0	0
TVAG_178030	Plasma Membrane Calcium-Transporting Atpase, Putative	Ion Transport	22991979598999	23231969833374	227463855743408	0	0	0	0	0	0	X		X				X
TVAG_178070	Tubulin-Specific Chaperone A, Putative	Protein Folding	251487598419189	0	248260955810547	261514339447021	256607685089111	256865100860596	0	0	0				X			X
TVAG_178460	Hypothetical Protein	Autophagy	0	0	225564422607422	226965732574463	22525447845459	0	0	0	0							X
TVAG_185340	Rab32, Putative	Intracellular Protein Transport	226573753356934	223612651824951	228877735137939	225086708068848	227626342773438	235292186737061	0	0	0							X
TVAG_186170	Conserved Hypothetical Protein	Uncharacterized	236356658935547	0	239597835540771	0	0	237010231018066	0	0	0	X						X
TVAG_190270	Conserved Hypothetical Protein	Dna Metabolic Process	0	225911273956299	224926738739014	222703075408936	0	0	0	0	0							X
TVAG_190280	60S Ribosomal Protein L13, Putative	Translation	0	0	0	0	246720638275146	247022399902344	0	0	0
TVAG_190490	Conserved Hypothetical Protein	Ubiquitin-Dependent Protein Catabolic Process	0	0	228739700317383	228151702880859	0	231257972717285	0	0	0
TVAG_193090	Hypothetical Protein	Protein Targeting To Vacuole	237551136016846	0	23434663772583	236186294555664	233003368377686	231763343811035	0	0	0							X
TVAG_200250	Conserved Hypothetical Protein	Uncharacterized	209297637939453	222535247802734	230592174530029	0	0	0	0	0	0						X	X
TVAG_204380	Protein Sey1, Putative	Endoplasmic Reticulum Membrane Fusion	230328826904297	239715843200684	231981601715088	0	0	0	0	0	0							X
TVAG_204390	Thioredoxin M(Mitochondrial)-Type, Putative	Uncharacterized	254589195251465	0	257237739562988	264557266235352	268943481445313	273428249359131	0	0	0				X			X
TVAG_205530	Conserved Hypothetical Protein	Intracellular Protein Transport	0	250646800994873	24572883605957	259322891235352	263433513641357	259570617675781	0	0	0			X	X			X
TVAG_208790	Conserved Hypothetical Protein	Uncharacterized	0	0	0	22737232208252	0	220907783508301	0	0	0							X
TVAG_209030;TVAG_493970;TVAG_164190	Tkl Family Protein Kinase	Protein Phosphorylation	231817722320557	0	0	232279815673828	0	213225116729736	0	0	0			X				X
TVAG_209200	Saposin, Putative	Lipid Metabolic Process	0	0	0	253705596923828	238432598114014	24320240020752	0	0	0				X		X
TVAG_210380	Heterogeneous Nuclear Ribonucleoprotein A1, Putative	Uncharacterized	0	0	0	249739055633545	238109798431396	241396179199219	0	0	0				X		X
TVAG_215070	Conserved Hypothetical Protein	Uncharacterized	0	0	0	219695129394531	219833927154541	220199146270752	0	0	0				X
TVAG_219770	Macrophage Migration Inhibitory Factor, Mif, Putative	Uncharacterized	0	0	250132064819336	256305656433105	251851043701172	267479114532471	0	0	0		X	X	X			X
TVAG_223560	Conserved Hypothetical Protein	Uncharacterized	0	0	0	26712797164917	250471019744873	249815044403076	0	0	0				X			X
TVAG_224490	Conserved Hypothetical Protein	Uncharacterized	23583251953125	247390270233154	245877780914307	231609573364258	0	229857921600342	0	0	232248954772949				X
TVAG_230400	Conserved Hypothetical Protein	Uncharacterized	0	0	0	297725830078125	286756286621094	277864360809326	0	0	0	X						X
TVAG_236630	Phosphatidylinositol Kinase, Putative	Phosphorylation	235639533996582	0	224473819732666	224589138031006	215760250091553	208248538970947	0	0	0							X
TVAG_237350	Fidipidine, Putative	Golgi To Plasma Membrane Transport	0	0	0	23013692855835	227257137298584	227589817047119	0	0	0				X			X
TVAG_243960	Conserved Hypothetical Protein	Uncharacterized	225499954223633	0	230260581970215	233920497894287	230914726257324	225993690490723	0	0	0	X						X
TVAG_248810	Glutathione Peroxidase, Putative	Response To Oxidative Stress	236078357696533	0	239920482635498	243260135650635	24944450378418	251270732879639	0	0	0				X			X
TVAG_250530	Conserved Hypothetical Protein	Uncharacterized	0	0	0	22686092376709	219757175445557	231888961791992	0	0	0				X
TVAG_252200;TVAG_145700;TVAG_484900;TVAG_453040	S-Adenosylmethionine Synthetase, Putative	S-Adenosylmethionine Biosynthetic Process	0	0	0	228159313201904	227403030395508	229388904571533	0	0	0				X
TVAG_253630	Heat Shock Protein, Putative	Ubiquitin-Dependent Erad Pathway	229877700805664	245096626281738	23678955078125	0	0	0	0	0	0				X		X	X
TVAG_254840;TVAG_014160	60S Ribosomal Protein L12, Putative	Translation	0	239095802307129	250187759399414	0	0	0	0	0	0
TVAG_255370	Conserved Hypothetical Protein	Vesicle Cytoskeletal Trafficking	0	0	224224472045898	229695129394531	0	219847145080566	0	0	0			X				X
TVAG_256820	Purine Nucleoside Phosphorylase, Putative	Uridine Catabolic Process	219038200378418	0	0	238988285064697	244909381866455	239015941619873	0	0	0				X
TVAG_260750	Conserved Hypothetical Protein	Uncharacterized	242571716308594	263503150939941	264369678497314	281621170043945	267505989074707	270288639068604	229521427154541	0	0	X		X	X			X
TVAG_263290	Clan Sc, Family S28, Unassigned Serine Peptidase	Proteolysis	232530498504639	0	231898918151855	241215515136719	242548656463623	246526679992676	0	0	0							X
TVAG_263760	60S Ribosomal Protein L18A, Putative	Translation	0	0	23791934967041	252624130249023	0	239357109069824	0	0	0			X	X
TVAG_269280	Conserved Hypothetical Protein	Uncharacterized	253019065856934	0	0	256591358184814	0	24633228302002	0	0	0							X
TVAG_271580	Sphingomyelin Phosphodiesterase, Putative	Uncharacterized	213154525756836	0	214633865356445	0	0	208644618988037	0	0	0	X					X	X
TVAG_276400	Cysteinyl-Trna Synthetase, Putative	Translation	235248031616211	0	227052688598633	23767391204834	235304107666016	230827121734619	0	0	0				X
TVAG_276930	Clan Sb, Family S8, Subtilisin-Like Serine Peptidase	Proteolysis	0	0	0	225720500946045	0	216009120941162	0	0	0							X
TVAG_277410	Thioredoxin, Putative	Uncharacterized	0	0	0	233409595489502	226812534332275	236045589447021	0	0	0				X		X
TVAG_286480	Conserved Hypothetical Protein	Uncharacterized	0	0	227935638427734	22047534942627	0	223240242004395	0	0	0				X
TVAG_286960	Family T1, Proteasome Beta Subunit, Threonine Peptidase	Proteasomal Protein Catabolic Process	225917892456055	0	232115898132324	228638763427734	22686840057373	228128032684326	0	0	0			X	X		X
TVAG_292580	Immunophilin, Putative	Protein Peptidyl-Prolyl Isomerization	240781421661377	246640014648438	254284782409668	0	0	0	0	0	0				X		X	X
TVAG_297000	Conserved Hypothetical Protein	Uncharacterized	22645902633667	0	0	220086402893066	0	216184043884277	0	0	0				X
TVAG_297260	Ubiquitin-Conjugating Enzyme E2, Putative	Protein Polyubiquitination	0	0	231111106872559	230167560577393	22648998260498	0	0	0	0				X			X
TVAG_301810	Conserved Hypothetical Protein	Protein Folding	235117149353027	246058597564697	240683345794678	0	0	0	0	0	0				X		X
TVAG_302460	Cysteine Desulfurylase, Putative	Uncharacterized	0	234501037597656	236363296508789	0	0	0	0	0	0							X
TVAG_307990	Conserved Hypothetical Protein	Uncharacterized	233646621704102	0	238972606658936	241689033508301	235955963134766	240444355010986	0	0	0	X						X
TVAG_308150	Conserved Hypothetical Protein	Lipid Metabolic Process	233071632385254	224490718841553	223178558349609	0	0	215958690643311	0	0	0							X
TVAG_308190	Ral, Putative	Signal Transduction	235735759735107	0	0	239254245758057	0	237955074310303	0	0	0							X
TVAG_317210	Dnaj/Hsp40, Putative	Protein Folding	225426940917969	231431102752686	235999145507813	258890190124512	246765365600586	248204097747803	0	0	220002040863037			X	X		X	X
TVAG_320300;TVAG_368730;TVAG_015270;TVAG_019470;TVAG_453170	Gtp-Binding Protein Rab2, Putative	Intracellular Protein Transport	237694110870361	0	234861583709717	243203773498535	241045360565186	242114849090576	0	0	0			X				X
TVAG_322950	Rho3, Putative	Small Gtpase Mediated Signal Transduction	234480876922607	0	236145915985107	0	236778812408447	236457042694092	0	0	231590328216553			X	X			X
TVAG_328110	Rab-18, Putative	Intracellular Protein Transport	231925582885742	0	0	229832191467285	0	233341541290283	0	0	0			X				X
TVAG_340390	Heat Shock Protein 70 (Hsp70)-4, Putative	Protein Folding	229682655334473	23759183883667	24938943862915	0	0	0	0	0	0	X			X		X
TVAG_348300	Conserved Hypothetical Protein	Phosphorylation	0	0	0	235420322418213	239057312011719	239936904907227	0	0	239173431396484				X
TVAG_349660	Conserved Hypothetical Protein	Uncharacterized	0	0	222085704803467	239511814117432	0	194029331207275	0	0	0							X
TVAG_351490	Conserved Hypothetical Protein	Uncharacterized	0	0	0	262972602844238	26230281829834	266142826080322	212794609069824	0	232049808502197
TVAG_355590	Nac1, Putative	Uncharacterized	233154792785645	0	228570938110352	0	244555702209473	245777893066406	0	0	0				X
TVAG_355610	Epsin 4/Enthoprotin, Putative	Endocytosis	0	0	0	226299877166748	0	218450222015381	0	0	0				X
TVAG_361420;TVAG_157610	Small Gtpase Rab, Putative	Uncharacterized	0	0	0	234144172668457	0	237915382385254	0	0	0			X
TVAG_365520	Glucosamine-6-Phosphate Isomerase, Putative	Carbohydrate Metabolic Process	231903743743896	245810699462891	239653434753418	0	0	0	0	0	0				X		X
TVAG_569810;TVAG_369140;TVAG_569800;TVAG_294220;TVAG_422410	Conserved Hypothetical Protein	Proteolysis	241517429351807	0	0	0	237470417022705	243914585113525	267218189239502	267858142852783	258446254730225				X			X
TVAG_369910	Conserved Hypothetical Protein	Uncharacterized	200020961761475	0	185174541473389	243344955444336	0	177801418304443	0	0	0				X			X
TVAG_371680	Cop9 Signalosome Complex Subunit, Putative	Proteasome-Mediated Ubiquitin-Dependent Protein Catabolic Process	231955947875977	236818542480469	23300895690918	242876415252686	234618892669678	237280616760254	240592842102051	0	0				X		X
TVAG_377780	Conserved Hypothetical Protein	Uncharacterized	0	256742210388184	248052349090576	0	0	0	0	0	0				X		X	X
TVAG_379780	Eukaryotic Translation Initiation Factor, Putative	Translational Initiation	0	0	0	221920166015625	0	218671035766602	0	0	0				X
TVAG_383590	Leucine-Rich Repeat Protein, Bspa Family	Uncharacterized	24221549987793	244620132446289	244221382141113	244813613891602	234563846588135	229095439910889	0	0	0				X
TVAG_392410	Clan Mh, Family M18, Aspartyl Aminopeptidase-L	Proteolysis	0	0	219904384613037	226998805999756	2252587890625	233342914581299	0	0	0				X
TVAG_399070	Clan Sc, Family S28, Unassigned Serine Peptidase	Proteolysis	233746452331543	0	241032562255859	235712642669678	242855262756348	240385036468506	0	0	0				X			X
TVAG_403310	Leucine-Rich Repeat Protein, Bspa Family	Uncharacterized	224218559265137	228656139373779	226200847625732	225680885314941	223954524993896	220833625793457	0	0	0							X
TVAG_403460;TVAG_040850	Clan Mg, Familly M24, Aminopeptidase P-Like Metallop	Uncharacterized	219297637939453	218637046813965	236048984527588	257690830230713	24149730682373	25559700012207	0	0	0			X	X
TVAG_403830	S-Adenosylmethionine Synthetase, Putative	S-Adenosylmethionine Biosynthetic Process	0	0	0	230054912567139	217743053436279	0	0	0	0				X
TVAG_413710	Uridine Cytidine Kinase I, Putative	Phosphorylation	0	0	0	217885932922363	225814590454102	226597938537598	23238618850708	0	232180805206299				X
TVAG_414060	Glucosamine-6-Phosphate Isomerase, Putative	Carbohydrate Metabolic Process	227515640258789	221603870391846	229473876953125	210188274383545	212892322540283	214232158660889	0	0	0				X
TVAG_414500	Conserved Hypothetical Protein	Dna Metabolic Process	0	0	231076679229736	233929653167725	23533145904541	239338207244873	0	0	0							X
TVAG_418970	Thioredoxin M(Mitochondrial)-Type, Putative	Uncharacterized	0	0	0	235067596435547	241772918701172	244626388549805	0	0	0		X	X	X		X
TVAG_419390	Tkl Family Protein Kinase	Protein Phosphorylation	0	0	210269527435303	240155487060547	237404689788818	242970504760742	0	0	0							X
TVAG_420480	Conserved Hypothetical Protein	Uncharacterized	0	0	229495086669922	251066932678223	252014617919922	265829067230225	0	233694629669189	228205757141113			X			X	X
TVAG_430670	Adenosine Deaminase, Putative	Adenosine Catabolic Process	2263916015625	0	21456335067749	221855888366699	238474712371826	235525074005127	232795181274414	227843856811523	236693630218506			X	X
TVAG_433790	Clan Mh, Family M20, Peptidase T-Like Metallopeptidase	Uncharacterized	203252048492432	0	199687404632568	1945285987854	262881870269775	263747940063477	0	0	0				X
TVAG_436530	Na+ Driven Multidrug Efflux Pump, Putative	Xenobiotic Transport	0	251539478302002	249451656341553	256798686981201	262682628631592	25580005645752	0	0	0
TVAG_439410	M Protein, Serotype 2.1 Precursor, Putative	Uncharacterized	0	0	215228176116943	232089443206787	221550216674805	213551464080811	0	0	0				X			X
TVAG_440200	Conserved Hypothetical Protein	Uncharacterized	258613834381104	240208969116211	264764404296875	215469379425049	0	220000667572021	0	0	0	X			X			X
TVAG_446780	Short-Chain Dehydrogenase, Putative	Uncharacterized	0	0	232591114044189	243492183685303	22881420135498	233768978118896	0	0	0				X
TVAG_449870	Snare Proteins, Putative	Uncharacterized	226257572174072	0	226495456695557	228293704986572	226158256530762	227088298797607	0	0	0				X			X
TVAG_457250	Group Ii Pyridoxal-5-Phosphate Decarboxylase, Putative	Glutamate Metabolic Process	0	0	225706844329834	237948131561279	229661540985107	23564302444458	0	0	0
TVAG_459000	Serine/Threonine Protein Phosphatase 2A Re	Protein Dephosphorylation	0	0	221967658996582	226109924316406	21832483291626	231915035247803	0	0	0				X
TVAG_459200	Conserved Hypothetical Protein	Uncharacterized	250980434417725	251299457550049	250633220672607	0	0	0	0	0	0							X
TVAG_460770	Conserved Hypothetical Protein	Uncharacterized	0	0	245604000091553	239793682098389	0	250837116241455	0	0	0	X
TVAG_463890	Conserved Hypothetical Protein	Uncharacterized	0	0	0	232407150268555	0	240617580413818	0	0	0				X			X
TVAG_476140	Peptidylprolyl Isomerase, Putative	Protein Peptidyl-Prolyl Isomerization	0	255296649932861	260984840393066	271722640991211	271126708984375	268296566009521	0	0	0			X	X		X	X
TVAG_477180	Clan Ma, Family M3, Oligopeptidase A-Like Metallopepti	Proteolysis	202689933776855	207133903503418	234635105133057	262656364440918	256161918640137	262257671356201	201078910827637	0	199221019744873				X		X
TVAG_482230	Conserved Hypothetical Protein	Uncharacterized	0	0	0	218883686065674	229149551391602	229779891967773	0	0	0							X
TVAG_484570	Alkyl Hydroperoxide Reductase, Subunit C, Putative	Response To Oxidative Stress	245874919891357	0	0	0	249793682098389	247139778137207	0	0	0			X	X
TVAG_486100	Conserved Hypothetical Protein	Uncharacterized	0	0	0	228249702453613	0	230302410125732	0	0	0
TVAG_486850	Conserved Hypothetical Protein	Uncharacterized	0	0	0	241188621520996	234443016052246	218626461029053	0	0	0							X
TVAG_492760	Conserved Hypothetical Protein	Transmembrane Transport	254231338500977	248186550140381	0	244704170227051	24565523147583	237156543731689	0	0	0							X
TVAG_494990	Conserved Hypothetical Protein	Uncharacterized	0	0	221089763641357	247819671630859	0	217396659851074	0	0	0	X
TVAG_495090	Conserved Hypothetical Protein	Proton Transmembrane Transport	261751232147217	0	269211616516113	288541240692139	275558166503906	280174922943115	0	0	0				X			X
TVAG_509310;TVAG_535840;TVAG_438670;TVAG_123370	Conserved Hypothetical Protein	Uncharacterized	227703590393066	24415641784668	246422920227051	0	0	0	0	0	0	X			X
TVAG_514020	Conserved Hypothetical Protein	Uncharacterized	0	0	0	0	235791130065918	218700428009033	0	0	0							X
TVAG_533910	Rheb, Putative	Signal Transduction	230047206878662	0	226302089691162	228543376922607	233451633453369	235938873291016	0	0	0							X
TVAG_607280	Leucine-Rich Repeat Protein, Bspa Family	Uncharacterized	0	0	227488651275635	222924385070801	0	219714794158936	0	0	0							X
TVAG_RG_DS113633_7	Gene_Product=Conserved Hypothetical Protein	Uncharacterized	234678707122803	0	226605548858643	224596652984619	223599262237549	230318737030029	0	0	0
TVAG_000750	Prefoldin Subunit, Putative	Protein Folding	231824989318848	0	0	245111713409424	0	235954818725586	0	0	0				X
TVAG_001570	Alcohol Dehydrogenase, Putative	Uncharacterized	0	0	0	211198425292969	214656295776367	0	0	0	0
TVAG_001610	Plasma Membrane Calcium-Transporting Atpase, Putative	Ion Transport	0	229178524017334	227910804748535	0	0	0	0	0	0							X
TVAG_001840	Dexras1, Putative	Signal Transduction	0	0	0	0	243830432891846	248277912139893	0	0	0			X				X
TVAG_002900;TVAG_292610	Conserved Hypothetical Protein	Uncharacterized	0	0	0	224299468994141	231978607177734	22727481842041	0	0	0				X			X
TVAG_004030	Conserved Hypothetical Protein	Uncharacterized	0	0	0	240049610137939	241665306091309	240624179840088	0	0	0							X
TVAG_004670	Conserved Hypothetical Protein	Uncharacterized	0	0	0	240083847045898	251708908081055	243761692047119	0	0	241446056365967	X		X
TVAG_005970	Conserved Hypothetical Protein	Uncharacterized	0	0	0	226264038085938	0	225518035888672	0	0	0
TVAG_010770	Leucine-Rich Repeat Protein, Bspa Family	Uncharacterized	0	0	0	23204891204834	227509708404541	244319877624512	0	0	0							X
TVAG_010780	Beta-Hexosaminidase B, Putative	Carbohydrate Metabolic Process	0	0	221905689239502	231112861633301	234270076751709	243868637084961	0	0	0							X
TVAG_012540	Conserved Hypothetical Protein	Endoplasmic Reticulum Unfolded Protein Response	0	237697143554688	230971908569336	0	0	0	0	0	0						X	X
TVAG_013380;TVAG_496760	L-Allo-Threonine Aldolase, Putative	Cellular Amino Acid Metabolic Process	0	0	0	24005989074707	230849857330322	237311744689941	0	0	0				X
TVAG_013450	Periplasmic Beta-Glucosidase Precursor, Putative	Carbohydrate Metabolic Process	0	0	0	232361087799072	0	221995830535889	0	0	0							X
TVAG_013700	Conserved Hypothetical Protein	Uncharacterized	0	0	0	222536125183105	0	218086452484131	0	0	0				X
TVAG_013720	Conserved Hypothetical Protein	Uncharacterized	232915115356445	235319576263428	237844657897949	224680938720703	0	212945156097412	0	0	0
TVAG_014140	N-Linked Oligosaccharide Processing, Putative	N-Glycan Processing	229575901031494	249310283660889	24435998916626	0	0	0	0	0	0				X			X
TVAG_015860	Tetratricopeptide Repeat Protein, Tpr, Putative	Protein Folding	0	0	0	257199935913086	251196136474609	253866329193115	0	0	0				X
TVAG_018970	Methionine Sulfoxide Reductase, Putative	Cellular Response To Oxidative Stress	0	0	0	221607265472412	22591926574707	224878253936768	0	0	0				X			X
TVAG_518730;TVAG_602550;TVAG_019020	Conserved Hypothetical Protein	Uncharacterized	0	0	0	232230987548828	22566068649292	227789039611816	0	0	0
TVAG_019220	Conserved Hypothetical Protein	Uncharacterized	0	0	0	227306976318359	22785623550415	223829784393311	0	0	0				X			X
TVAG_021230	N-Myristoyl Transferase, Putative	N-Terminal Protein Myristoylation	211215515136719	0	214257278442383	0	21258508682251	229470310211182	0	0	0				X
TVAG_021390	Aaa Atpase, Putative	Vacuole Organization	0	0	0	0	236769142150879	227459754943848	0	0	0							X
TVAG_022920;TVAG_401570;TVAG_107580;TVAG_402180;TVAG_189800;TVAG_402330;TVAG_280880;TVAG_433980;TVAG_150010;TVAG_341300;TVAG_005740;TVAG_443520;TVAG_100540;TVAG_118930;TVAG_455730;TVAG_187900;TVAG_369490;TVAG_299470;TVAG_391260;TVAG_226380;TVAG_235140;TVAG_202870;TVAG_305800	Vps9-Ankyrin Repeat-Containing Protein, Putative	Uncharacterized	0	0	0	239986057281494	0	226888484954834	0	0	0				X
TVAG_023320	Clan Sc, Family S28, Unassigned Serine Peptidase	Proteolysis	0	0	234104118347168	246793327331543	239985179901123	235846290588379	0	0	0							X
TVAG_023570	Tkl Family Protein Kinase	Protein Phosphorylation	0	0	0	196829986572266	0	23657527923584	0	0	0
TVAG_024800	Protein Transport Protein Sec7, Putative	Regulation Of Arf Protein Signal Transduction	0	0	0	233634586334229	0	23528980255127	0	0	0				X			X
TVAG_024980	Ubiquitin Fusion Degradaton Protein, Putative	Ubiquitin-Dependent Protein Catabolic Process	0	0	0	237721328735352	0	225680656433105	0	0	0				X			X
TVAG_025980;TVAG_025910	Glutamate Dehydrogenase, Putative	Uncharacterized	0	0	0	229851665496826	0	235425052642822	241547584533691	0	23498384475708			X
TVAG_026220	Acid Phosphatase, Putative	Dephosphorylation	0	0	225588722229004	233230609893799	0	228556880950928	0	0	0
TVAG_026730	Microsomal Stress 70 Protein Atpase Core Precursor,	Cellular Response To Unfolded Protein	0	0	0	237424221038818	0	212129993438721	0	0	0		X					X
TVAG_026740	Branched-Chain Amino Acid Aminotransferase, Putative	Cellular Amino Acid Biosynthetic Process	0	0	0	235639533996582	236836757659912	234374599456787	0	0	0
TVAG_027620	Phosphoglucomutase, Putative	Carbohydrate Metabolic Process	229736347198486	0	0	0	224177417755127	23056526184082	0	0	0				X
TVAG_029040	Guanine Deaminase, Putative	Guanine Catabolic Process	0	0	0	24777811050415	233955841064453	243878498077393	0	0	0
TVAG_031860	Conserved Hypothetical Protein	Uncharacterized	223430500030518	0	241509685516357	258335208892822	239304866790771	0	0	0	0							X
TVAG_033000	Myosin Heavy Chain, Putative	Uncharacterized	0	0	0	23724006652832	23293758392334	236086254119873	0	0	0			X	X
TVAG_033610	Conserved Hypothetical Protein	Uncharacterized	0	255815582275391	249369239807129	0	0	0	0	0	0						X
TVAG_035370;TVAG_397310	Rab23, Putative	Intracellular Protein Transport	0	0	0	235148468017578	0	233996295928955	0	0	0				X			X
TVAG_037690;TVAG_472700;TVAG_037470;TVAG_472620;TVAG_009400;TVAG_140220;TVAG_140210;TVAG_009390	Ankyrin Repeat-Containing Protein, Putative	Uncharacterized	0	0	0	235463962554932	0	221424865722656	0	0	0							X
TVAG_038250	Rab12, Putative	Intracellular Protein Transport	0	0	0	223278656005859	221799812316895	2217724609375	0	0	0							X
TVAG_038530	Ornithine Carbamoyltransferase, Putative	Cellular Amino Acid Metabolic Process	0	0	0	22558521270752	257117214202881	267301368713379	220335540771484	21783727645874	223309860229492			X	X
TVAG_039980	Superoxide Dismutase, Putative	Superoxide Metabolic Process	235267143249512	0	232741241455078	236383209228516	225189342498779	240057315826416	0	0	0				X
TVAG_040310	Conserved Hypothetical Protein	Uncharacterized	0	0	0	232917919158936	22031436920166	222368965148926	0	0	0				X
TVAG_363390;TVAG_043170	Fructose-Bisphosphate Aldolase, Putative	Uncharacterized	0	0	0	264367446899414	0	270165901184082	0	0	0
TVAG_043550	Proline Synthetase Associated Protein, Putative	Uncharacterized	0	0	0	228686866760254	233693294525146	230022850036621	0	0	0				X
TVAG_044490	Rabx18 Protein, Putative	Uncharacterized	0	0	0	218117046356201	208544521331787	0	0	0	0							X
TVAG_044510;TVAG_397610;TVAG_246820	Heat Shock Protein 70 (Hsp70)-4, Putative	Cellular Response To Unfolded Protein	0	0	0	0	241927223205566	246858139038086	0	0	0	X	X		X		X
TVAG_044970	Dihydrodipicolinate Synthase, Putative	Carbohydrate Metabolic Process	0	230887584686279	230562267303467	230244026184082	234612636566162	235099029541016	0	0	0
TVAG_045320	Conserved Hypothetical Protein	Uncharacterized	0	0	0	238954124450684	0	20859920501709	0	0	0	X			X
TVAG_046340	Conserved Hypothetical Protein	Uncharacterized	0	0	0	213652763366699	0	215830230712891	0	0	0	X			X
TVAG_047090	Conserved Hypothetical Protein	Uncharacterized	0	0	0	219713039398193	0	226367511749268	0	0	0
TVAG_047650	Mgm1, Putative	Uncharacterized	0	0	219771862030029	223146514892578	0	219164867401123	0	0	0				X			X
TVAG_053720	Conserved Hypothetical Protein	Uncharacterized	219471740722656	0	228662357330322	232306079864502	0	224582386016846	0	0	0				X
TVAG_054170	Conserved Hypothetical Protein	Cell Migration	0	0	0	241644592285156	241754665374756	22565279006958	0	0	0							X
TVAG_055280	Signal Recognition Particle Receptor Subunit Beta, Pu	Protein Targeting To Er	0	246663856506348	239050884246826	0	0	0	0	0	0							X
TVAG_056000	Atpase, Class Vi, Type 11C, Putative	Phospholipid Transport	20362174987793	208015975952148	211322612762451	251508140563965	242835502624512	24025297164917	0	0	0							X
TVAG_056870	Clathrin Coat Assembly Protein Ap19, Putative	Intracellular Protein Transport	0	0	0	225430011749268	0	214996013641357	0	0	0
TVAG_057110	Clan Sc, Family S33, Methylesterase-Like Serine Peptida	Cellular Lipid Metabolic Process	0	221391487121582	221499462127686	0	0	0	0	0	0							X
TVAG_059110	Conserved Hypothetical Protein	Ubiquitin-Dependent Protein Catabolic Process	0	0	0	237822685241699	218321361541748	226489543914795	0	0	0
TVAG_059250	Dolichyl-Diphosphooligosaccharide--Prote	Protein Glycosylation	243253288269043	254423713684082	252772483825684	0	0	0	0	0	0							X
TVAG_062440	Conserved Hypothetical Protein	Uncharacterized	0	0	0	231024074554443	251219062805176	246210346221924	0	0	0
TVAG_062510;TVAG_035360	Clusterin-Associated Protein, Putative	Cell Projection Organization	0	0	0	219896087646484	0	214813861846924	0	0	0
TVAG_062540	Tkl Family Protein Kinase	Protein Phosphorylation	0	0	0	22267936706543	213173313140869	0	0	0	0							X
TVAG_063330	Conserved Hypothetical Protein	Proteolysis	221731948852539	0	232135791778564	232201919555664	230039825439453	239667530059814	0	0	0				X
TVAG_064190	Cmgc Family Protein Kinase	Protein Phosphorylation	0	0	0	221191139221191	0	218945980072021	0	0	0
TVAG_064280	Conserved Hypothetical Protein	Uncharacterized	0	0	0	23408727645874	0	227416820526123	0	0	0				X
TVAG_064460;TVAG_376030	Na+ Driven Multidrug Efflux Pump, Putative	Xenobiotic Transport	0	0	0	226360645294189	0	222595710754395	0	0	0
TVAG_066810	4-Nitrophenylphosphatase, Putative	Uncharacterized	0	0	0	241065349578857	0	241245517730713	0	0	0				X
TVAG_066900	Ubiquitin-Conjugating Enzyme E2-25Kd, Putative	Protein Neddylation	227575168609619	0	223768177032471	226796855926514	0	223034610748291	0	0	0				X
TVAG_066950	Dnaj/Hsp40, Putative	Protein Folding	0	0	0	229268360137939	226952781677246	229549312591553	0	0	0				X			X
TVAG_069270	Cmgc Family Protein Kinase	Protein Phosphorylation	0	0	221966762542725	220509910583496	222425193786621	22351053237915	0	0	0							X
TVAG_071630	Clan Mh, Family M20, Peptidase T-Like Metallopeptidase	Proteolysis	224523181915283	0	0	229319114685059	222961978912354	0	0	0	0
TVAG_071990	Conserved Hypothetical Protein	Uncharacterized	0	0	0	224774131774902	221959247589111	235980987548828	0	0	0
TVAG_072100	Glutamate Dehydrogenase, Putative	Cellular Amino Acid Metabolic Process	0	0	0	237847652435303	240183525085449	268010692596436	0	0	0
TVAG_076670	Small Gtpase Rab, Putative	Intracellular Protein Transport	0	0	0	229505405426025	228831939697266	231540489196777	0	0	0							X
TVAG_077880	Conserved Hypothetical Protein	Uncharacterized	0	0	0	234638862609863	0	207623920440674	0	0	0				X			X
TVAG_078710	Conserved Hypothetical Protein	Uncharacterized	0	0	0	0	235608081817627	232192916870117	0	0	0
TVAG_080400	Rabx31 Protein, Putative	Intracellular Protein Transport	0	0	217787628173828	232140235900879	221894550323486	226902980804443	0	0	0							X
TVAG_081590	Rab5B, Putative	Intracellular Protein Transport	0	0	0	238755836486816	231815605163574	230952434539795	0	0	0							X
TVAG_083280	Hypothetical Protein	Uncharacterized	0	0	0	229071445465088	231794662475586	235645351409912	0	0	0							X
TVAG_083350	Conserved Hypothetical Protein	Uncharacterized	0	0	0	229647979736328	218163623809814	0	0	0	0
TVAG_083540	Ebna2 Binding Protein P100, Putative	Mrna Catabolic Process	223763675689697	0	217025661468506	224139785766602	0	221421451568604	0	0	0				X
TVAG_084710	Prefoldin Subunit, Putative	Protein Folding	0	0	0	221403045654297	0	224286193847656	0	0	0				X
TVAG_085990	Basic Proline-Rich Protein P	Uncharacterized	0	0	0	228296222686768	0	217394599914551	0	0	0
TVAG_088050	Chaperonin, Putative	Protein Folding	0	261713676452637	253444862365723	0	0	0	0	0	0	X			X
TVAG_088220	Aspartate Aminotransferase, Putative	Biosynthetic Process	210574188232422	0	223746452331543	0	0	0	0	0	0	X					X
TVAG_090380;TVAG_461410	Breast Cancer Suppressor Candidate 1,Bcsc-1, Putative	Uncharacterized	0	0	0	226927680969238	220012702941895	232614097595215	0	0	0				X
TVAG_091450	Conserved Hypothetical Protein	Uncharacterized	0	0	0	24255443572998	0	229800834655762	0	0	0							X
TVAG_091880;TVAG_091830;TVAG_091820;TVAG_031050;TVAG_031060;TVAG_091860;TVAG_091870	Modulator Of Drug Activity B, Putative	Uncharacterized	0	0	0	249061889648438	25477352142334	254742908477783	0	0	0
TVAG_486840;TVAG_416880;TVAG_193510;TVAG_092170;TVAG_391850	Preprotein Translocase Secy Subunit, Putative	Srp-Dependent Cotranslational Protein Targeting To Membrane, Translocation	243929004669189	254086303710938	248991527557373	0	0	0	0	0	0						X
TVAG_092740	Small Gtpase Rabi, Putative	Intracellular Protein Transport	0	0	0	214695110321045	0	217149410247803	0	0	0							X
TVAG_093470	Hypothetical Protein	Uncharacterized	0	0	225042152404785	232731266021729	0	226440315246582	0	0	0				X
TVAG_093940	Conserved Hypothetical Protein	Carbohydrate Metabolic Process	0	0	0	228741588592529	231057186126709	216874389648438	0	0	0							X
TVAG_094110	Lim Domain, Putative	Uncharacterized	0	0	241259708404541	265959091186523	247021865844727	245692367553711	242781715393066	0	0			X				X
TVAG_094810	Conserved Hypothetical Protein	Uncharacterized	0	0	0	227020168304443	232359771728516	244463844299316	0	0	0				X			X
TVAG_095410	Conserved Hypothetical Protein	Uncharacterized	0	0	0	236257801055908	24643835067749	247313289642334	0	0	229236488342285							X
TVAG_096320	Comm Domain-Containing Protein, Putative	Uncharacterized	0	0	0	0	214673233032227	213673038482666	0	0	0				X
TVAG_097610	Conserved Hypothetical Protein	Uncharacterized	0	0	226581382751465	235153274536133	0	227099666595459	0	0	0				X
TVAG_097660	Ubiquilin, Putative	Ubiquitin-Dependent Protein Catabolic Process	0	0	0	247154445648193	23928409576416	242987995147705	0	0	0			X	X
TVAG_097930	Leucine-Rich Repeat Protein, Bspa Family	Uncharacterized	0	0	200537776947021	233397369384766	227188339233398	225262126922607	0	0	0							X
TVAG_099160	Conserved Hypothetical Protein	Uncharacterized	0	0	0	0	248537654876709	250121841430664	0	0	0
TVAG_099550	Conserved Hypothetical Protein	Uncharacterized	0	0	0	216834182739258	224346885681152	23474817276001	0	0	0
TVAG_100140	Protein Sey1, Putative	Uncharacterized	0	2316090965271	234227809906006	0	0	0	0	0	0							X
TVAG_100720	Conserved Hypothetical Protein	Uncharacterized	0	0	0	246432838439941	233937511444092	244656295776367	0	0	0				X
TVAG_101440	Conserved Hypothetical Protein	Cell Migration	0	0	0	234626388549805	231768817901611	219132022857666	0	0	0							X
TVAG_102160	Aldo-Keto Reductase, Putative	Uncharacterized	225426940917969	0	232357730865479	239256954193115	235494556427002	232901058197021	0	0	0				X
TVAG_102390;TVAG_518540	Utp-Glucose-1-Phosphate Uridylyltransferase, Putative	Glycogen Metabolic Process	0	0	0	0	221878242492676	218825588226318	0	0	0				X
TVAG_102400	Conserved Hypothetical Protein	Uncharacterized	0	0	0	225082836151123	225568866729736	233277282714844	0	0	0							X
TVAG_102440	Conserved Hypothetical Protein	Uncharacterized	247006530761719	251189804077148	250794048309326	0	0	0	0	0	0							X
TVAG_103200	Wd-Repeat Protein, Putative	Autophagosome Assembly	0	0	0	22647066116333	0	226996688842773	0	0	0
TVAG_104450	Ring Finger, Putative	Ubiquitin-Dependent Protein Catabolic Process	0	0	0	227645797729492	0	23159725189209	0	0	0				X
TVAG_104680	Conserved Hypothetical Protein	Uncharacterized	268490009307861	0	0	258529567718506	0	210018196105957	2253782081604	0	229945545196533	X		X			X	X
TVAG_104710;TVAG_038190;TVAG_470600	Rabx3 Protein, Putative	Intracellular Protein Transport	22240104675293	226090316772461	229501857757568	225898494720459	227331409454346	223866386413574	0	0	0			X	X		X	X
TVAG_106550	Leucine-Rich Repeat Protein, Bspa Family	Uncharacterized	0	0	0	22289514541626	0	216561317443848	0	0	0							X
TVAG_108270	Conserved Hypothetical Protein	Uncharacterized	0	0	0	231348476409912	238842754364014	231154365539551	0	0	0				X
TVAG_108510	Vacuolar Sorting Protein Vps29, Putative	Intracellular Protein Transport	0	0	0	232916526794434	0	224444522857666	0	0	0			X	X			X
TVAG_109890	Hypothetical Protein	Uncharacterized	0	0	221714248657227	215582885742188	219420986175537	0	0	0	0
TVAG_110300	Conserved Hypothetical Protein	Uncharacterized	0	0	0	266249160766602	23307580947876	205805854797363	0	0	0	X
TVAG_110950	Polyadenylate-Binding Protein, Putative	Uncharacterized	22350622177124	0	216340484619141	232305641174316	232431735992432	23030948638916	0	0	0				X
TVAG_112500	Alpha-Amylase, Putative	Carbohydrate Metabolic Process	0	0	0	22192497253418	230903091430664	229793338775635	0	0	0				X
TVAG_112820	D-Aminoacylase, Putative	Uncharacterized	0	0	0	226955757141113	234245758056641	230150547027588	0	0	0
TVAG_113230	Calpain, Putative	Proteolysis	0	0	0	226425342559814	238067588806152	237458114624023	0	0	0			X				X
TVAG_113320	Hypothetical Protein	Uncharacterized	238981838226318	0	228267936706543	222904987335205	0	0	0	0	0							X
TVAG_114410	Conserved Hypothetical Protein	Dna Metabolic Process	225197257995605	232628440856934	230056629180908	235677871704102	231556701660156	222694225311279	0	0	0							X
TVAG_114450	Sphingomyelinase C 2 Precursor, Putative	Nucleic Acid Phosphodiester Bond Hydrolysis	0	230493297576904	233297824859619	0	0	0	0	0	0
TVAG_116720	Tkl Family Protein Kinase	Protein Phosphorylation	0	0	0	224081325531006	0	220141696929932	0	0	0							X
TVAG_117090	Conserved Hypothetical Protein	Uncharacterized	0	228110980987549	233318328857422	0	0	0	0	0	0							X
TVAG_118240	Conserved Hypothetical Protein	Uncharacterized	0	0	0	22975227355957	238335456848145	0	0	0	0				X
TVAG_119410	Conserved Hypothetical Protein	Uncharacterized	0	0	0	225714263916016	0	226830539703369	0	0	0
TVAG_119450;TVAG_221130	Conserved Hypothetical Protein	Uncharacterized	0	0	243869953155518	23910587310791	250801773071289	243897533416748	0	0	0				X
TVAG_119500	Thioredoxin, Putative	Uncharacterized	0	0	0	219776744842529	0	218960037231445	0	0	0				X
TVAG_120360	Conserved Hypothetical Protein	Deoxyribonucleoside Monophosphate Biosynthetic Process	229273433685303	0	0	222784690856934	236798152923584	236750831604004	0	0	0			X	X			X
TVAG_120980	40S Ribosomal Protein S12, Putative	Translation	0	0	0	242416896820068	0	24471471786499	0	0	0			X	X
TVAG_121740	Rab5, Putative	Intracellular Protein Transport	0	0	0	218056564331055	0	21841495513916	0	0	0				X			X
TVAG_122020	Calreticulin, Putative	Protein Folding	229876670837402	233315601348877	225020561218262	0	0	0	0	0	0				X		X	X
TVAG_123260	Aldose-1-Epimerase, Putative	Carbohydrate Metabolic Process	0	0	0	232705631256104	22876802444458	226001415252686	0	0	0				X
TVAG_123520	Conserved Hypothetical Protein	Uncharacterized	218502216339111	0	223602733612061	0	0	216036777496338	0	0	0							X
TVAG_128760;TVAG_439800	Gtpase_Rho, Putative	Small Gtpase Mediated Signal Transduction	0	0	230289096832275	226669616699219	235581245422363	233623886108398	0	0	0				X
TVAG_131260	Conserved Hypothetical Protein	Uncharacterized	0	0	0	2353883934021	0	225762329101563	0	0	0				X
TVAG_131910	Leucine-Rich Repeat Protein, Bspa Family	Uncharacterized	0	0	0	217620677947998	0	214645328521729	0	0	0	X
TVAG_131950	Leucine-Rich Repeat Protein, Bspa Family	Uncharacterized	0	0	0	22606164932251	0	2218869972229	0	0	0	X						X
TVAG_133890	Carboxypeptidase Regulatory Region-Containing Pro	Uncharacterized	0	226787414550781	238378810882568	0	0	0	0	0	0							X
TVAG_134260	Thioredoxin, Putative	Uncharacterized	0	0	0	0	23269136428833	233473281860352	0	0	0				X
TVAG_134300	Conserved Hypothetical Protein	Uncharacterized	0	0	0	219628219604492	0	224657306671143	0	0	0			X	X
TVAG_136250	Vacuolar Atp Synthase Proteolipid Subunit, Putative	Ion Transport	0	0	0	24307373046875	239199810028076	24675407409668	0	0	0	X		X				X
TVAG_137170	Conserved Hypothetical Protein	Uncharacterized	0	0	218573780059814	235917205810547	0	229588642120361	0	0	0				X
TVAG_137250;TVAG_213730	Heat Shock Protein 70 (Hsp70)-4, Putative	Cellular Response To Unfolded Protein	0	0	0	234492225646973	0	242662086486816	0	0	0
TVAG_139050	Conserved Hypothetical Protein	Translational Initiation	0	0	0	0	230560455322266	230054912567139	0	0	0				X
TVAG_139270	Rab10, Putative	Intracellular Protein Transport	0	0	0	22085729598999	217545032501221	221678161621094	0	0	0							X
TVAG_139310	Protein Phosphatase, Putative	Protein Dephosphorylation	0	0	0	0	205025177001953	219928607940674	0	0	0							X
TVAG_139670	Amino Acid Transporter, Putative	Amino Acid Transmembrane Transport	0	0	0	245646514892578	247028732299805	242219924926758	0	0	0
TVAG_140980	Heat Shock Protein 70 (Hsp70)-Interacting Protein, Pu	Post-Translational Protein Targeting To Endoplasmic Reticulum Membrane	0	0	0	237841663360596	221992244720459	228794956207275	0	0	0				X			X
TVAG_146900	Adaptin, Alpha/Gamma/Epsilon, Putative	Intracellular Protein Transport	0	0	228589725494385	221926784515381	0	21688591003418	0	0	0				X
TVAG_148900	Conserved Hypothetical Protein	Uncharacterized	237141876220703	0	23543212890625	263950595855713	256993026733398	274009666442871	0	0	0				X			X
TVAG_150040;TVAG_358780	Conserved Hypothetical Protein	Uncharacterized	224557075500488	0	242710628509521	0	0	214287967681885	0	0	0				X			X
TVAG_150220	Conserved Hypothetical Protein	Carbohydrate Metabolic Process	0	0	0	237073574066162	0	24311674118042	0	0	0
TVAG_150990	Conserved Hypothetical Protein	Uncharacterized	0	0	0	232320442199707	0	234483394622803	0	0	0
TVAG_154750;TVAG_432360	D-3-Phosphoglycerate Dehydrogenase, Putative	Uncharacterized	219704265594482	214514617919922	224492225646973	250266075134277	258179969787598	26791166305542	258818511962891	252599391937256	264330081939697		X	X	X		X
TVAG_154810	Conserved Hypothetical Protein	Uncharacterized	0	0	0	256656551361084	251549911499023	250299797058105	0	0	0
TVAG_157860	Conserved Hypothetical Protein	Uncharacterized	0	0	204631366729736	221892738342285	221988945007324	236765899658203	0	0	0
TVAG_158280	Ribulose-5-Phosphate-3-Epimerase, Putative	Carbohydrate Metabolic Process	225492191314697	0	223431854248047	252298240661621	249974422454834	260088748931885	0	0	0				X			X
TVAG_160010	Clan Ma, Family M8, Leishmanolysin-Like Metallopeptidase	Proteolysis	0	0	223387584686279	221456317901611	23152006149292	222924098968506	0	0	0							X
TVAG_160200	Conserved Hypothetical Protein	Uncharacterized	0	0	0	24611047744751	0	229783744812012	0	0	0
TVAG_161010	Clan S-, Family S54, Rhomboid-Like Serine Peptidase	Proteolysis	0	0	0	236523933410645	234996013641357	236873111724854	0	0	0
TVAG_161120	Conserved Hypothetical Protein	Uncharacterized	0	261747035980225	253386840820313	0	0	0	0	0	0				X
TVAG_161300	Iron Superoxide Dismutase A, Putative	Superoxide Metabolic Process	0	0	0	234724636077881	0	239092140197754	0	0	0				X
TVAG_163200;TVAG_163190	Conserved Hypothetical Protein	Uncharacterized	0	0	0	249548683166504	243084831237793	251202850341797	0	0	0				X
TVAG_164690	Calcium Binding Protein, Putative	Uncharacterized	0	0	0	0	228723182678223	230475177764893	0	0	0				X
TVAG_164900	Heat Shock Protein 70 (Hsp70)-4, Putative	Ubiquitin-Dependent Erad Pathway	242434349060059	246461429595947	238503360748291	0	0	0	0	0	0				X		X
TVAG_166850	Conserved Hypothetical Protein	Uncharacterized	0	223639659881592	21870719909668	0	0	0	242951602935791	245073051452637	226789989471436	X			X
TVAG_167790	Conserved Hypothetical Protein	Uncharacterized	0	0	0	0	253373565673828	233223743438721	0	0	0	X
TVAG_168600	Leucine-Rich Transmembrane Proteins, Putative	Uncharacterized	0	0	0	226473293304443	0	226355113983154	0	0	0							X
TVAG_170540	Mutt/Nudix Hydrolase, Putative	Nadh Metabolic Process	0	0	0	238600330352783	0	223368530273438	0	0	0
TVAG_173640	Cation-Transporting Atpase, Putative	Cation Transport	221099643707275	241448383331299	24632396697998	0	0	0	0	0	0							X
TVAG_174100	Calnexin, Putative	Protein Folding	228160877227783	240547389984131	240689086914063	0	0	0	0	0	0							X
TVAG_174710	Conserved Hypothetical Protein	Uncharacterized	0	0	0	226184043884277	217538909912109	0	0	0	0				X
TVAG_174880	Low Molecular Weight Protein Tyrosine Phosphatase, Pu	Protein Dephosphorylation	0	0	0	229850616455078	231383209228516	0	0	0	0							X
TVAG_177370	Vacuolar Protein Sorting 26, Vps26, Putative	Intracellular Protein Transport	0	0	0	233196201324463	0	226660079956055	0	0	0
TVAG_178620	Conserved Hypothetical Protein	Uncharacterized	0	0	0	229333343505859	0	226676750183105	0	0	0				X			X
TVAG_180550	Uridine Cytidine Kinase I, Putative	Phosphorylation	0	0	0	0	237791652679443	229395179748535	241501178741455	247233829498291	251102027893066				X			X
TVAG_181310	Clan Ca, Family C1, Cathepsin H-Like Cysteine Peptidase	Proteolysis	0	0	0	0	24375904083252	239811115264893	0	0	0
TVAG_182370	Chaperonin Containing T-Complex Protein	Protein Folding	0	0	224120922088623	0	222649917602539	221555461883545	0	0	0		X	X			X
TVAG_182600	Conserved Hypothetical Protein	Uncharacterized	0	0	0	216771926879883	0	219103870391846	0	0	0				X			X
TVAG_183730	Ctl Transporter, Putative	Transmembrane Transport	0	0	0	252066497802734	244915504455566	236383209228516	0	0	0
TVAG_183780	Hypothetical Protein	Uncharacterized	0	239545574188232	241008529663086	0	0	0	0	0	0							X
TVAG_184330	Conserved Hypothetical Protein	Uncharacterized	0	0	241955051422119	240567245483398	24539134979248	242620544433594	0	0	0
TVAG_185070	Conserved Hypothetical Protein	Uncharacterized	0	0	0	0	257512359619141	254278717041016	0	0	0
TVAG_185530	Ankyrin Repeat-Containing Protein, Putative	Uncharacterized	229961414337158	0	0	0	230493469238281	220621700286865	0	0	0				X
TVAG_187980	Modulator Of Drug Activity B, Putative	Uncharacterized	0	0	0	241854820251465	24817045211792	241943778991699	0	0	0
TVAG_188330	Nh(3)-Dependent Nad(+) Synthetase, Putative	Nad Biosynthetic Process	0	0	0	218933773040771	22563814163208	224710998535156	0	0	0				X			X
TVAG_188990	Conserved Hypothetical Protein	Lipid Metabolic Process	0	0	0	234374599456787	247413425445557	2425364112854	0	0	0				X		X	X
TVAG_189000	Ribosomal Rna Methyltransferase, Putative	Uncharacterized	0	0	0	0	24677827835083	23562557220459	0	0	0
TVAG_190320	Lipid A Export Atp-Binding/Permease Protein Msba, Puta	Transmembrane Transport	227255058288574	0	224182319641113	223434009552002	235218105316162	233780899047852	0	0	0	X
TVAG_190330;TVAG_070890	Lipid A Export Atp-Binding/Permease Protein Msba, Puta	Transmembrane Transport	22820068359375	0	22734691619873	223734245300293	234548797607422	233465156555176	0	0	0	X
TVAG_191110	Heat Shock Protein, Putative	Cellular Response To Unfolded Protein	0	0	0	226253566741943	0	223925724029541	0	0	0			X				X
TVAG_193000	Malate And Lactate Dehydrogenase, Putative	Tricarboxylic Acid Cycle	0	0	0	0	251516284942627	258095817565918	2560178565979	255667419433594	245492782592773
TVAG_193770	Rab, Putative	Vesicle Docking Involved In Exocytosis	223879280090332	0	0	236222095489502	232916526794434	239448528289795	0	0	0							X
TVAG_197820	Translation Initiation Inhibitor, Putative	Organonitrogen Compound Catabolic Process	0	0	0	22968090057373	239864177703857	239218883514404	0	0	0		X	X	X
TVAG_198300	Hypothetical Protein	Uncharacterized	0	0	239043521881104	242689228057861	0	240796070098877	0	0	0			X	X		X
TVAG_199100	40S Ribosomal Protein S7, Putative	Rrna Processing	0	0	0	235652313232422	0	230107421875	0	0	0				X
TVAG_201930	Conserved Hypothetical Protein	Uncharacterized	0	0	0	228357257843018	0	223119106292725	0	0	0							X
TVAG_202120	Protein C2Orf4, Putative	Uncharacterized	0	0	0	224279537200928	0	23002799987793	0	0	0
TVAG_202440	Protein Lacx, Plasmid, Putative	Carbohydrate Metabolic Process	0	0	0	236312313079834	231938056945801	236960430145264	0	0	0				X
TVAG_203300	Conserved Hypothetical Protein	Uncharacterized	0	243949947357178	242790222167969	228997707366943	0	221937618255615	0	0	0	X						X
TVAG_203880	Conserved Hypothetical Protein	Uncharacterized	0	0	0	24438793182373	248923587799072	242110404968262	0	0	0							X
TVAG_203910;TVAG_277610;TVAG_535540;TVAG_073290;TVAG_574510;TVAG_538710;TVAG_009050	Myosin-2 Heavy Chain, Non Muscle, Putative	Uncharacterized	0	0	245992336273193	235758857727051	232507381439209	253503322601318	0	0	0	X			X
TVAG_204370	Glucokinase, Putative	Glycolytic Process	223063297271729	0	234370784759521	0	0	0	0	0	0
TVAG_205630	Conserved Hypothetical Protein	Uncharacterized	0	0	0	226682815551758	0	217612972259521	0	0	0							X
TVAG_205740	Conserved Hypothetical Protein	Uncharacterized	0	0	0	246839962005615	250356540679932	247432441711426	0	0	0
TVAG_205920;TVAG_129060	Alpha-Amylase, Putative	Carbohydrate Metabolic Process	0	0	0	23156379699707	0	220157680511475	0	0	0
TVAG_210370	Conserved Hypothetical Protein	Uncharacterized	0	0	0	232875709533691	231294345855713	235143661499023	0	0	0			X	X
TVAG_210920	Conserved Hypothetical Protein	Proteolysis	0	0	0	227754917144775	223547973632813	225445823669434	0	0	0							X
TVAG_210960	Extensin Precursor, Putative	Uncharacterized	0	0	0	265292644500732	244390468597412	2335622215271	0	0	0			X	X
TVAG_211230	Rab7, Putative	Intracellular Protein Transport	0	0	0	232903861999512	0	212734413146973	0	0	0
TVAG_212050	Conserved Hypothetical Protein	Autophagosome Assembly	0	0	214953117370605	235575408935547	226973361968994	23431734085083	0	0	0
TVAG_212480	Conserved Hypothetical Protein	Box C/D Snornp Assembly	223393840789795	0	218781490325928	235598754882813	224053821563721	229799098968506	0	0	0				X
TVAG_212720	Conserved Hypothetical Protein	Uncharacterized	0	0	0	221690101623535	224556331634521	226980781555176	0	0	0							X
TVAG_214880	Conserved Hypothetical Protein	Uncharacterized	0	228081741333008	232302417755127	0	0	0	0	0	0							X
TVAG_215180	Ankyrin Repeat-Containing Protein, Putative	Regulation Of Dna-Templated Transcription	0	0	0	0	234707279205322	236416301727295	0	0	0
TVAG_216900	Ras, Putative	Vesicle Docking Involved In Exocytosis	0	0	223507022857666	238376903533936	230208129882813	223751754760742	0	0	0			X	X			X
TVAG_221660	Conserved Hypothetical Protein	Uncharacterized	0	243449592590332	239002132415771	0	0	0	0	0	0							X
TVAG_222490	Conserved Hypothetical Protein	Methylation	234321155548096	0	236695804595947	233434009552002	243920497894287	239514484405518	0	0	0
TVAG_225550	Alpha-Glucosidase, Putative	Carbohydrate Metabolic Process	0	231960601806641	232348957061768	0	0	0	0	0	0
TVAG_225690	14-3-3 Protein Sigma, Gamma, Zeta, Beta/Alpha, Putative	Signal Transduction	226173973083496	0	21284553527832	207857246398926	0	212701358795166	0	0	0				X
TVAG_226630	Conserved Hypothetical Protein	Uncharacterized	0	0	21611442565918	232684230804443	0	226809101104736	0	0	0				X
TVAG_230180;TVAG_199260	Udp-Glucose 6-Dehydrogenase, Putative	Polysaccharide Biosynthetic Process	216799011230469	0	0	234883651733398	223121032714844	231967658996582	0	0	0				X
TVAG_230600	Conserved Hypothetical Protein	Positive Regulation Of Ubiquitin-Dependent Protein Catabolic Process	219092140197754	0	0	234745693206787	227384490966797	230158195495605	0	0	0				X
TVAG_237110	Neutral Alpha-Glucosidase Ab Precursor, Putative	Carbohydrate Metabolic Process	0	0	222833385467529	238730506896973	228342990875244	223691959381104	0	0	0				X
TVAG_237140	Heat Shock Protein, Putative	Protein Folding	231596488952637	0	239466381072998	0	0	0	0	0	0	X			X		X
TVAG_237740	Conserved Hypothetical Protein	Late Endosome To Vacuole Transport Via Multivesicular Body Sorting Pathway	0	0	0	264752960205078	0	257832927703857	0	0	0
TVAG_237760	Axonemal Dynein Intermediate Chain, Putative	Cilium Movement	0	0	0	220617084503174	0	227931461334229	0	0	0			X	X
TVAG_239670	Conserved Hypothetical Protein	Uncharacterized	0	0	220005149841309	0	225306720733643	220326461791992	0	0	0
TVAG_239720	Conserved Hypothetical Protein	Uncharacterized	229338569641113	231414432525635	233242988586426	0	0	0	0	0	0							X
TVAG_240750	4-Methyl-5(B-Hydroxyethyl)-Thiazo	Glyoxal Metabolic Process	226116676330566	0	232389240264893	245778465270996	239191627502441	245144863128662	0	0	0				X
TVAG_242510	Conserved Hypothetical Protein	Uncharacterized	0	0	220879650115967	217800064086914	230041542053223	231833934783936	0	0	0							X
TVAG_243080	Protein Disulfide Isomerase, Putative	Response To Endoplasmic Reticulum Stress	220689735412598	234347896575928	222681941986084	0	0	0	0	0	0				X		X	X
TVAG_247460	Beta Chain Spectrin, Putative	Uncharacterized	0	0	0	223663711547852	0	213761825561523	0	0	0				X
TVAG_248050;TVAG_312320	Conserved Hypothetical Protein	Carbohydrate Metabolic Process	241425037384033	228306865692139	229345054626465	247893009185791	242307395935059	247305011749268	0	0	0				X
TVAG_249370	Conserved Hypothetical Protein	Uncharacterized	0	0	0	230851306915283	235070018768311	222797164916992	0	0	0				X			X
TVAG_249510	Hypothetical Protein	Uncharacterized	0	0	0	210152931213379	0	216724967956543	0	0	0
TVAG_250540	Conserved Hypothetical Protein	Uncharacterized	0	0	0	232806510925293	228381900787354	229929122924805	0	0	0
TVAG_254480	Conserved Hypothetical Protein	Cell Migration	0	0	227092933654785	226785697937012	23129638671875	235031242370605	0	0	0				X
TVAG_256810	Centaurin Beta, Putative	Regulation Of Catalytic Activity	0	0	0	222398128509521	229054374694824	24902193069458	0	0	0							X
TVAG_257140	Fmn-Dependent Nadh-Azoreductase, Putative	Uncharacterized	0	0	0	24024621963501	229207077026367	229232482910156	0	0	0				X			X
TVAG_258030;TVAG_372420	Ornithine Decarboxylase, Putative	Polyamine Biosynthetic Process	0	0	0	0	223896617889404	227233829498291	0	0	0				X
TVAG_260760	Protein Mo25, Putative	Intracellular Signal Transduction	231908855438232	220223197937012	222741508483887	228724689483643	219179439544678	221811656951904	0	0	0				X
TVAG_262580	Leucine-Rich Repeat Protein, Bspa Family	Uncharacterized	0	0	0	220382862091064	218924503326416	226283187866211	0	0	0							X
TVAG_265950;TVAG_265930;TVAG_265940;TVAG_313290	60S Ribosomal Protein L32, Putative	Uncharacterized	0	0	221278285980225	239074745178223	231283645629883	0	0	0	0				X			X
TVAG_266020	Conserved Hypothetical Protein	Uncharacterized	0	0	0	225649070739746	235394306182861	23786262512207	0	0	0							X
TVAG_268840	Conserved Hypothetical Protein	Uncharacterized	0	0	0	215122451782227	0	219844017028809	0	0	0
TVAG_270470	Conserved Hypothetical Protein	Uncharacterized	0	0	221701717376709	235713787078857	231318531036377	230955181121826	0	0	0				X			X
TVAG_270490	Clan Sb, Family S8, Subtilisin-Like Serine Peptidase	Proteolysis	0	223323802947998	219788627624512	214837989807129	0	0	0	0	0							X
TVAG_270790	N-Acylglucosamine-2-Epimerase, Putative	Carbohydrate Metabolic Process	0	0	230133857727051	246242752075195	0	232110691070557	0	0	0
TVAG_271680	Conserved Hypothetical Protein	Uncharacterized	0	0	0	232184047698975	263045902252197	250586242675781	0	0	0
TVAG_272330	Chaperonin Containing T-Complex Protein	Protein Folding	237057762145996	234946041107178	0	0	0	0	0	0	0				X
TVAG_272760	Glutathione Reductase, Putative	Cell Redox Homeostasis	0	22744457244873	235505123138428	0	0	0	0	0	0
TVAG_273960	Alpha-Glucosidase, Putative	Carbohydrate Metabolic Process	217608489990234	239444046020508	250827369689941	0	0	0	0	0	0						X	X
TVAG_276530;TVAG_071080;TVAG_466700	Cysteine Synthase, Putative	Cysteine Biosynthetic Process From Serine	0	0	0	214029636383057	218797588348389	221808319091797	0	0	0				X
TVAG_277870	Conserved Hypothetical Protein	Uncharacterized	0	0	0	244525566101074	251474018096924	255047016143799	0	0	0				X
TVAG_280090	Conserved Hypothetical Protein	Uncharacterized	0	0	235880641937256	224779071807861	239580154418945	235957107543945	0	0	0	X			X		X
TVAG_280860	Conserved Hypothetical Protein	Uncharacterized	0	0	0	0	255152072906494	246980037689209	0	0	0
TVAG_281590	Conserved Hypothetical Protein	Uncharacterized	0	0	0	250238609313965	0	232139778137207	0	0	0				X			X
TVAG_283080	Conserved Hypothetical Protein	Uncharacterized	0	0	0	242829151153564	238493824005127	235236072540283	0	0	0				X			X
TVAG_284090	Ck1 Family Protein Kinase	Protein Phosphorylation	0	0	0	218201847076416	0	225412521362305	0	0	0							X
TVAG_285890;TVAG_518590	Glucosylceramidase, Putative	Sphingolipid Metabolic Process	0	0	0	257962989807129	227657127380371	229733371734619	0	0	0
TVAG_286280	Conserved Hypothetical Protein	Uncharacterized	0	0	0	249434661865234	259947910308838	25300407409668	0	0	0							X
TVAG_289840	Conserved Hypothetical Protein	Uncharacterized	0	0	0	220093250274658	0	219775352478027	265227699279785	265863475799561	261284503936768				X
TVAG_291880	Rabx19 Protein, Putative	Intracellular Protein Transport	0	0	0	226250438690186	228788223266602	223767127990723	0	0	0
TVAG_296150	Conserved Hypothetical Protein	Regulation Of Dna-Templated Transcription	0	0	0	232878532409668	0	229970893859863	0	0	0				X			X
TVAG_296230	Conserved Hypothetical Protein	Regulation Of Signal Transduction	0	0	0	221651191711426	21178524017334	0	0	0	0				X
TVAG_297440	Conserved Hypothetical Protein	Uncharacterized	0	0	222794036865234	231643371582031	0	221435146331787	0	0	0							X
TVAG_299130	Conserved Hypothetical Protein	Uncharacterized	0	0	0	226451320648193	230796737670898	0	0	0	0				X			X
TVAG_300510	Phosphoglucomutase, Putative	Carbohydrate Metabolic Process	0	0	0	239754371643066	245451011657715	25250825881958	0	0	0			X	X
TVAG_301430;TVAG_318980	Conserved Hypothetical Protein	Trna Metabolic Process	225037784576416	0	233068866729736	250266914367676	242361526489258	245551433563232	0	0	0				X
TVAG_301860	Calcium Binding Protein, Putative	Uncharacterized	0	0	216786975860596	219023857116699	216265830993652	224220352172852	0	0	0				X
TVAG_302410	Conserved Hypothetical Protein	Uncharacterized	0	0	0	23924337387085	234936275482178	23583137512207	0	0	0				X
TVAG_303670	Conserved Hypothetical Protein	Uncharacterized	0	0	0	248504791259766	229970035552979	0	0	0	0				X
TVAG_306060	60S Ribosomal Protein L31, Putative	Cytoplasmic Translation	0	0	0	268368949890137	247386150360107	246052951812744	0	0	0
TVAG_306130	Conserved Hypothetical Protein	Lipid Metabolic Process	228513278961182	0	226325855255127	0	0	0	0	0	0							X
TVAG_306320	Calcium Binding Protein, Putative	Uncharacterized	0	0	0	23042049407959	0	230914554595947	0	0	0				X			X
TVAG_308070	Myo Inositol Monophosphatase, Putative	Sulfate Assimilation	0	0	0	221009159088135	0	219534740447998	0	0	0				X
TVAG_310110	Rab, Putative	Intracellular Protein Transport	0	0	0	230153102874756	0	233941440582275	0	0	0							X
TVAG_310240	Nuclear Movement Protein Nudc, Putative	Protein Folding	0	0	231681690216064	248474235534668	240398426055908	245917778015137	0	0	0				X
TVAG_311320;TVAG_311330;TVAG_238650	Calmodulin, Putative	Mitotic Cell Cycle	0	0	0	237656726837158	0	244301376342773	0	0	0			X	X
TVAG_313880	Conserved Hypothetical Protein	Ubiquitin-Dependent Protein Catabolic Process	0	0	0	231904792785645	221673259735107	22251070022583	0	0	0			X
TVAG_313930	Comm Domain-Containing Protein, Putative	Uncharacterized	0	0	0	224580383300781	225509815216064	225828380584717	0	0	0				X			X
TVAG_313960	Conserved Hypothetical Protein	Cellular Polysaccharide Biosynthetic Process	0	0	0	0	222284965515137	217212562561035	0	0	0				X
TVAG_316110	Syntaxin, Putative	Intracellular Protein Transport	0	0	0	239015941619873	240336380004883	238990135192871	0	0	0				X			X
TVAG_318930	Conserved Hypothetical Protein	Regulation Of Signal Transduction	236384315490723	234328804016113	23895320892334	0	0	0	0	0	0							X
TVAG_319090	Conserved Hypothetical Protein	Uncharacterized	0	0	201749935150146	256005382537842	245982112884521	25362154006958	0	0	0			X	X			X
TVAG_320780	Malic Enzyme, Putative	Uncharacterized	0	0	215676021575928	213954010009766	0	214648323059082	0	0	0				X
TVAG_322520	Dolichyl-Diphos	Protein Glycosylation	24420597076416	253374919891357	257392578125	0	0	0	0	0	0						X	X
TVAG_326010	Conserved Hypothetical Protein	Uncharacterized	0	0	0	229064273834229	0	223426971435547	0	0	0				X			X
TVAG_326760	Histidinol-Phosphate Aminotransferase, Putative	Cellular Amino Acid Metabolic Process	0	0	0	0	214447555541992	220291118621826	0	0	0
TVAG_329460	Enolase, Putative	Glycolytic Process	0	0	0	0	268528137207031	254775981903076	262343254089355	256248321533203	0	X	X	X	X
TVAG_332580	Conserved Hypothetical Protein	Uncharacterized	0	0	0	218438358306885	225412044525146	235242042541504	0	0	0
TVAG_333140	Conserved Hypothetical Protein	Uncharacterized	0	0	0	22389949798584	0	21363618850708	0	0	0							X
TVAG_333150	Clathrin Coat Assembly Protein Ap-1, Putative	Protein Targeting	0	0	0	217954273223877	0	219124355316162	0	0	0				X
TVAG_335100	Conserved Hypothetical Protein	Uncharacterized	0	0	0	243667297363281	226472854614258	211650276184082	0	0	0	X			X
TVAG_336940	Glucokinase, Putative	Glycolytic Process	0	22825611114502	234416446685791	237756519317627	24183666229248	240496788024902	0	0	0
TVAG_337040	Conserved Hypothetical Protein	Uncharacterized	0	0	0	251861248016357	0	26171443939209	0	0	0
TVAG_339630	Thioredoxin, Putative	Cellular Oxidant Detoxification	0	0	0	233509731292725	231350517272949	234272632598877	0	0	0				X			X
TVAG_339770	Conserved Hypothetical Protein	Uncharacterized	0	241982803344727	237336578369141	0	0	0	0	0	0
TVAG_340320	Conserved Hypothetical Protein	Uncharacterized	0	0	0	2409006690979	0	234779071807861	0	0	0
TVAG_340420	Conserved Hypothetical Protein	Intraciliary Transport Involved In Cilium Assembly	0	0	0	221810131072998	222036514282227	2227121925354	0	0	0				X			X
TVAG_340730	Dtdp-4-Dehydrorhamnose 3,5-Epimerase, Putative	Cellular Polysaccharide Biosynthetic Process	230245361328125	0	0	227956466674805	0	22580493927002	0	0	0				X
TVAG_342580;TVAG_304330	Conserved Hypothetical Protein	Proteolysis	0	0	0	241686725616455	234369506835938	0	0	0	0	X
TVAG_343470	Protein Fam49B, Putative	Regulation Of Actin Filament Polymerization	0	0	0	238701362609863	0	234994792938232	0	0	0							X
TVAG_344830	Thymidine Kinase, Putative	Deoxyribonucleoside Monophosphate Biosynthetic Process	0	0	0	224541015625	0	222993869781494	0	0	0
TVAG_348050	Conserved Hypothetical Protein	Uncharacterized	0	0	0	0	225775928497314	223315048217773	0	0	0
TVAG_349780	Conserved Hypothetical Protein	Uncharacterized	0	0	217029895782471	232475833892822	0	215513572692871	0	0	0							X
TVAG_350740	Conserved Hypothetical Protein	Uncharacterized	0	0	0	234814834594727	226336727142334	220690727233887	0	0	0
TVAG_351760	Conserved Hypothetical Protein	Uncharacterized	0	0	0	237792644500732	233390579223633	233737163543701	0	0	0			X	X
TVAG_351870	Secretory Carrier-Associated Membrane Protein, Putative	Protein Transport	0	243333358764648	0	245529174804688	239531364440918	0	0	0	0							X
TVAG_353990	Conserved Hypothetical Protein	Deoxyribonucleoside Monophosphate Biosynthetic Process	0	0	0	23088191986084	0	210403270721436	0	0	0				X			X
TVAG_354150	Trichohyalin, Putative	Uncharacterized	0	0	0	241496524810791	0	235130405426025	0	0	0							X
TVAG_355860;TVAG_409350	Prefoldin Subunit, Putative	Regulation Of Dna-Templated Transcription	0	0	0	235682506561279	236868839263916	231799659729004	0	0	0				X
TVAG_360000	Soluble Nsf Attacment Protein, Putative	Intracellular Protein Transport	0	0	0	213161716461182	0	215170116424561	0	0	0				X			X
TVAG_360440	Carmil, Putative	Cell Migration	0	0	0	243455009460449	235112323760986	235126781463623	0	0	0
TVAG_362930	Malate Dehydrogenase, Putative	Tricarboxylic Acid Cycle	0	0	0	231976795196533	224744701385498	0	0	0	0				X
TVAG_363220	Conserved Hypothetical Protein	Dephosphorylation	0	0	0	22183801651001	223589324951172	226580944061279	0	0	0							X
TVAG_363600	Conserved Hypothetical Protein	Uncharacterized	0	226144561767578	233533973693848	0	0	0	0	0	0							X
TVAG_363820	Ankyrin Repeat-Containing Protein, Putative	Uncharacterized	0	0	0	215885677337646	0	219144439697266	0	0	0
TVAG_366320	Pyrazinamidase/Nicotinamidase, Putative	Uncharacterized	0	0	0	237565402984619	227386341094971	232310485839844	0	0	0				X			X
TVAG_366350	Hypothetical Protein	Uncharacterized	0	0	0	228996963500977	0	221803760528564	0	235829067230225	0				X
TVAG_367580	Calmodulin, Putative	Uncharacterized	0	0	0	0	256671447753906	259116401672363	0	0	0
TVAG_368230	U3 Small Nucleolar Ribonucleoprotein Mpp10, Putative	Uncharacterized	0	0	0	225354270935059	223219051361084	225634880065918	0	0	0
TVAG_368240	Axoneme-Associated Protein Mst101, Putative	Uncharacterized	0	0	0	0	235060329437256	242070217132568	0	0	0
TVAG_368970	Peptidylprolyl Isomerase, Putative	Protein Peptidyl-Prolyl Isomerization	0	0	0	259484443664551	259245185852051	261609649658203	0	0	0				X
TVAG_369280	Clan Ma, Family M8, Leishmanolysin-Like Metallopeptidase	Proteolysis	0	0	0	238978137969971	238674049377441	234307136535645	0	0	0							X
TVAG_370540	Conserved Hypothetical Protein	Uncharacterized	0	0	0	22139461517334	0	222161712646484	0	0	0							X
TVAG_371840	Alpha-Mannosidase, Putative	Carbohydrate Metabolic Process	0	0	0	20500768661499	212965335845947	255107192993164	0	0	0
TVAG_373240	Skeletal Muscle/Kidney Enriched Inositol 5-Phosp	Inositol Phosphate Dephosphorylation	223494071960449	0	222316036224365	0	0	225550365447998	0	0	0							X
TVAG_375220	Conserved Hypothetical Protein	Uncharacterized	0	23822696685791	236905117034912	0	0	0	0	0	0							X
TVAG_375500	Calpain, Putative	Proteolysis	0	0	0	242437973022461	233753070831299	232674236297607	0	0	0							X
TVAG_376790	Clan Sb, Family S8, Subtilisin-Like Serine Peptidase	Proteolysis	0	227191047668457	223662376403809	223375873565674	225219554901123	0	0	0	0	X						X
TVAG_377740;TVAG_519070	Conserved Hypothetical Protein	Uncharacterized	224055366516113	229400367736816	239392127990723	213331985473633	0	0	0	0	0	X			X			X
TVAG_378110;TVAG_378000	Hypothetical Protein	Uncharacterized	0	0	0	236392040252686	235468673706055	243358592987061	0	0	0
TVAG_378570	Histidinol-Phosphate Aminotransferase, Putative	Biosynthetic Process	0	0	0	217765960693359	222429256439209	220449352264404	0	0	0				X
TVAG_378960	Clan S-, Family S54, Rhomboid-Like Serine Peptidase	Proteolysis	0	0	0	215720500946045	0	211800422668457	0	0	0
TVAG_379050	Conserved Hypothetical Protein	Uncharacterized	0	0	0	0	231618785858154	233665294647217	0	0	0							X
TVAG_379430	Conserved Hypothetical Protein	Uncharacterized	0	0	0	0	226450233459473	240889358520508	0	0	0	X
TVAG_379760	Clan Sb, Family S8, Subtilisin-Like Serine Peptidase	Proteolysis	0	0	0	0	218156967163086	212440013885498	0	0	0	X						X
TVAG_379830	Deoxyuridine 5-Triphosphate Nucleotidohydrolase, Puta	Dump Biosynthetic Process	0	0	0	236167240142822	218242321014404	22662425994873	0	0	0				X
TVAG_379850	Rab32, Putative	Vesicle Docking Involved In Exocytosis	219283905029297	226025905609131	0	217595100402832	0	0	0	0	0	X						X
TVAG_381290	Heat Shock Protein, Putative	Uncharacterized	0	228300476074219	229140777587891	0	0	216407718658447	0	0	0				X		X
TVAG_381310	Malate And Lactate Dehydrogenase, Putative	Tricarboxylic Acid Cycle	240642280578613	0	230829734802246	238464202880859	256124000549316	267657241821289	0	0	0			X	X		X
TVAG_383310	Conserved Hypothetical Protein	Carbohydrate Metabolic Process	0	0	0	0	217707614898682	227855834960938	0	0	0							X
TVAG_384150	Conserved Hypothetical Protein	Cilium Assembly	0	0	0	20933874130249	223398456573486	0	0	0	0	X						X
TVAG_384390	Aminohydrolase, Putative	Pyrimidine Nucleobase Catabolic Process	0	0	0	224835033416748	216310749053955	233531284332275	0	0	0
TVAG_384480	Ribokinase, Putative	Carbohydrate Metabolic Process	0	0	0	244700450897217	240349826812744	248573303222656	0	0	0
TVAG_385330	Rna-Binding Protein, Putative	Uncharacterized	0	0	0	223486518859863	221746578216553	219452800750732	0	0	0				X
TVAG_385820	Clan Mh, Family M20, Peptidase T-Like Metallopeptidase	Proteolysis	0	0	0	0	227631816864014	225555763244629	0	0	0				X
TVAG_387970	Malate Dehydrogenase, Putative	Tricarboxylic Acid Cycle	0	0	0	234276466369629	0	232899646759033	0	0	0				X
TVAG_389730	Conserved Hypothetical Protein	Uncharacterized	0	0	0	232027702331543	222701072692871	231373519897461	0	0	0				X
TVAG_389820	Conserved Hypothetical Protein	Cell Migration	0	0	0	225729522705078	224362144470215	227502956390381	0	0	0
TVAG_390790	Programmed Cell Death, Putative	Uncharacterized	0	0	0	241325759887695	0	231658401489258	0	0	0				X
TVAG_390860	Conserved Hypothetical Protein	Uncharacterized	0	0	0	235095405578613	0	23564302444458	0	0	0				X			X
TVAG_391150	Conserved Hypothetical Protein	Dephosphorylation	0	0	228971500396729	244069137573242	242621269226074	241035766601563	0	0	0							X
TVAG_391170	Conserved Hypothetical Protein	Cell Migration	0	0	0	244263687133789	238307437896729	236783103942871	0	0	0
TVAG_391590	Conserved Hypothetical Protein	Uncharacterized	0	0	0	240899047851563	251342601776123	244024314880371	0	0	0	X						X
TVAG_391630	4-Nitrophenylphosphatase, Putative	Uncharacterized	0	0	0	0	227327270507813	227239875793457	0	0	0				X
TVAG_391760	Phosphofructokinase, Putative	Fructose 6-Phosphate Metabolic Process	0	2541335105896	242241287231445	0	0	0	0	0	0	X			X		X	X
TVAG_393280	Deoxyribose-Phosphate Aldolase, Putative	Deoxyribonucleotide Catabolic Process	243709259033203	242320575714111	242403812408447	243808650970459	253519840240479	248479499816895	0	0	0			X	X
TVAG_394470	Vesicular Mannose-Binding Lectin, Putative	Endoplasmic Reticulum To Golgi Vesicle-Mediated Transport	0	224323196411133	223846378326416	0	0	0	0	0	0							X
TVAG_395550	Acetyl-Coa Hydrolase, Putative	Acetate Metabolic Process	0	240637340545654	241129093170166	0	0	0	0	0	0	X			X		X
TVAG_396060	F-Actin Capping Protein Beta Subunit, Putative	Cell Morphogenesis	222819805145264	0	0	227988128662109	0	236437244415283	0	0	0				X
TVAG_396670	Loricrin, Putative	Uncharacterized	0	0	236190776824951	240992469787598	247275428771973	247395420074463	0	0	0
TVAG_397250	Glucokinase, Putative	Glycolytic Process	232500019073486	233892936706543	241084499359131	0	0	0	0	0	0				X		X
TVAG_401920	Hypothetical Protein	Uncharacterized	0	0	0	213151206970215	226668949127197	230463695526123	0	0	0
TVAG_402240	Acid Phosphatase, Putative	Dephosphorylation	0	0	0	245890369415283	246818542480469	240971584320068	0	0	0	X						X
TVAG_403280	Family T1, Proteasome Beta Subunit, Threonine Peptidase	Proteasomal Protein Catabolic Process	240851306915283	0	248470420837402	235335025787354	235909214019775	244006080627441	0	0	252645626068115
TVAG_406950	Conserved Hypothetical Protein	Uncharacterized	0	0	0	221679992675781	24366662979126	249671478271484	0	0	0				X
TVAG_408870	Conserved Hypothetical Protein	Cell Morphogenesis	0	0	0	241197319030762	0	237875576019287	0	0	0							X
TVAG_410260	Clan Ca, Family C1, Cathepsin L-Like Cysteine Peptidase	Proteolysis	0	0	247253093719482	245355205535889	244461326599121	248759593963623	0	0	0				X		X
TVAG_410690	Conserved Hypothetical Protein	Protein Dephosphorylation	224071464538574	0	0	222706489562988	221962852478027	223913669586182	0	0	0				X
TVAG_411870;TVAG_348390	Aldo-Keto Reductase, Putative	Uncharacterized	0	0	0	234914283752441	246485595703125	242974700927734	0	0	0
TVAG_416130;TVAG_175800	Diacylglycerol Kinase, Putative	Signal Transduction	0	0	0	228287315368652	0	2168701171875	0	0	0
TVAG_416510	Adenosine Deaminase, Putative	Adenosine Catabolic Process	0	0	0	0	0	218403816223145	232654209136963	234388561248779	233776931762695			X
TVAG_416610	Conserved Hypothetical Protein	Uncharacterized	0	0	0	23058557510376	234243183135986	224840679168701	0	0	0							X
TVAG_417870	Clan Ca, Family C19, Ubiquitin Hydrolase-Like Cy	Ubiquitin-Dependent Protein Catabolic Process	0	0	0	217811679840088	0	220464687347412	0	0	0							X
TVAG_418050	Charged Multivesicular Body Protein 6-B, Putative	Vesicle Budding From Membrane	0	0	0	227285614013672	0	225532093048096	0	0	0				X			X
TVAG_419590;TVAG_092800	Ornithine Cyclodeaminase, Putative	Uncharacterized	0	240857791900635	0	268184852600098	271655712127686	265472946166992	0	0	0			X	X
TVAG_421570	Conserved Hypothetical Protein	Uncharacterized	0	0	0	2297389793396	0	225325050354004	0	0	0				X			X
TVAG_421700	Conserved Hypothetical Protein	Uncharacterized	0	0	0	223973598480225	0	224423274993896	0	0	0							X
TVAG_422670	Conserved Hypothetical Protein	Uncharacterized	0	0	0	23422908782959	230357875823975	0	0	0	0
TVAG_423170	Heat Shock Protein 70 (Hsp70)-Interacting Protein, Pu	Protein Folding	0	0	21876277923584	216967639923096	218751525878906	218500308990479	0	0	0				X
TVAG_424130	Inosine-Uridine Preferring Nucleoside Hydrolase, Putati	Nucleobase-Containing Compound Metabolic Process	0	0	0	238247375488281	234996013641357	229215068817139	0	0	241971549987793				X
TVAG_424960;TVAG_093030	Conserved Hypothetical Protein	Carbohydrate Metabolic Process	0	0	0	0	226477699279785	227346096038818	0	0	0	X			X
TVAG_426230	Conserved Hypothetical Protein	Uncharacterized	0	0	0	223703670501709	252741241455078	252419815063477	0	0	0	X
TVAG_427040	Conserved Hypothetical Protein	Uncharacterized	0	0	213584766387939	0	223639125823975	248340759277344	0	0	0			X	X
TVAG_429790	Conserved Hypothetical Protein	Protein Folding	23177490234375	242531356811523	240412635803223	0	0	0	0	0	0				X		X
TVAG_431010	Protein Phsophatase-2A, Putative	Asymmetric Protein Localization To Old Mitotic Spindle Pole Body	249789752960205	0	0	233558197021484	228885173797607	238047904968262	0	0	0							X
TVAG_431050	Conserved Hypothetical Protein	Endosome Organization	0	0	223333625793457	232337265014648	219107532501221	229608974456787	0	0	0							X
TVAG_432340	Conserved Hypothetical Protein	Protein Transport	0	0	0	225809535980225	22520565032959	0	0	0	0							X
TVAG_432570	Snare Protein Ykt6, Putative	Endoplasmic Reticulum To Golgi Vesicle-Mediated Transport	0	227369022369385	23311466217041	245318374633789	239078407287598	239504699707031	0	0	0				X			X
TVAG_432930	Hypothetical Protein	Vesicle Docking Involved In Exocytosis	0	0	0	237060928344727	237756519317627	0	0	0	0							X
TVAG_433060	Hypothetical Protein	Uncharacterized	0	0	0	0	225939559936523	221540031433105	0	0	0
TVAG_434390	Pyridoxal-5-Phosphate Phosphatase, Putative	Uncharacterized	0	0	0	23886043548584	230882892608643	235781917572021	0	0	0				X
TVAG_434420	Lim Domain, Putative	Uncharacterized	0	0	232596874237061	248446979522705	23484806060791	230593338012695	0	0	0							X
TVAG_434770	Rab5B, Putative	Intracellular Protein Transport	0	0	0	216911506652832	0	217697944641113	0	0	0							X
TVAG_437410	Phosphoenolpyruvate-Protein Phosphotransferase, Putative	Pyruvate Metabolic Process	0	0	0	0	239309368133545	239701805114746	0	0	0			X
TVAG_581680;TVAG_534210;TVAG_571750;TVAG_441460;TVAG_586740;TVAG_596730;TVAG_601400;TVAG_589900;TVAG_567930;TVAG_554200;TVAG_512450;TVAG_102610;TVAG_285220;TVAG_561640;TVAG_528910;TVAG_586410;TVAG_449570;TVAG_105560;TVAG_539610;TVAG_533280;TVAG_293690	Conserved Hypothetical Protein	Uncharacterized	0	0	0	0	273954200744629	271549911499023	0	0	0
TVAG_442070	Glucose Kinase, Putative	Negative Regulation Of Dna-Templated Transcription	0	0	0	254255046844482	245680770874023	250276622772217	0	0	0
TVAG_443080	Conserved Hypothetical Protein	Vesicle Docking Involved In Exocytosis	228285369873047	0	222739810943604	229977779388428	22592565536499	220926494598389	0	0	0							X
TVAG_443540	Coiled-Coil Domain-Containing Protein, Putative	Uncharacterized	0	0	0	221400547027588	0	226199054718018	0	0	0
TVAG_444980	Calcium-Dependent Protein Kinase, Putative	Uncharacterized	0	0	0	231716079711914	238154830932617	234724636077881	0	0	0				X			X
TVAG_446580	Conserved Hypothetical Protein	Uncharacterized	0	0	216294765472412	226728191375732	0	224626884460449	0	0	0				X			X
TVAG_446640	Conserved Hypothetical Protein	Uncharacterized	0	0	227459964752197	249037551879883	24669849395752	242209606170654	0	0	0				X			X
TVAG_447920	Agc Family Protein Kinase	Protein Phosphorylation	0	0	227847652435303	235244445800781	225992565155029	224860343933105	0	0	0				X			X
TVAG_450700;TVAG_344270	Conserved Hypothetical Protein	Uncharacterized	0	0	0	243466510772705	0	23732105255127	0	0	0
TVAG_452140	Nitrate, Fromate, Iron Dehydrogenase, Putative	Uncharacterized	0	0	0	233252601623535	239778842926025	0	0	0	0
TVAG_453950	Conserved Hypothetical Protein	Uncharacterized	0	0	0	231733322143555	234049663543701	243043823242188	0	0	0
TVAG_455630	Conserved Hypothetical Protein	Uncharacterized	0	0	235588245391846	248757705688477	236598148345947	242154159545898	0	0	0							X
TVAG_456670	Homeobox-Containing Protein Wariai, Putative	Uncharacterized	0	0	0	222272624969482	218979244232178	223485698699951	0	0	0
TVAG_458970	Conserved Hypothetical Protein	Formation Of Translation Preinitiation Complex	0	0	223988227844238	236962547302246	232810745239258	237469387054443	0	0	0				X			X
TVAG_459010	Wd-Repeat Protein, Putative	Autophagosome Assembly	0	0	0	221240158081055	0	221765766143799	0	0	0
TVAG_461620	Oxidoreductases, Putative	Uncharacterized	0	0	0	239117774963379	239937763214111	23880916595459	0	0	0				X
TVAG_462290	Phosphatidylinositol-4-Phosphate 5-Kinase Type Ii, Pu	Phosphorylation	0	0	225629997253418	229486885070801	230904865264893	232336826324463	0	0	0							X
TVAG_462440	Conserved Hypothetical Protein	Uncharacterized	0	0	0	245590591430664	0	231012210845947	0	0	0				X			X
TVAG_462680	Clan Sc, Family S28, Unassigned Serine Peptidase	Proteolysis	22862060546875	0	229466915130615	23483699798584	227956466674805	226967430114746	0	0	0							X
TVAG_465160	Conserved Hypothetical Protein	Uncharacterized	0	0	0	23594799041748	230235061645508	232989387512207	0	0	0				X
TVAG_465840	Conserved Hypothetical Protein	Proteasome-Mediated Ubiquitin-Dependent Protein Catabolic Process	221284580230713	0	0	232999172210693	236849594116211	230004978179932	0	0	0				X
TVAG_466240	Conserved Hypothetical Protein	Ubiquinone Biosynthetic Process	0	0	0	0	220572528839111	228264636993408	0	0	0
TVAG_468210	Deoxyribose-Phosphate Aldolase, Putative	Deoxyribonucleotide Catabolic Process	225246124267578	0	231174354553223	228867321014404	240638980865479	237815685272217	0	0	0			X	X
TVAG_470330	60S Ribosomal Protein L32 And D	Translation	0	0	0	220599613189697	0	220675296783447	0	0	0				X
TVAG_472760	Conserved Hypothetical Protein	Uncharacterized	0	0	0	22458963394165	220941333770752	221049842834473	0	0	0
TVAG_475220	Glyceraldehyde 3-Phosphate Dehydrogenase, Putative	Glucose Metabolic Process	0	0	0	266861896514893	254515819549561	264468116760254	0	0	0		X	X	X
TVAG_476100	Glyceraldehyde 3-Phosphate Dehydrogenase, Putative	Glucose Metabolic Process	254584197998047	0	246600875854492	265963363647461	25075532913208	270399875640869	0	0	0
TVAG_476580	Conserved Hypothetical Protein	Uncharacterized	0	226290092468262	22693790435791	0	0	0	0	0	0
TVAG_476690	Dnaj/Hsp40, Putative	Uncharacterized	0	228838844299316	227256107330322	0	0	0	0	0	0				X
TVAG_478410	Conserved Hypothetical Protein	Uncharacterized	239717597961426	256430358886719	262177295684814	0	0	0	0	0	0				X		X	X
TVAG_478850	Na+ Driven Multidrug Efflux Pump, Putative	Xenobiotic Transport	0	0	0	0	231771259307861	232771072387695	0	0	0	X						X
TVAG_482780	Clan Sc, Family S28, Unassigned Serine Peptidase	Proteolysis	225323619842529	0	224994297027588	237334518432617	0	0	0	0	0							X
TVAG_484030	Beta-Hexosaminidase, Putative	Carbohydrate Metabolic Process	0	228126659393311	232203559875488	0	0	0	0	0	0
TVAG_484040	Adp-Ribosylation Factor, Arf, Putative	Cilium Assembly	0	0	0	208450603485107	0	225773849487305	0	0	0							X
TVAG_485280	Conserved Hypothetical Protein	Peptidoglycan Turnover	0	0	0	243848876953125	235937747955322	241689796447754	0	0	0
TVAG_486970	Conserved Hypothetical Protein	Translational Initiation	0	0	0	22847146987915	0	217951507568359	0	0	0				X
TVAG_487340	Galactokinase, Putative	Galactose Metabolic Process	230532474517822	0	0	224102821350098	227352504730225	229671039581299	0	0	0			X	X
TVAG_487350	Conserved Hypothetical Protein	Uncharacterized	0	0	0	230674476623535	228990688323975	0	0	0	0							X
TVAG_490400	Conserved Hypothetical Protein	Uncharacterized	0	0	0	220377502441406	0	218418407440186	0	0	0				X
TVAG_491760;TVAG_491750;TVAG_491730	Conserved Hypothetical Protein	Uncharacterized	0	229305934906006	223932018280029	22247859954834	229885330200195	225684833526611	0	0	0							X
TVAG_493000	Adenylate Kinase 1, Putative	Nucleobase-Containing Compound Metabolic Process	0	0	0	228542423248291	225878810882568	226835899353027	0	0	0				X			X
TVAG_493840	Developmentally Regulated Protein Tpo1, Putative	Uncharacterized	0	0	0	255491905212402	0	247962989807129	0	0	0							X
TVAG_494470	Conserved Hypothetical Protein	Uncharacterized	0	0	0	224325485229492	228678398132324	226323642730713	0	0	0				X			X
TVAG_497090	Dead Box Atp-Dependent Rna Helicase, Putative	Translational Initiation	0	0	0	226430416107178	229005432128906	22567554473877	0	0	0				X
TVAG_498870	Conserved Hypothetical Protein	Uncharacterized	0	0	0	240066738128662	240210666656494	229415435791016	0	0	0	X			X
TVAG_499250	Phospholipid-Transporting Atpase, Putative	Phospholipid Transport	0	0	0	222280254364014	229354953765869	227950115203857	0	0	0							X
TVAG_499740	Conserved Hypothetical Protein	Uncharacterized	0	0	0	217680988311768	223081359863281	0	0	0	0				X			X
TVAG_517010	Nad(P)H Dehydrogenase, Putative	Uncharacterized	0	0	221159114837646	222982406616211	243384456634521	235584754943848	0	0	0				X
TVAG_528820	Conserved Hypothetical Protein	Uncharacterized	0	224637851715088	23204174041748	0	225631847381592	0	0	0	0	X						X
TVAG_533950	Conserved Hypothetical Protein	Endocytosis	0	0	0	0	216657466888428	219242286682129	0	0	0
TVAG_551850	Conserved Hypothetical Protein	Actin Cytoskeleton Organization	0	0	0	217867603302002	222270278930664	220011329650879	0	0	0
TVAG_553420	6-Phosphogluconate Dehydrogenase, Putative	Pentose-Phosphate Shunt	0	0	0	21245626449585	224043674468994	235903511047363	0	0	0
TVAG_573900;TVAG_416150;TVAG_095990;TVAG_398620	Conserved Hypothetical Protein	Uncharacterized	0	0	0	0	228513088226318	239237022399902	0	0	0	X
TVAG_RG_DS113183_26	Hypothetical Protein	Uncharacterized	19363224029541	0	194920101165771	249198436737061	219481353759766	236776657104492	0	0	0
TVAG_RG_DS113197_2	Hypothetical Protein	Uncharacterized	0	0	0	231464710235596	0	225329322814941	0	0	0
